1 **Title: Distinct Colon Mucosa Microbiomes associated with Tubular Adenomas and Serrated**

2 **Polyps**

3

4 **Authors:** Julio Avelar-Barragan\*, Lauren DeDecker\*\*, Zachary Lu\*\*, Bretton Coppedge\*,

5 William E. Karnes\*\*, Katrine L. Whiteson\*

6

7 \* School of Biological Sciences, University of California, Irvine

8 \*\* School of Medicine, University of California, Irvine.

9

10 **Corresponding author:**

11 Julio Avelar-Barragan – [javelarb@uci.edu](mailto:javelarb@uci.edu)

12 **Keywords:** Colorectal cancer, polyps, human, gut, microbiome, serrated, tubular, adenoma

13

14 **Abbreviations:**

|     |                              |
|-----|------------------------------|
| CRC | Colorectal cancer            |
| APC | Adenomatous polyposis coli   |
| HPP | Hyperplastic polyp           |
| TSA | Traditional serrated adenoma |
| SSP | Sessile serrated polyp       |
| TA  | Tubular adenoma              |
| OTU | Operational taxonomic unit   |
| ASV | Amplicon sequence variant    |
| ORF | Open reading frame           |
| LME | Linear mixed effects model   |
| GH  | Glycoside hydrolase          |

15

16 **Abstract:**

17

18 **Background:** Colorectal cancer is the second most deadly and third most common cancer in the  
19 world. Its development is heterogenous, with multiple mechanisms of carcinogenesis. Two distinct  
20 mechanisms include the adenoma-carcinoma sequence and the serrated pathway. The gut  
21 microbiome has been identified as a key player in the adenoma-carcinoma sequence, but its role  
22 in serrated carcinogenesis is unclear. In this study, we characterized the gut microbiome of 140  
23 polyp-free and polyp-bearing individuals using colon mucosa and fecal samples to determine if  
24 microbiome composition was associated with each of the two key pathways.

25 **Results:** We discovered significant differences between colon mucosa and fecal samples,  
26 explaining 14% of the variation observed in the microbiome. Multiple mucosal samples were  
27 collected from each individual to investigate the gut microbiome for differences between polyp  
28 and healthy intestinal tissue, but no such differences were found. Colon mucosa sampling revealed  
29 that the microbiomes of individuals with tubular adenomas and serrated polyps were significantly  
30 different from each other and polyp-free individuals, explaining 2-10% of the variance in the  
31 microbiome. Further analysis revealed differential abundances of *Eggerthella lenta*, *Clostridium*  
32 *scindens*, and three microbial genes across tubular adenoma, serrated polyp, and polyp-free cases.

33 **Conclusion:** By directly sampling the colon mucosa and distinguishing between the different  
34 developmental pathways of colorectal cancer, this study helps characterize potential mechanistic  
35 targets and diagnostic biomarkers for serrated carcinogenesis. This research also provides insight  
36 into multiple microbiome sampling strategies by assessing each method's practicality and effect  
37 on microbial community composition.

## 38 **Introduction:**

39           Colorectal cancer (CRC) is the second most deadly and third most common cancer  
40 globally, accounting for over 900,000 deaths in 2020.<sup>1</sup> The etiologies of CRC are multifactorial,  
41 with only 5-10% of cases being attributable to hereditary germline mutations.<sup>2</sup> Significant risk  
42 factors include diets high in red meat and low in fiber, obesity, physical inactivity, drug and alcohol  
43 usage, and chronic bowel inflammation.<sup>3-6</sup> Each of these factors is associated with compositional  
44 and functional changes in the collective community of bacteria, fungi, archaea, and viruses that  
45 inhabit the colon.<sup>7-10</sup> Commonly referred to as the gut microbiome, this community of  
46 microorganisms has been identified as a potential regulator of CRC initiation and progression.

47           Colorectal polyp formation precedes cancer development and is influenced by various  
48 environmental factors and host genetics. Polyps most commonly progress into malignancy through  
49 the adenoma-carcinoma sequence.<sup>11</sup> This pathway is characterized by chromosomal instability and  
50 mutations in the adenomatous polyposis coli (APC) gene, KRAS oncogene, and TP53 tumor  
51 suppressor gene.<sup>12</sup> Alternatively, 15 to 30% of CRCs develop through the serrated pathway.<sup>13</sup> This  
52 pathway is characterized by the epigenetic hypermethylation of gene promoters to produce a CpG  
53 island methylator phenotype.<sup>13</sup> In addition to the epigenetic inactivation of tumor suppressor  
54 genes, BRAF or KRAS mutations are also common.<sup>13</sup> The serrated pathway often results in the  
55 production of hyperplastic polyps (HPPs), traditional serrated adenomas (TSAs), and sessile  
56 serrated polyps (SSPs). Premalignant polyps from both pathways can be screened for and removed  
57 during colonoscopy to prevent CRC formation, but incomplete polyp resection or escaped  
58 detection can result in the development of interval cancers. Compared to other colorectal polyps,  
59 SSPs are disproportionately responsible for interval cancers, as their flat morphology makes them

60 difficult to detect.<sup>14</sup> Therefore, additional detection methods, such as SSP-specific biomarkers,  
61 would assist with CRC prevention.

62 One potential avenue for polyp-specific biomarker discovery is the gut microbiota. SSPs  
63 often overexpress mucin forming genes, like MUC6, MUC5aC, MUC17, and MUC2, producing a  
64 mucus cap, which may harbor mucin-degrading bacteria and other microbes.<sup>15</sup> Finding  
65 microbiome alterations in patients consistent with the presence of SSPs would enable  
66 gastroenterologists to personalize their technique and screening frequency for these higher risk  
67 patients. Additionally, elucidating the microbiome alterations specific to the adenoma-carcinoma  
68 sequence and the serrated pathway would help better understand the mechanisms of how particular  
69 microbes, their metabolites, and dysbiosis may contribute to CRC carcinogenesis.

70 Studies comparing the microbiomes of these two pathways with healthy controls have yet  
71 to discover differences between healthy individuals and those with serrated polyps.<sup>16-18</sup> One  
72 limitation of existing CRC research is the dominant use of stool samples for assessing the  
73 microbiome, which has been shown to reflect the bacteria found in the lumen of the colon.<sup>19</sup>  
74 Mucosal samples, on the other hand, reflect the bacteria that are adherent to the epithelium and  
75 thus may be more clinically relevant in CRC pathogenesis.<sup>20</sup> To investigate this, and the role of  
76 the microbiome in the adenoma-carcinoma sequence and serrated pathway, we used multiple  
77 sampling techniques to obtain microbiome samples from colorectal polyps. Samples were  
78 collected during and after colonoscopy from healthy individuals or those with tubular adenomas  
79 (TAs), HPPs, or SSPs. When possible, samples from the same individual were collected from  
80 polyps and the healthy colon epithelium opposite from these polyps. Stool samples were also  
81 collected 4-6 weeks after colonoscopy. We used a combination of amplicon (16S and ITS) and  
82 shotgun sequencing to characterize the microbial communities of samples. The purpose of our

83 work was to: 1) investigate the feasibility and utility of using two novel methods of microbiome  
84 sampling during colonoscopy; 2) elucidate hyperlocal differences in the microbiome of the colon  
85 to find polyp specific biomarkers; and 3) elucidate changes in the microbiome specific to CRC  
86 precursors in the adenoma-carcinoma sequence versus the serrated pathway. Our key hypothesis  
87 was that there would be distinct differences between the microbiomes of individuals with serrated  
88 polyps versus TAs.

## 89 **Methods and Materials:**

### 90 *Subject Recruitment and Criteria:*

91 Individuals who presented for colonoscopy with indications of screening or a prior history  
92 of colorectal polyps were asked to participate in the study. Subjects who were pregnant, had taken  
93 antibiotics within 6 weeks of colonoscopy, or with known inflammatory bowel diseases, were  
94 excluded. In total, 140 individuals were recruited for this study.

### 95 *Colonoscopy Preparation, Procedure, and Sample Collection:*

96 Before colonoscopy, subjects were asked to adhere to a clear liquid diet for 24 hours. Bowel  
97 cleansing was done using Miralax, or polyethylene glycol with electrolytes administered as a split  
98 dose, typically 12 and 5 hours before the procedure. Sample collection focused on two direct and  
99 two indirect microbiome sampling methods. The first direct sampling method involved brushing  
100 the mucosa of colon tissue during colonoscopy. Since mucosal brushes can potentially damage or  
101 agitate the intestine, we also employed a novel method of direct microbiome sampling in which  
102 colonoscopy washing fluid was sprayed directly on to the target mucosa and immediately re-  
103 suctioned into a storage vial. Participants with polyps had additional mucosal washing aspirates  
104 taken near the polyp, as well as brushings of the polyp and opposite wall of the polyp. When more  
105 than one polyp was found, the largest polyp was targeted for mucosal brushing and aspirate

106 sampling. The first indirect sampling method involved collecting an aliquot of the post-  
107 colonoscopy lavage fluid. This lavage fluid was from the entirety of the procedure, thus reflecting  
108 the microbiome throughout the colon. Sampling during colonoscopy resulted in a total of 1,685  
109 samples, which were collected in sterile cryogenic tubes and placed on ice until the colonoscopy  
110 procedure was finished. Afterwards, the samples were stored at -80°C. Additional data collected  
111 included indication for procedure, age, sex, ethnicity, BMI, family history, and findings, including  
112 the size, shape, location, and pathology of all polyps found or removed.

### 113 *Collection of Fecal Samples:*

114 For the second indirect sampling method, subjects were encouraged to send follow-up fecal  
115 samples four to six weeks post-colonoscopy. Subjects who complied were compensated \$20 USD.  
116 Subjects were provided with a fecal collection kit, which contained collection equipment, prepaid  
117 shipping labels, and Zymo DNA/RNA shield preservation buffer (R1101). Samples were returned  
118 via the United States Postal Service. After arrival, samples were stored at -80°C. A total of 38 fecal  
119 samples were returned.

### 120 *Polyp and Subject Type classification:*

121 Polyp biopsies collected during colonoscopy were sent to a pathologist for classification.  
122 This information was then recorded for the corresponding mucosal brush aspirate samples. Polyp  
123 pathology reports were also used to broadly categorize samples by subject type. The three subject  
124 types were polyp-free subjects, TA-bearing subjects, and serrated polyp-bearing subjects, which  
125 included HPPs and SSPs. For example, if a sample was taken from healthy intestinal tissue of an  
126 individual who was found to have a TA, that sample and all others from the same individual would  
127 be included in the TA-bearing subject type. Three individuals had both a TA and an SSP and were  
128 classified as serrated polyp-bearing subjects.

129 ***DNA extraction:***

130 Colonoscopy and fecal samples were thawed on ice for DNA extraction. For mucosal  
131 aspirates and lavage aliquot samples, 250 uL of fluid were taken from each sample and then  
132 extracted using ZymoBiomics DNA Miniprep Kit (D4300) according to the manufacturer's  
133 protocol. For mucosal brushes, 750 uL of ZymoBIOMICS™ Lysis Solution was mixed with the  
134 brushes in their original sterile cryogenic tube and vortexed for 5 minutes to suspend the contents  
135 of the brush into solution. The solution was then transferred and extracted according to the  
136 manufacturer's protocol. Fecal samples stored in Zymo DNA/RNA shield were thawed, mixed by  
137 vortexing, and 750 uL of fecal slurry was extracted according to the manufacturer's protocol.

138 ***Amplicon Library preparation and sequencing:***

139 To amplify the V4 region of the bacterial 16S rRNA gene, 0.5 ng of DNA template was  
140 combined with 9.5 uL of PCR grade water, 12.5 uL of 1x AccustartII PCR tough mix (QuantaBio),  
141 1 ug of BSA, 0.2 uM of 926R reverse 16S primer, and 0.2 uM of barcoded, Illumina adapter  
142 sequence-tagged forward primer 515F in 25 uL reactions. Each sample was amplified for 30 cycles  
143 (94°C for 3 min; 94°C for 45 sec, 55°C for 30 sec, 72°C for 20 sec; repeat steps 2-4 30 times; 72°C  
144 for 10 min).

145 The ITS2 region of the fungal 18S rRNA gene was amplified using the methods described  
146 by Looby et al.<sup>51</sup> Briefly, 0.5 ng of DNA template was combined with 9.5 uL of PCR grade water,  
147 12.5 uL of 1x AccustartII PCR tough mix (QuantaBio), 1 ug of BSA, 0.3 uM of ITS9, and 0.3 uM  
148 of a staggered, barcoded reverse ITS4 primer for a total reaction volume of 25 uL. Samples were  
149 PCR amplified at 94°C for 5 min, 35 cycles of 95°C for 45 sec, 50°C for 1 min, 72°C for 90 sec,  
150 and a final extension step of 72°C for 10 min.



151 Both purified amplicon libraries were quantified using the Qubit dsDNA HS Assay Kit and  
152 pooled at equimolar concentrations. The pooled amplicon library was cleaned and concentrated  
153 using Agencourt AMPure XP beads (Beckman-Coulter, A63880) according to the manufacturer's  
154 protocol. Equimolar PhiX was added at 10% final volume to the amplicon library and sequenced  
155 on the Illumina MiSeq platform, yielding 300bp paired-end sequences. An average of 41,578 +/-  
156 35,920 reads per sample were obtained for 16S amplicons, while an average of 22,252 +/- 17,000  
157 reads per sample were obtained for ITS amplicons.

#### 158 ***Shotgun Library preparation and sequencing:***

159 Shotgun sequencing libraries were prepared using the Illumina Nextera Flex kit, using an  
160 adapted protocol as described by Bruinsma et al.<sup>52</sup> Here, a maximum of 5 uL or 50 ng (whichever  
161 was reached first) of DNA from each sample was tagmented by Nextera bead-linked transposomes  
162 for 15 min at 55°C. Next, 1.25 uL of 1 uM forward and 1.25 uL of 1 uM reverse barcodes were  
163 added to each sample and annealed via PCR using KAPA HiFi DNA Polymerase (Roche Life  
164 Science). Samples were then pooled and cleaned of smaller fragments using the included sample  
165 purification beads according to the manufacturer's protocol. The pooled sample libraries were  
166 quantified using Quanti-iT PicoGreen dsDNA (P7589) and ran on a bioanalyzer to check fragment  
167 size. Lastly, libraries were packaged on dry ice and shipped overnight to Novogene Corporation  
168 Inc. (Sacramento, CA) to be sequenced using Illumina's HiSeq 4000 for 150 bp paired-end  
169 sequencing. An average of 1,267,359 +/- 690,384 reads per sample were obtained.

#### 170 ***OTU Table generation:***

171 For amplicon data, sequences were processed using Qiime2-2019.1.<sup>53</sup> Index sequences  
172 were extracted from reads and demultiplexed in the presence of quality filtering using DADA2 in  
173 QIIME2.<sup>54</sup> Reads were filtered to remove chimeric sequences, and clustered into amplicon

174 sequence variants (ASVs). Taxonomy was assigned with the Greengenes database (May 2013) for  
175 bacteria.<sup>55</sup>

176 For sequences produced by shotgun metagenomic sequencing, we first removed  
177 sequencing adapters, barcodes, and sequencing artifacts, followed by demultiplexing using  
178 BBSplit.<sup>56</sup> After demultiplexing, sequences were quality filtered so that the minimum quality score  
179 did not fall below 28 using PRINSEQ++.<sup>57</sup> Removal of human-derived reads was performed in  
180 Bowtie2 by aligning samples to a reference human genome, hg38.<sup>58</sup> Next, we used IGGSearch on  
181 the lenient preset to characterize the taxonomy of our quality-filtered sequences to generate an  
182 operational taxonomic unit (OTU) table.<sup>59</sup>

### 183 *OTU Table analysis:*

184 Analysis of OTUs was performed using R 3.6.3. A sequencing control was included for  
185 each library to remove potential contaminants before analysis (ZymoBIOMICS #D6305). OTUs  
186 that appeared in the control, but which were not part of the microbial community standard were  
187 removed from the OTU table. To account for read-depth variability, 16S and ITS OTU counts  
188 were rarefied to 3,000 and 1,000 reads, respectively.<sup>60</sup> For shotgun sequence data, 1,500 marker  
189 gene reads from each sample were randomly subsampled ten times and then averaged.

190 Alpha diversity for each OTU table was calculated using the diversity and specnumber  
191 functions in the Vegan v2.5-6 package.<sup>61</sup> Significance of alpha diversity scores was tested using a  
192 linear-mixed effect model, adjusted for repeated measurements and sample plate effects using the  
193 nlme package, v3.1-148.<sup>62</sup> The adonis function in Vegan was used to generate Bray-Curtis  
194 matrices and perform PERMANOVA analyses from OTU tables. Non-metric multidimensional  
195 scaling was performed using the metaMDS function in Vegan. SparCC was used for correlation  
196 analysis of OTUs using the fastspar and MakeBootstraps.py functions.<sup>63</sup> Pseudo  $p_1$  values were

197 calculated for sparCC correlations using the PseudoPvals.py script. Plotting for all analyses was  
198 done using ggplot2 v3.3.0.<sup>64</sup>

199 To identify differentially abundant microbes, we utilized Random Forest and ANCOM  
200 v2.1.<sup>65</sup> Random forests were performed using the rfPermute v2.1.81 package in R. Random Forest  
201 analysis was performed to identify the top variables of importance for healthy to TA-bearing,  
202 healthy to serrated polyp-bearing, and TA to serrated polyp-bearing host comparisons.  
203 Significance testing for differentially abundant microbes was performed using Dunn's Kruskal-  
204 Wallis on the top variables of importance. Microbial abundances were averaged for each subject  
205 to avoid repeated measurements, and p-values were adjusted for false discovery rate. Random  
206 Forest out-of-box accuracy was assessed by plotting Random Forest proximity and confidence  
207 scores, using the proximityPlot and plotConfMat function within rfPermute. ANCOM v2.1 was  
208 performed on OTU tables to identify differentially abundant microbes between sample types while  
209 accounting for multiple samples per individual.

### 210 ***Functional Microbiome analysis:***

211 Functional annotation of shotgun sequences was performed by cross-assembling samples into  
212 contigs using MEGAHIT v1.1.1.<sup>66</sup> Contigs larger than 2,500 bp had open reading frames (ORFs)  
213 called by Prodigal v2.6.3.<sup>67</sup> The resulting ORFs were functionally annotated using eggNOG  
214 mapper v2, using the eggNOG v5.0 database.<sup>68</sup> Individual samples were aligned to annotated  
215 ORFs using bowtie2 v2.3.5.1 to obtain per-sample ORF abundances. Per sample ORF abundances  
216 were compiled into a single ORF abundance table using the pileup.sh script from BBMap v38.79.  
217 Principal coordinate analysis was performed by normalizing gene abundances using  
218 MicrobeCensus and the cmdscale function from vegan.<sup>69</sup> KEGG BRITE annotations were used to  
219 visualize the relative abundances of functional hierarchies. DESeq2 v1.2.6 was used to identify

220 differentially abundant microbial genes using the DESeq function in R.<sup>70</sup> Proximal and distal  
221 mucosal aspirates were processed through DESeq2 separately to avoid repeated measurements.  
222 Differentially abundant genes that were not present in at least 10% of subjects were removed from  
223 the analysis. The taxonomy of differentially abundant genes was resolved by aligning their protein  
224 sequences to the NCBI nr database using blastp.

## 225 **Results:**

### 226 ***Microbiomes of Mucosal and Lavage Samples are similar to each other but different from those*** 227 ***in Feces:***

228 To determine whether microbiomes varied between sample types, mucosal brushes,  
229 mucosal aspirates, and lavage aliquots were collected from 140 individuals during colonoscopy;  
230 38 of these individuals provided a fecal sample 4-6 weeks after their procedure (Figure 1). Using  
231 16S amplicon sequencing on a subset of individuals, we observed no significant differences in  
232 Shannon diversity or richness across mucosal brushes, mucosal aspirates, and lavage aliquots  
233 (linear mixed effects model (LME):  $p > 0.05$ , Figure 2A). PERMANOVA analysis of Bray-Curtis  
234 dissimilarities revealed that the individual explained the greatest amount of variation in  
235 microbiome composition ( $R^2 = 0.56$ ,  $p = 0.001$ ; Supplemental table 1). This analysis found no  
236 significant differences in the microbiomes associated with mucosal brushes, mucosal aspirates,  
237 and lavage aliquots from within the same individual ( $R^2 = 0.12$ ,  $p = 0.49$ ; Supplemental table 1).  
238 The lack of significance was consistent with no discernable clusters based on sample type (Figure  
239 2B). We were unable to identify any microbes whose abundances significantly differed across the  
240 three sampling methods, except for three ASVs; one from the *Gemellaceae* family and two  
241 *Streptococcus spp.*, whose abundances were all higher in mucosal aspirates compared to mucosal  
242 brushes (ANCOM2: FDR  $< 0.05$ ; Supplemental figure 1).

243 ITS2 sequencing was also performed on the same subset of samples to investigate the effect  
244 of sampling method on the fungal microbiome. We observed no differences in Shannon diversity  
245 or richness across mucosal brushes, mucosal aspirates, and lavage aliquots (LME:  $p > 0.05$ ,  
246 Supplemental figure 2). Like 16S amplicon data, PERMANOVA analysis of Bray-Curtis  
247 dissimilarities showed that the individual explained the greatest amount of variation in fungal  
248 community composition ( $R^2 = 0.28$ ,  $p < 0.001$ ), with no significant associations with fungal  
249 community composition and our three sampling methods ( $R^2 = 0.38$ ,  $p = 0.122$ ; Supplemental table  
250 3).

251 Following the collection of fecal samples, we performed shotgun sequencing on a second  
252 set of samples, representing 105 individuals. Mucosal brushes were excluded from the second  
253 sample set because a pilot shotgun sequencing run revealed these samples contained an large  
254 percentage of human-derived reads (Supplemental figure 3). Based on estimates of Shannon  
255 diversity and species richness, the microbiomes in fecal samples were significantly more diverse  
256 than those in the mucosal aspirates (LME:  $p = 0.007$  and  $p = 0.002$ , respectively) and marginally  
257 more diverse than those in lavage aliquots (LME:  $p = 0.053$  and  $p = 0.047$ , respectively; Figure  
258 2C). With respect to microbial beta diversity, the individual explained the greatest amount of  
259 variation in microbiome composition (PERMANOVA:  $R^2 = 0.75$ ,  $p < 0.001$ ; Supplemental table  
260 4). In addition, fecal samples had microbial communities that were distinct when compared to  
261 mucosal aspirates and lavage aliquots from the same individual, with sampling method explaining  
262 14% of variation in the microbiome (PERMANOVA:  $p = 0.001$ ; Figure 2D). Fecal samples had a  
263 mean relative abundance of 63% for Firmicutes, 27% for Bacteroides, 3.5% for Actinobacteria,  
264 and 4.5% for Proteobacteria. Mucosal aspirates and lavage aliquots were more similar and had a  
265 mean relative abundance of 73% and 75% for Firmicutes, 15% and 11% for Bacteroides, 4.7%

266 and 5.2% for Actinobacteria, and 4.0% and 6.6% for Proteobacteria, respectively (Supplemental  
267 figure 4). Differential abundance analysis of microbes revealed 44 OTUs that were significantly  
268 different between fecal samples and mucosal aspirates (ANCOM2: FDR < 0.05; Supplemental  
269 table 5). Six OTUs were differentially abundant between fecal samples and lavage aliquots  
270 (Supplemental table 6), and no OTUs were significantly different between mucosal aspirates and  
271 lavage aliquots (ANCOM2; FDR > 0.05).

272 ***The Microbiomes of Polyps and Opposite Wall Healthy Tissue are similar within Individuals:***

273 To identify any polyp-specific microbial biomarkers, 14 mucosal brush samples were  
274 collected from polyps and opposite wall healthy tissue and sequenced as part of the first sample  
275 set (Figure 3A). Based on 16S sequencing, we observed no significant differences in Shannon  
276 diversity or richness between polyp and opposite wall healthy tissue from within the same  
277 individual (Figure 3B). Similarly, there were no significant differences in beta-diversity across  
278 polyp and opposite wall healthy tissue pairs (PERMANOVA:  $R^2 = 0.18$ ,  $p = 0.62$ ; Figure 3C;  
279 Supplemental table 7). We were unable to identify any differentially abundant microbes between  
280 polyp and opposite wall tissue brushes. Microbiomes were mostly individualistic, with subject  
281 origin explaining 53% of the variance in microbiome composition (PERMANOVA:  $p = 0.005$ ;  
282 Figure 3D; Supplemental table 7). We detected significant associations between microbiome  
283 composition and colon side (right/proximal versus left/distal), with 16% of the variance in  
284 microbiome composition explained by the colon side (PERMANOVA:  $p = 0.003$ ; Supplemental  
285 table 7). Significant associations within the microbiome were observed when both polyp and  
286 opposite wall tissue pairs were categorized by subject type, explaining approximately 10% of  
287 variance (PERMANOVA:  $p = 0.03$ ; Supplemental table 7).

288 ***Tubular Adenoma-bearing, Serrated Polyp-bearing, and Healthy Individuals have distinct***  
289 ***Microbiomes:***

290 We next analyzed all samples from the first and second sample sets to ask whether the type  
291 of polyp an individual had (subject type) was significantly associated with microbial diversity and  
292 composition. In both 16S and shotgun data, we observed no significant differences between polyp-  
293 free, TA-bearing, and serrated polyp-bearing samples based on Shannon diversity or richness  
294 estimates (LME:  $p > 0.05$ ; Supplemental figure 5). In ITS data, we observed significantly increased  
295 Shannon diversity, but not richness, in samples from polyp-free individuals when compared to  
296 those from TA-bearing individuals (LME:  $p = 0.03$ ; Supplemental figure 5). Beta diversity analysis  
297 of 16S data from the first sample set demonstrated that subject type explained 5% and 2% of the  
298 variance associated with the microbiome, respectively (16S PERMANOVA:  $p = 0.001$ ;  
299 Supplemental table 1 and ITS PERMANOVA:  $p = 0.09$ ; Supplemental table 3). A similar result  
300 was observed in second sample set mucosal aspirates. We found significant associations between  
301 the microbiome and an individual's polyp type, explaining 2% of the variance observed  
302 (PERMANOVA:  $p = 0.001$ ; Supplemental table 4). This association between microbiome  
303 composition and polyp type was only observed in samples obtained directly from the mucosa and  
304 not in lavage aliquots (PERMANOVA:  $p > 0.05$ ; Supplemental table 8) or fecal samples  
305 (PERMANOVA:  $p > 0.05$ ; Supplement table 9).

306 Plotting the microbial relative abundances from shotgun mucosal aspirates revealed  
307 elevations of *Lachnospiraceae* and depletions of *Bacteroidaceae* in TA-bearing individuals  
308 (Figure 4A). Random Forest classification of shotgun sequences from healthy and TA-associated  
309 mucosal aspirates resulted in an out-of-box accuracy of approximately 86%, suggesting distinct  
310 microbial compositions between the two groups (Figure 4B). The top OTUs of importance for this

311 Random Forest classification included *Ruthenibacterium sp.*, *Tyzzarella* HGM12567,  
312 *Ruminococcus gnavus*, *Coprococcus comes*, and *Clostridium scindens* (Figure 4E). Differential  
313 abundance analysis revealed an increased abundance of *C. scindens* in TA mucosal aspirates when  
314 compared to serrated polyps (Dunn's Kruskal-Wallis: p-adjusted = 0.005) and healthy controls  
315 (Dunn's Kruskal-Wallis: p-adjusted = 0.016). *Tyzzarella* HGM12567 was also significantly  
316 enriched in TA mucosal aspirates when compared to healthy aspirates (Dunn's Kruskal-Wallis: p-  
317 adjusted = 0.01), but not serrated polyp aspirates (Dunn's Kruskal-Wallis: p-adjusted = 0.07).

318 Despite more similar microbial compositions, Random Forest classification of healthy and  
319 serrated polyp mucosal aspirates resulted in an out-of-box accuracy of approximately 87% (Figure  
320 4C). OTUs of importance for this Random Forest classification included *Eggerthella lenta*, *Dorea*  
321 *longicatena*, *Anaerostipes hadrus*, *Ruminococcus obeum*, and *DTU089 HGM12731* (Figure 4F).  
322 Differential abundance analysis revealed a significant depletion of *E. lenta* in shotgun mucosal  
323 aspirates from serrated polyp-bearing individuals compared to healthy (Dunn's Kruskal-Wallis:  $q$   
324 = 0.004) and TA-bearing individuals (Dunn's Kruskal-Wallis:  $q$  = 0.004). Lower abundances of  
325 *E. lenta* were also observed in serrated polyp mucosal aspirates from the first sample set, although  
326 the differences were not statistically significant (Supplemental figure 6).

327 To determine if the microbiome could be used to distinguish mucosal aspirates from TAs  
328 and serrated polyps, another Random Forest classification was performed, which produced an out-  
329 of-box accuracy of approximately 85% (Figure 4D). The top five variables of importance were *E.*  
330 *lenta*, *C. scindens*, *Ruthenibacterium sp.*, *Sellimonas sp.*, and *UBA7182 HGM12585*. SparCC  
331 correlation of *E. lenta* and *C. scindens* demonstrated that they significantly most positively  
332 correlated with one another (SparCC: pseudo- $p_1 < 0.05$ ; Figure G and H).

333 ***Microbiome Functional Potential is distinct across Sampling Methods and Subject Types:***



334 The functional characteristics of the shotgun sequence data were next explored using  
335 KEGG and eggNOG annotations. Based on KEGG BRITE hierarchies, we observed a high degree  
336 of functional conservation across metagenomes, spanning both sample and subject types  
337 (Supplemental figure 7). A principal coordinate analysis of individual gene abundances revealed  
338 a distinct cluster of fecal samples when compared to mucosal aspirates and lavage aliquots.  
339 PERMANOVA analysis of gene abundances confirmed an association between functional  
340 microbiome capacity and sampling methods, significantly explaining 10.9% of the observed  
341 variance (PERMANOVA:  $p = 0.001$ ; Supplemental table 10). In contrast, the individual of origin  
342 explained approximately 75% of the observed variance in the functional microbiome  
343 (PERMANOVA:  $p = 0.001$ ; Supplemental table 10).

344 Subject type was also significantly associated with functional gene composition,  
345 explaining 1.2% of the observed variance (PERMANOVA:  $p = 0.001$ ; Supplemental table 10).  
346 Differential abundance analysis revealed three microbial genes that varied across polyp-bearing  
347 and polyp-free controls. *SdaA*, a gene which encodes an L-serine dehydratase, was depleted in  
348 serrated mucosal aspirates when compared to polyp-free controls (Dunn's Kruskal-Wallis:  $p$ -  
349 adjusted  $< 0.001$ ) and TA mucosal aspirates (Dunn's Kruskal-Wallis:  $p$ -adjusted  $< 0.001$ , Figure  
350 5B). Taxonomic characterization of *sdaA* showed that it belonged to *E. lenta* (Blastp: E-value =  
351 0.0, per. identity = 99.81%). Next, an alpha-galactosidase in the glycoside hydrolase (GH) family  
352 31 was found to be depleted in serrated mucosal aspirates when compared to polyp-free mucosal  
353 aspirates (Dunn's Kruskal-Wallis:  $p$ -adjusted = 0.035), but not TA mucosal aspirates (Dunn's  
354 Kruskal-Wallis:  $p$ -adjusted = 0.22, Figure 5C). Lastly, the transporter-encoding *tonB* was enriched  
355 in polyp-free mucosal aspirates when compared to TA mucosal aspirates (Dunn's Kruskal-Wallis:  
356  $p$ -adjusted = 0.038), but not serrated mucosal aspirates (Dunn's Kruskal-Wallis:  $p$ -adjusted =

357 0.065; Figure 5D). Both GH31 (Blastp: E-value = 0.0, per. identity = 99.92%) and *tonB* (Blastp:  
358 E-value = 0.0, per. identity = 100%) belonged to *Phocaeicola massiliensis*.

## 359 **Discussion:**

### 360 ***Sampling Method and Microbiome Characterization:***

361 In this study we used direct and indirect methods to sample the colon to characterize the  
362 microbiomes of healthy and colorectal polyp-bearing individuals. Using amplicon sequencing, we  
363 did not observe significant differences in the diversity or composition of microbiomes in samples  
364 obtained directly from mucosal brushes and mucosal aspirates. In contrast, fecal samples were  
365 significantly more diverse and compositionally distinct when compared to mucosal aspirates.

366 Due to their ease of collection, fecal samples are commonly used to study the human  
367 microbiome in the context of CRC. Fecal samples poorly represent the microbiota adherent to the  
368 colon mucosa, and instead capture those found in the intestinal lumen.<sup>19,20</sup> Additionally, they do  
369 not provide information on the biogeography of the microbiome within the gastrointestinal  
370 tract.<sup>21,22</sup> These limitations suggest stool samples are not ideal for studying the microbiota adherent  
371 to colorectal polyps, which have less robust microbial signatures of dysbiosis than  
372 adenocarcinomas and carcinomas, and therefore would benefit from more direct sampling  
373 methods.

374 Using stool samples, Peters *et al.* found significant associations between the microbiota  
375 and distal conventional adenoma cases, but not proximal, hypothesizing that stool samples were a  
376 poor proxy for measuring the proximal microbiota.<sup>16</sup> Through direct sampling methods, we  
377 observed significant associations between the microbial composition and both proximal and distal  
378 TA cases using mucosal aspirates, supporting this hypothesis. Peters *et al.* also did not find  
379 significant differences in microbial diversity or composition between healthy controls and serrated

380 polyps, which predominantly develop in the proximal colon.<sup>16</sup> Using mucosal aspirates, but not  
381 fecal samples, we found compositional differences between serrated polyp cases and healthy  
382 controls. Together, these data suggest that mucosal brushes or aspirates, but not fecal samples, are  
383 sensitive enough to study the microbiome of colorectal polyps found within the proximal colon.  
384 These results contradict a study published by Yoon *et al.*, who did not find significant  
385 compositional differences in mucosa-associated gut microbiota among polyp-free,  
386 conventional adenoma, SSP, and CRC bearing individuals.<sup>17</sup> The authors did note, however, that  
387 this result was likely driven by the small sample size of the study, with only 6 samples per group,  
388 and 24 samples total. In contrast, we managed to find significant compositional differences in the  
389 mucosa-associated microbiome which could be used to distinguish individuals with and without  
390 polyps using more samples.

391 Compared to mucosal brushes, mucosal aspirates had a lower risk of damaging the host  
392 epithelium, provided larger collection volumes for downstream sample processing, and resulted in  
393 a lower proportion of human derived reads with shotgun sequencing. Because of these advantages,  
394 we recommend using mucosal aspirates rather than mucosal brushing for characterizing the  
395 microbiomes of colorectal polyps.

#### 396 ***Hyperlocal Microbiome Comparisons:***

397 Although the sample size was limited, direct sampling of polyp mucosa with brushes  
398 revealed no differences in the hyperlocal microbiome of polyp tissue versus opposite wall healthy  
399 tissue. As a result, we were unable to identify microbial biomarkers specific to SSPs or other polyp  
400 types. One factor which could have disrupted the potential hyperlocal differences in the gut  
401 microbiota is the colonoscopy preparation and lavage. As part of the preparation, individuals were  
402 advised to adhere to a low fiber, clear liquid diet 24 hours prior to colonoscopy. Dietary fiber is

403 important in maintaining the longitudinal and lateral organization of the gut microbiota within the  
404 colon, as mice on a low fiber diet show disrupted microbial organization.<sup>19</sup> Changes in diet can  
405 rapidly shift the composition of the gut microbiome, often within 24 hours, in both humans and  
406 mice.<sup>7,23,24</sup> A laxative-based cleansing and colonoscopy rinse was also performed, potentially  
407 obscuring the hyperlocal organization further. Nevertheless, significant compositional differences  
408 between the microbiomes of samples taken from the proximal and distal colon were observed,  
409 suggesting that broad microbial organization remained present in the gut after colonoscopy  
410 preparation and lavage.

#### 411 ***Microbiome Signatures of the CRC Carcinogenesis Pathways:***

412       Compositional differences were observed in the microbiome across TA-bearing, serrated  
413 polyp-bearing, and polyp-free individuals using mucosal aspirate sampling, but not fecal sampling.  
414 Based on mucosal aspirates, the microbiomes of serrated polyp-bearing individuals more closely  
415 resembled those of polyp-free controls rather than those from TA cases. Despite this, we still found  
416 significant differences in the microbial composition of serrated and polyp-free mucosal aspirates.  
417 These findings may suggest that the gut microbiome functions differently across the adenoma-  
418 carcinoma sequence and the serrated pathway. In the adenoma-carcinoma sequence, the gut  
419 microbiome exists in, and potentially contributes to, an inflammatory environment known to  
420 promote CRC development. For example, enterotoxigenic *Bacteroides fragilis* produces a  
421 metalloprotease that causes oxidative DNA damage and cleaves the tumor suppressor protein, E-  
422 cadherin.<sup>25-27</sup> Another CRC-associated microbe, pks+ *E. coli*, synthesizes colibactin that induces  
423 double stranded DNA breaks.<sup>28,29</sup>

424       Although we did not find any significant increases in the relative abundances of these CRC-  
425 associated microbes in our data, we did see an increased abundance of *C. scindens* and *Tyzzarella*

426 using mucosal aspirates in TA-bearing individuals. No dietary information was collected in this  
427 study, but it is possible that the increased abundance of *C. scindens* was influenced by a high fat  
428 diet. High fat diets stimulate increased primary bile acid concentrations above normal  
429 physiological concentrations.<sup>30</sup> Gut microbes, like *C. scindens*, can 7 $\alpha$ -dehydroxylate excess  
430 primary bile acids not absorbed by the small intestine into carcinogenic secondary bile acids.<sup>31,32</sup>  
431 High concentrations of bile acids can cause oxidative stress, nitrosative stress, DNA damage,  
432 apoptosis, and mutations.<sup>30</sup> Secondary bile acids also act as farnesoid X receptor antagonists,  
433 resulting in enhanced *wnt* signaling during the adenoma-carcinoma sequence.<sup>33</sup> With respect to  
434 *Tyzzarella*, this microbe has been found to be elevated in APC<sup>min+/-</sup> mice, which develop colitis-  
435 associated CRC, when compared to wild-type mice.<sup>34</sup> We also observed an increasing trend of *R.*  
436 *gnavus* in TA-associated mucosal aspirates, which has been previously associated with CRC and  
437 inflammatory bowel disease.<sup>35,36</sup>

438 Another CRC-associated microbe is *Fusobacterium nucleatum*, which can activate Wnt  
439 signaling by binding to host E-cadherin using its FadA adhesin to facilitate CRC development in  
440 the adenoma-carcinoma sequence.<sup>37</sup> As reviewed in DeDecker et al, *F. nucleatum* has also been  
441 implicated in the serrated pathway through its association with serrated pathway lesions and  
442 features, such as mismatch repair deficiency, MLH1 methylation, CpG island methylator  
443 phenotype, and high microsatellite instability.<sup>38</sup> A study by Rezasoltani et al. quantified the fecal  
444 abundance of *F. nucleatum* and seven other CRC-associated microbes across TA,  
445 villous/tubulovillous, HPP, SSP, and polyp-free individuals using qPCR.<sup>18</sup> Elevated levels of *F.*  
446 *nucleatum*, *E. faecalis*, *S. bovis*, enterotoxigenic *B. fragilis*, and *Porphyromonas* spp. were  
447 observed in TA and villous/tubulovillous groups, but not polyp-free, HPP, and SSP cases.<sup>18</sup> Here,  
448 we did not find differences in *F. nucleatum* abundances across HPPs, SSPs, TAs, and polyp-free

449 controls. Instead, we found that *E. lenta* was depleted in mucosal aspirates from serrated polyp  
450 bearing individuals.

451         Within the colon, *E. lenta* metabolizes inert plant lignans into bioactive enterolignans, such  
452 as enterolactone and enterodiol.<sup>39</sup> These enterolignans have anti-proliferative and anti-  
453 inflammatory effects, and help modulate estrogen signaling, lipid metabolism, and bile acid  
454 regulation.<sup>40</sup> They have also been associated with reduced cancer risk.<sup>40,41</sup> Interestingly, the *sdaA*  
455 gene, which was found to be depleted in serrated mucosal aspirates, was identified as belonging to  
456 *E. lenta*. This gene catalyzes the conversion of L-serine into pyruvate and ammonia during  
457 gluconeogenesis. It is not clear whether this enzyme is involved in enterolignan production in *E.*  
458 *lenta*, but *sdaA* in *Campylobacter jejuni* is required for avian gut colonization.<sup>42</sup> Further  
459 investigation is needed to determine *sdaA* is necessary for *E. lenta* colonization in the human gut.

460         Another microbial gene that was depleted in serrated mucosal aspirates was an alpha-  
461 galactosidase in the glycoside hydrolase family 31 from *Phocaeicola massiliensis*, formerly named  
462 *Bacteroides massiliensis*. These enzymes are carried by microbes to digest the glycosidic linkages  
463 that join plant fibers. *P. massiliensis* has been shown to utilize starch and porcine mucin O-linked  
464 glycans as sole carbon sources.<sup>43</sup> Diets rich in plant fiber, like starch, have been associated with  
465 decreased CRC risk.<sup>6,44</sup> Fiber is fermented by the intestinal microbiota to produce short chain fatty  
466 acids, including acetate, butyrate, and propionate. Butyrate is the primary energy source for  
467 colonocytes and has anti-inflammatory and anti-tumor properties.<sup>45-47</sup> Butyrate also is involved in  
468 the epigenetic expression of genes as a histone deacetylase inhibitor.<sup>48</sup> In the serrated pathway, the  
469 gene SLC5A8, which mediates short chain fatty acid uptake into colonic epithelial cells, is  
470 frequently inhibited via promoter methylation, suggesting that dietary fiber may be required for  
471 proper cellular epigenetic regulation.<sup>49</sup> Taken together, we hypothesize that decreased abundances

472 of *E. lenta*, *sdaA*, and GH31 in serrated polyp samples result from low-dietary fiber consumption,  
473 which leads to subsequent epigenetic modifications within colonocytes to promote serrated  
474 carcinogenesis. Nevertheless, more research is needed to elucidate the role of the gut microbiome  
475 during serrated carcinogenesis.

476 *TonB* from *P. massiliensis* is another gene which we observed to be increased in polyp-  
477 free controls. *TonB* transporters allow microbes to actively transport essential micronutrients, such  
478 as iron. Diets high in red meat consumption are rich in iron and have been associated with increased  
479 CRC risk.<sup>6</sup> It is possible that our polyp-free controls consumed less red meat, thus necessitating  
480 more *tonB* transporters. This contradicts a recent metaproteomic analysis of stool samples from  
481 healthy individuals and those with CRC, which found an increase of *tonB* in the CRC group.<sup>50</sup>

#### 482 **Conclusion:**

483 The complex and individualistic nature of the human gut microbiome has made it difficult  
484 to mechanistically link the microbiome with CRC carcinogenesis. By describing the association  
485 between the gut microbiota and serrated polyp development, our study aims to elucidate  
486 mechanistic targets for the epigenetic-based serrated pathway to CRC. In addition, our data  
487 underscores the importance of distinguishing between different pathways of colorectal  
488 carcinogenesis when investigating the gut microbiome. Finally, transitioning future microbiome  
489 studies to direct sampling methods will enable the discovery of previously unassociated microbes  
490 and novel mechanistic targets as demonstrated here.

491 **Declarations:**

492 ***Author contributions:***

493 Katrine L. Whiteson and William E. Karnes devised the study design with support from Lauren  
494 DeDecker. Subject recruitment was performed by William E. Karnes and Zachary Lu. Sample  
495 collection was performed by William E. Karnes, Lauren DeDecker, and Zachary Lu with guidance  
496 from Katrine L. Whiteson. Julio Avelar-Barragan, Bretton Coppedge, and Zachary Lu processed  
497 samples for data acquisition. Julio Avelar-Barragan performed the data analysis and wrote the  
498 manuscript with guidance from Katrine L. Whiteson.

499 ***Ethics approval:***

500 This study was approved by the Institutional Review Board (IRB) of the University of California,  
501 Irvine (HS# 2017-3869).

502 ***Funding details:***

503 This study was funded by institutional research grant #IRG-16-187-13 from the American  
504 Cancer Society.

505 ***Disclosure of interest:***

506 The authors declare no competing or conflicts of interest.

507 ***Data availability statement:***

508 Bash and R code for data processing and analysis is available on GitHub at:  
509 [https://github.com/Javelarb/ACS\\_polyp\\_study](https://github.com/Javelarb/ACS_polyp_study). Additional data and materials are available upon  
510 reasonable request.

511 ***Data deposition:***

512 Sequencing data is available on the Sequence Read Archive under the BioProject ID,  
513 PRJNA745329.



514 ***Acknowledgements:***

515 We would like to thank Claudia Weihe and Jennifer B.H Martiny for allowing us to borrow  
516 laboratory equipment and giving insightful feedback, Andrew Oliver and Jason A. Rothman for  
517 their bioinformatic expertise, Clark Hendrickson for his assistance with sample preparation, and  
518 Heather Maughan for her helpful edits and suggestions.

519 **REFERENCES:**

- 520 1. Sung, Hyuna, Jacques Ferlay, Rebecca L. Siegel, Mathieu Laversanne, Isabelle  
521 Soerjomataram, Ahmedin Jemal, and Freddie Bray. “Global Cancer Statistics 2020:  
522 GLOBOCAN Estimates of Incidence and Mortality Worldwide for 36 Cancers in 185  
523 Countries.” *CA: A Cancer Journal for Clinicians* 71, no. 3 (May 2021): 209–49.  
524 <https://doi.org/10.3322/caac.21660>.
- 525 2. Stoffel, Elena M., Pamela B. Mangu, Stephen B. Gruber, Stanley R. Hamilton, Matthew F.  
526 Kalady, Michelle Wan Yee Lau, Karen H. Lu, Nancy Roach, and Paul J. Limburg. “Hereditary  
527 Colorectal Cancer Syndromes: American Society of Clinical Oncology Clinical Practice  
528 Guideline Endorsement of the Familial Risk–Colorectal Cancer: European Society for Medical  
529 Oncology Clinical Practice Guidelines.” *Journal of Clinical Oncology* 33, no. 2 (January 10,  
530 2015): 209–17. <https://doi.org/10.1200/JCO.2014.58.1322>.
- 531 3. Collins, S.M., E. Denou, E.F. Verdu, and P. Bercik. “The Putative Role of the Intestinal  
532 Microbiota in the Irritable Bowel Syndrome.” *Digestive and Liver Disease* 41, no. 12  
533 (December 2009): 850–53. <https://doi.org/10.1016/j.dld.2009.07.023>.
- 534 4. Verdam, Froukje J., Susana Fuentes, Charlotte de Jonge, Erwin G. Zoetendal, Runi Erbil, Jan  
535 Willem Greve, Wim A. Buurman, Willem M. de Vos, and Sander S. Rensen. “Human  
536 Intestinal Microbiota Composition Is Associated with Local and Systemic Inflammation in  
537 Obesity: Obese Gut Microbiota and Inflammation.” *Obesity* 21, no. 12 (December 2013):  
538 E607–15. <https://doi.org/10.1002/oby.20466>.
- 539 5. Song, Mingyang, Wendy S. Garrett, and Andrew T. Chan. “Nutrients, Foods, and Colorectal  
540 Cancer Prevention.” *Gastroenterology* 148, no. 6 (May 2015): 1244–1260.e16.  
541 <https://doi.org/10.1053/j.gastro.2014.12.035>.

- 542 6. “Diet, Nutrition, Physical Activity, and Colorectal Cancer.” World Cancer Research  
543 Fund/American Institute for Cancer Research. Continuous Update Project Expert Report,  
544 2018. [dietandcancerreport.org](http://dietandcancerreport.org).
- 545 7. David, Lawrence A., Corinne F. Maurice, Rachel N. Carmody, David B. Gootenberg, Julie E.  
546 Button, Benjamin E. Wolfe, Alisha V. Ling, et al. “Diet Rapidly and Reproducibly Alters the  
547 Human Gut Microbiome.” *Nature* 505, no. 7484 (January 2014): 559–63.  
548 <https://doi.org/10.1038/nature12820>.
- 549 8. Engen, Phillip A., Stefan J. Green, Robin M. Voigt, Christopher B. Forsyth, and Ali  
550 Keshavarzian. “The Gastrointestinal Microbiome: Alcohol Effects on the Composition of  
551 Intestinal Microbiota.” *Alcohol Research: Current Reviews* 37, no. 2 (2015): 223–36.
- 552 9. Ley, Ruth E. “Obesity and the Human Microbiome.” *Current Opinion in Gastroenterology* 26,  
553 no. 1 (January 2010): 5–11. <https://doi.org/10.1097/MOG.0b013e328333d751>.
- 554 10. Mailing, Lucy J., Jacob M. Allen, Thomas W. Buford, Christopher J. Fields, and Jeffrey A.  
555 Woods. “Exercise and the Gut Microbiome: A Review of the Evidence, Potential Mechanisms,  
556 and Implications for Human Health.” *Exercise and Sport Sciences Reviews* 47, no. 2 (April  
557 2019): 75–85. <https://doi.org/10.1249/JES.0000000000000183>.
- 558 11. Nakanishi, Yuki, Maria T. Diaz-Meco, and Jorge Moscat. “Serrated Colorectal Cancer: The  
559 Road Less Travelled?” *Trends in Cancer* 5, no. 11 (November 2019): 742–54.  
560 <https://doi.org/10.1016/j.trecan.2019.09.004>.
- 561 12. Pino, Maria S., and Daniel C. Chung. “The Chromosomal Instability Pathway in Colon  
562 Cancer.” *Gastroenterology* 138, no. 6 (May 2010): 2059–72.  
563 <https://doi.org/10.1053/j.gastro.2009.12.065>.

- 564 13. De Palma, Fatima, Valeria D'Argenio, Jonathan Pol, Guido Kroemer, Maria Maiuri, and  
565 Francesco Salvatore. "The Molecular Hallmarks of the Serrated Pathway in Colorectal  
566 Cancer." *Cancers* 11, no. 7 (July 20, 2019): 1017. <https://doi.org/10.3390/cancers11071017>.
- 567 14. Kahi, Charles J. "Screening Relevance of Sessile Serrated Polyps." *Clinical Endoscopy* 52, no.  
568 3 (May 31, 2019): 235–38. <https://doi.org/10.5946/ce.2018.112>.
- 569 15. Delker, Don A., Brett M. McGettigan, Priyanka Kanth, Stelian Pop, Deborah W. Neklason,  
570 Mary P. Bronner, Randall W. Burt, and Curt H. Hagedorn. "RNA Sequencing of Sessile  
571 Serrated Colon Polyps Identifies Differentially Expressed Genes and Immunohistochemical  
572 Markers." Edited by Frank T. Kolligs. *PLoS ONE* 9, no. 2 (February 12, 2014): e88367.  
573 <https://doi.org/10.1371/journal.pone.0088367>.
- 574 16. Peters, Brandilyn A., Christine Dominianni, Jean A. Shapiro, Timothy R. Church, Jing Wu,  
575 George Miller, Elizabeth Yuen, et al. "The Gut Microbiota in Conventional and Serrated  
576 Precursors of Colorectal Cancer." *Microbiome* 4, no. 1 (December 2016): 69.  
577 <https://doi.org/10.1186/s40168-016-0218-6>.
- 578 17. Yoon, Hyuk, Nayoung Kim, Ji Hyun Park, Yong Sung Kim, Jongchan Lee, Hyoung Woo Kim,  
579 Yoon Jin Choi, et al. "Comparisons of Gut Microbiota Among Healthy Control, Patients With  
580 Conventional Adenoma, Sessile Serrated Adenoma, and Colorectal Cancer." *Journal of*  
581 *Cancer Prevention* 22, no. 2 (June 30, 2017): 108–14.  
582 <https://doi.org/10.15430/JCP.2017.22.2.108>.
- 583 18. Rezasoltani, Sama, Hamid Asadzadeh Aghdaei, Hossein Dabiri, Abbas Akhavan Sepahi,  
584 Mohammad Hossein Modarressi, and Ehsan Nazemalhosseini Mojarad. "The Association  
585 between Fecal Microbiota and Different Types of Colorectal Polyp as Precursors of Colorectal

- 586 Cancer.” *Microbial Pathogenesis* 124 (November 2018): 244–49.  
587 <https://doi.org/10.1016/j.micpath.2018.08.035>.
- 588 19. Riva, Alessandra, Orest Kuzyk, Erica Forsberg, Gary Siuzdak, Carina Pfann, Craig Herbold,  
589 Holger Daims, Alexander Loy, Benedikt Warth, and David Berry. “A Fiber-Deprived Diet  
590 Disturbs the Fine-Scale Spatial Architecture of the Murine Colon Microbiome.” *Nature*  
591 *Communications* 10, no. 1 (December 2019): 4366. [https://doi.org/10.1038/s41467-019-](https://doi.org/10.1038/s41467-019-12413-0)  
592 [12413-0](https://doi.org/10.1038/s41467-019-12413-0).
- 593 20. Chen, Weiguang, Fanlong Liu, Zongxin Ling, Xiaojuan Tong, and Charlie Xiang. “Human  
594 Intestinal Lumen and Mucosa-Associated Microbiota in Patients with Colorectal Cancer.”  
595 Edited by Antonio Moschetta. *PLoS ONE* 7, no. 6 (June 28, 2012): e39743.  
596 <https://doi.org/10.1371/journal.pone.0039743>.
- 597 21. Eckburg, P. B. “Diversity of the Human Intestinal Microbial Flora.” *Science* 308, no. 5728  
598 (June 10, 2005): 1635–38. <https://doi.org/10.1126/science.1110591>.
- 599 22. Tropini, Carolina, Kristen A. Earle, Kerwyn Casey Huang, and Justin L. Sonnenburg. “The  
600 Gut Microbiome: Connecting Spatial Organization to Function.” *Cell Host & Microbe* 21, no.  
601 4 (April 2017): 433–42. <https://doi.org/10.1016/j.chom.2017.03.010>.
- 602 23. Wu, G. D., J. Chen, C. Hoffmann, K. Bittinger, Y.-Y. Chen, S. A. Keilbaugh, M. Bewtra, et  
603 al. “Linking Long-Term Dietary Patterns with Gut Microbial Enterotypes.” *Science* 334, no.  
604 6052 (October 7, 2011): 105–8. <https://doi.org/10.1126/science.1208344>.
- 605 24. Turnbaugh, P. J., V. K. Ridaura, J. J. Faith, F. E. Rey, R. Knight, and J. I. Gordon. “The Effect  
606 of Diet on the Human Gut Microbiome: A Metagenomic Analysis in Humanized Gnotobiotic  
607 Mice.” *Science Translational Medicine* 1, no. 6 (November 11, 2009): 6ra14–6ra14.  
608 <https://doi.org/10.1126/scitranslmed.3000322>.

- 609 25. Haghi, Fakhri, Elshan Goli, Bahman Mirzaei, and Habib Zeighami. “The Association between  
610 Fecal Enterotoxigenic *B. Fragilis* with Colorectal Cancer.” *BMC Cancer* 19, no. 1 (December  
611 2019): 879. <https://doi.org/10.1186/s12885-019-6115-1>.
- 612 26. Ulger Toprak, N., A. Yagci, B.M. Gulluoglu, M.L. Akin, P. Demirkalem, T. Celenk, and G.  
613 Soyletir. “A Possible Role of *Bacteroides Fragilis* Enterotoxin in the Aetiology of Colorectal  
614 Cancer.” *Clinical Microbiology and Infection* 12, no. 8 (August 2006): 782–86.  
615 <https://doi.org/10.1111/j.1469-0691.2006.01494.x>.
- 616 27. Cheng, Wai Teng, Haresh Kumar Kantilal, and Fabian Davamani. “The Mechanism of  
617 *Bacteroides Fragilis* Toxin Contributes to Colon Cancer Formation.” *The Malaysian Journal*  
618 *of Medical Sciences: MJMS* 27, no. 4 (July 2020): 9–21.  
619 <https://doi.org/10.21315/mjms2020.27.4.2>.
- 620 28. Nougayrède, Jean-Philippe, Stefan Homburg, Frédéric Taieb, Michèle Boury, Elzbieta  
621 Brzuszkiewicz, Gerhard Gottschalk, Carmen Buchrieser, Jörg Hacker, Ulrich Dobrindt, and  
622 Eric Oswald. “*Escherichia Coli* Induces DNA Double-Strand Breaks in Eukaryotic Cells.”  
623 *Science (New York, N.Y.)* 313, no. 5788 (August 11, 2006): 848–51.  
624 <https://doi.org/10.1126/science.1127059>.
- 625 29. Pleguezuelos-Manzano, Cayetano, Jens Puschhof, Axel Rosendahl Huber, Arne van Hoeck,  
626 Henry M. Wood, Jason Nomburg, Carino Gurjao, et al. “Mutational Signature in Colorectal  
627 Cancer Caused by Genotoxic Pks+ *E. Coli*.” *Nature* 580, no. 7802 (April 2020): 269–73.  
628 <https://doi.org/10.1038/s41586-020-2080-8>.
- 629 30. Ajouz, Hana, Deborah Mukherji, and Ali Shamseddine. “Secondary Bile Acids: An  
630 Underrecognized Cause of Colon Cancer.” *World Journal of Surgical Oncology* 12, no. 1  
631 (2014): 164. <https://doi.org/10.1186/1477-7819-12-164>.

- 632 31. Ridlon, Jason M., and Phillip B. Hylemon. “Identification and Characterization of Two Bile  
633 Acid Coenzyme A Transferases from *Clostridium Scindens*, a Bile Acid 7 $\alpha$ -Dehydroxylating  
634 Intestinal Bacterium.” *Journal of Lipid Research* 53, no. 1 (January 2012): 66–76.  
635 <https://doi.org/10.1194/jlr.M020313>.
- 636 32. Marion, Solenne, Nicolas Studer, Lyne Desharnais, Laure Menin, Stéphane Escrig, Anders  
637 Meibom, Siegfried Hapfelmeier, and Rizlan Bernier-Latmani. “In Vitro and in Vivo  
638 Characterization of *Clostridium Scindens* Bile Acid Transformations.” *Gut Microbes* 10, no.  
639 4 (July 4, 2019): 481–503. <https://doi.org/10.1080/19490976.2018.1549420>.
- 640 33. Ocvirk, Soeren, and Stephen J.D. O’Keefe. “Dietary Fat, Bile Acid Metabolism and Colorectal  
641 Cancer.” *Seminars in Cancer Biology*, October 2020, S1044579X2030208X.  
642 <https://doi.org/10.1016/j.semcancer.2020.10.003>.
- 643 34. Zhang, Yong, Xiao-lan Wang, Min Zhou, Chao Kang, He-dong Lang, Meng-ting Chen, Suo-  
644 cheng Hui, Bin Wang, and Man-tian Mi. “Crosstalk between Gut Microbiota and Sirtuin-3 in  
645 Colonic Inflammation and Tumorigenesis.” *Experimental & Molecular Medicine* 50, no. 4  
646 (April 2018): 1–11. <https://doi.org/10.1038/s12276-017-0002-0>.
- 647 35. Hall, Andrew Brantley, Moran Yassour, Jenny Sauk, Ashley Garner, Xiaofang Jiang, Timothy  
648 Arthur, Georgia K. Lagoudas, et al. “A Novel Ruminococcus Gnavus Clade Enriched in  
649 Inflammatory Bowel Disease Patients.” *Genome Medicine* 9, no. 1 (November 28, 2017): 103.  
650 <https://doi.org/10.1186/s13073-017-0490-5>.
- 651 36. Burns, Michael B., Emmanuel Montassier, Juan Abrahante, Sambhawa Priya, David E.  
652 Niccum, Alexander Khoruts, Timothy K. Starr, Dan Knights, and Ran Blekhman. “Colorectal  
653 Cancer Mutational Profiles Correlate with Defined Microbial Communities in the Tumor

- 654 Microenvironment.” *PLoS Genetics* 14, no. 6 (June 2018): e1007376.  
655 <https://doi.org/10.1371/journal.pgen.1007376>.
- 656 37. Gholizadeh, Pourya, Hosein Eslami, and Hossein Samadi Kafil. “Carcinogenesis Mechanisms  
657 of *Fusobacterium Nucleatum*.” *Biomedicine & Pharmacotherapy* 89 (May 2017): 918–25.  
658 <https://doi.org/10.1016/j.biopha.2017.02.102>.
- 659 38. DeDecker, Lauren, Bretton Coppedge, Julio Avelar-Barragan, William Karnes, and Katrine  
660 Whiteson. “Microbiome Distinctions between the CRC Carcinogenic Pathways.” *Gut*  
661 *Microbes*, January 15, 2021, 1–12. <https://doi.org/10.1080/19490976.2020.1854641>.
- 662 39. Bess, Elizabeth N., Jordan E. Bisanz, Fauna Yarza, Annamarie Bustion, Barry E. Rich,  
663 Xingnan Li, Seiya Kitamura, et al. “Genetic Basis for the Cooperative Bioactivation of Plant  
664 Lignans by *Eggerthella Lenta* and Other Human Gut Bacteria.” *Nature Microbiology* 5, no. 1  
665 (January 2020): 56–66. <https://doi.org/10.1038/s41564-019-0596-1>.
- 666 40. Webb, Amy L., and Marjorie L. McCullough. “Dietary Lignans: Potential Role in Cancer  
667 Prevention.” *Nutrition and Cancer* 51, no. 2 (March 2005): 117–31.  
668 [https://doi.org/10.1207/s15327914nc5102\\_1](https://doi.org/10.1207/s15327914nc5102_1).
- 669 41. Adlercreutz, Herman. “Lignans and Human Health.” *Critical Reviews in Clinical Laboratory*  
670 *Sciences* 44, no. 5–6 (January 2007): 483–525. <https://doi.org/10.1080/10408360701612942>.
- 671 42. Velayudhan, Jyoti, Michael A. Jones, Paul A. Barrow, and David J. Kelly. “Serine Catabolism  
672 via an Oxygen-Labile L-Serine Dehydratase Is Essential for Colonization of the Avian Gut by  
673 *Campylobacter Jejuni*.” *Infection and Immunity* 72, no. 1 (January 2004): 260–68.  
674 <https://doi.org/10.1128/IAI.72.1.260-268.2004>.
- 675 43. Pudlo, Nicholas A., Karthik Urs, Supriya Suresh Kumar, J. Bruce German, David A. Mills,  
676 and Eric C. Martens. “Symbiotic Human Gut Bacteria with Variable Metabolic Priorities for



- 677 Host Mucosal Glycans.” Edited by Vanessa Sperandio. *MBio* 6, no. 6 (December 31, 2015).  
678 <https://doi.org/10.1128/mBio.01282-15>.
- 679 44. Aune, D., D. S. M. Chan, R. Lau, R. Vieira, D. C. Greenwood, E. Kampman, and T. Norat.  
680 “Dietary Fibre, Whole Grains, and Risk of Colorectal Cancer: Systematic Review and Dose-  
681 Response Meta-Analysis of Prospective Studies.” *BMJ* 343, no. nov10 1 (November 11, 2011):  
682 d6617–d6617. <https://doi.org/10.1136/bmj.d6617>.
- 683 45. Donohoe, Dallas R., Nikhil Garge, Xinxin Zhang, Wei Sun, Thomas M. O’Connell, Maureen  
684 K. Bunger, and Scott J. Bultman. “The Microbiome and Butyrate Regulate Energy Metabolism  
685 and Autophagy in the Mammalian Colon.” *Cell Metabolism* 13, no. 5 (May 4, 2011): 517–26.  
686 <https://doi.org/10.1016/j.cmet.2011.02.018>.
- 687 46. Hague, Angela, Douglas J. E. Elder, Diane J. Hicks, and Christos Paraskeva. “Apoptosis in  
688 Colorectal Tumour Cells: Induction by the Short Chain Fatty Acids Butyrate, Propionate and  
689 Acetate and by the Bile Salt Deoxycholate.” *International Journal of Cancer* 60, no. 3 (January  
690 27, 1995): 400–406. <https://doi.org/10.1002/ijc.2910600322>.
- 691 47. Hamer, H. M., D. Jonkers, K. Venema, S. Vanhoutvin, F. J. Troost, and R.-J. Brummer.  
692 “Review Article: The Role of Butyrate on Colonic Function.” *Alimentary Pharmacology &*  
693 *Therapeutics* 27, no. 2 (October 26, 2007): 104–19. [https://doi.org/10.1111/j.1365-](https://doi.org/10.1111/j.1365-2036.2007.03562.x)  
694 [2036.2007.03562.x](https://doi.org/10.1111/j.1365-2036.2007.03562.x).
- 695 48. Davie, James R. “Inhibition of Histone Deacetylase Activity by Butyrate.” *The Journal of*  
696 *Nutrition* 133, no. 7 (July 1, 2003): 2485S-2493S. <https://doi.org/10.1093/jn/133.7.2485S>.
- 697 49. Goldstein, Neal S. “Serrated Pathway and APC (Conventional)-Type Colorectal Polyps:  
698 Molecular-Morphologic Correlations, Genetic Pathways, and Implications for Classification.”

- 699 *American Journal of Clinical Pathology* 125, no. 1 (January 2006): 146–53.  
700 <https://doi.org/10.1309/87BD0C6UCGUG236J>.
- 701 50. Long, Shuping, Yi Yang, Chengpin Shen, Yiwen Wang, Anmei Deng, Qin Qin, and Liang  
702 Qiao. “Metaproteomics Characterizes Human Gut Microbiome Function in Colorectal  
703 Cancer.” *Npj Biofilms and Microbiomes* 6, no. 1 (December 2020): 14.  
704 <https://doi.org/10.1038/s41522-020-0123-4>.
- 705 51. Looby, Caitlin I., Mia R. Maltz, and Kathleen K. Treseder. “Belowground Responses to  
706 Elevation in a Changing Cloud Forest.” *Ecology and Evolution* 6, no. 7 (April 2016): 1996–  
707 2009. <https://doi.org/10.1002/ece3.2025>.
- 708 52. Bruinsma, Stephen, Joshua Burgess, Daniel Schlingman, Agata Czyz, Natalie Morrell,  
709 Catherine Ballenger, Heather Meinholz, et al. “Bead-Linked Transposomes Enable a  
710 Normalization-Free Workflow for NGS Library Preparation.” *BMC Genomics* 19, no. 1  
711 (December 2018): 722. <https://doi.org/10.1186/s12864-018-5096-9>.
- 712 53. Bolyen, Evan, Jai Ram Rideout, Matthew R. Dillon, Nicholas A. Bokulich, Christian C. Abnet,  
713 Gabriel A. Al-Ghalith, Harriet Alexander, et al. “Reproducible, Interactive, Scalable and  
714 Extensible Microbiome Data Science Using QIIME 2.” *Nature Biotechnology* 37, no. 8  
715 (August 2019): 852–57. <https://doi.org/10.1038/s41587-019-0209-9>.
- 716 54. Callahan, Benjamin J, Paul J McMurdie, Michael J Rosen, Andrew W Han, Amy Jo A Johnson,  
717 and Susan P Holmes. “DADA2: High-Resolution Sample Inference from Illumina Amplicon  
718 Data.” *Nature Methods* 13, no. 7 (July 2016): 581–83. <https://doi.org/10.1038/nmeth.3869>.
- 719 55. McDonald, Daniel, Morgan N Price, Julia Goodrich, Eric P Nawrocki, Todd Z DeSantis,  
720 Alexander Probst, Gary L Andersen, Rob Knight, and Philip Hugenholtz. “An Improved  
721 Greengenes Taxonomy with Explicit Ranks for Ecological and Evolutionary Analyses of

- 722 Bacteria and Archaea.” *The ISME Journal* 6, no. 3 (March 2012): 610–18.  
723 <https://doi.org/10.1038/ismej.2011.139>.
- 724 56. Bushnell, Brian. “BBMap: A Fast, Accurate, Splice-Aware Aligner.” Lawrence Berkeley  
725 National Lab.(LBNL), 2014.
- 726 57. Cantu, Vito Adrian, Jeffrey Sadural, and Robert Edwards. “PRINSEQ++, a Multi-Threaded  
727 Tool for Fast and Efficient Quality Control and Preprocessing of Sequencing Datasets.”  
728 Preprint. PeerJ Preprints, February 27, 2019. <https://doi.org/10.7287/peerj.preprints.27553v1>.
- 729 58. Langmead, Ben, and Steven L Salzberg. “Fast Gapped-Read Alignment with Bowtie 2.”  
730 *Nature Methods* 9, no. 4 (April 2012): 357–59. <https://doi.org/10.1038/nmeth.1923>.
- 731 59. Nayfach, Stephen, Zhou Jason Shi, Rekha Seshadri, Katherine S. Pollard, and Nikos C.  
732 Kyrpides. “New Insights from Uncultivated Genomes of the Global Human Gut Microbiome.”  
733 *Nature* 568, no. 7753 (April 2019): 505–10. <https://doi.org/10.1038/s41586-019-1058-x>.
- 734 60. Salazar, Guillem. *EcolUtils: Utilities for Community Ecology Analysis*. (version 0.1).  
735 <https://github.com/GuillemSalazar/EcolUtils>, 2019.
- 736 61. Oksanen, Jari, F. Guillaume Blanchet, Michael Friendly, Roeland Kindt, Pierre Legendre, Dan  
737 McGlinn, Peter R. Minchin, et al. *Vegan: Community Ecology Package*. (version R package  
738 version 2.5-6), 2019. <https://CRAN.R-project.org/package=vegan>.
- 739 62. Pinheiro, J, D Bates, S DebRoy, D Sarkar, and R Core Team. *Nlme: Linear and Nonlinear*  
740 *Mixed Effects Models*. (version R package version 3.1-148), 2020. [https://CRAN.R-](https://CRAN.R-project.org/package=nlme)  
741 [project.org/package=nlme](https://CRAN.R-project.org/package=nlme).
- 742 63. Friedman, Jonathan, and Eric J. Alm. “Inferring Correlation Networks from Genomic Survey  
743 Data.” Edited by Christian von Mering. *PLoS Computational Biology* 8, no. 9 (September 20,  
744 2012): e1002687. <https://doi.org/10.1371/journal.pcbi.1002687>.

- 745 64. Wickham, H. *Ggplot2: Elegant Graphics for Data Analysis*. (version 3.3.0). Springer-Verlag  
746 New York, 2016.
- 747 65. Mandal, Siddhartha, Will Van Treuren, Richard A. White, Merete Eggesbø, Rob Knight, and  
748 Shyamal D. Peddada. “Analysis of Composition of Microbiomes: A Novel Method for  
749 Studying Microbial Composition.” *Microbial Ecology in Health & Disease* 26, no. 0 (May 29,  
750 2015). <https://doi.org/10.3402/mehd.v26.27663>.
- 751 66. Li, Dinghua, Ruibang Luo, Chi-Man Liu, Chi-Ming Leung, Hing-Fung Ting, Kunihiko  
752 Sadakane, Hiroshi Yamashita, and Tak-Wah Lam. “MEGAHIT v1.0: A Fast and Scalable  
753 Metagenome Assembler Driven by Advanced Methodologies and Community Practices.”  
754 *Methods* 102 (June 2016): 3–11. <https://doi.org/10.1016/j.ymeth.2016.02.020>.
- 755 67. Hyatt, Doug, Gwo-Liang Chen, Philip F LoCascio, Miriam L Land, Frank W Larimer, and  
756 Loren J Hauser. “Prodigal: Prokaryotic Gene Recognition and Translation Initiation Site  
757 Identification.” *BMC Bioinformatics* 11, no. 1 (December 2010): 119.  
758 <https://doi.org/10.1186/1471-2105-11-119>.
- 759 68. Huerta-Cepas, Jaime, Damian Szklarczyk, Davide Heller, Ana Hernández-Plaza, Sofia K  
760 Forslund, Helen Cook, Daniel R Mende, et al. “EggNOG 5.0: A Hierarchical, Functionally and  
761 Phylogenetically Annotated Orthology Resource Based on 5090 Organisms and 2502  
762 Viruses.” *Nucleic Acids Research* 47, no. D1 (January 8, 2019): D309–14.  
763 <https://doi.org/10.1093/nar/gky1085>.
- 764 69. Nayfach, Stephen, and Katherine S Pollard. “Average Genome Size Estimation Improves  
765 Comparative Metagenomics and Sheds Light on the Functional Ecology of the Human  
766 Microbiome.” *Genome Biology* 16, no. 1 (December 2015): 51.  
767 <https://doi.org/10.1186/s13059-015-0611-7>.

768 70. Love, Michael I, Wolfgang Huber, and Simon Anders. “Moderated Estimation of Fold Change  
769 and Dispersion for RNA-Seq Data with DESeq2.” *Genome Biology* 15, no. 12 (December  
770 2014): 550. <https://doi.org/10.1186/s13059-014-0550-8>.

771 **Figure legends:**

772 ***Figure 1: Study design.***

773 A total of 140 different individuals were recruited for this study, including 50 healthy/polyp-free  
774 individuals, 45 with tubular adenomas, and 33 with serrated polyps (HPP, TSA, or SSP). For the  
775 remaining 12 individuals, 11 had unknown pathology and one had an adenocarcinoma. Multiple  
776 samples were taken from each subject during colonoscopy. This included mucosal brushes  
777 (orange), mucosal aspirates (yellow), and lavage aliquots (purple). Fecal samples (brown) were  
778 collected from participants four to six weeks post-colonoscopy. DNA extraction and sequencing  
779 produced two sample sets. The first sample set had a median age of 60, a median BMI of 25, and  
780 was 57% male and 43% female. The second sample set had a median age of 65, a median BMI of  
781 25, and was 50% male, 40% female, and 10% unknown/other. Some individuals appeared in both  
782 sample sets.

783 **Figure 2: Microbiomes of Mucosal and Lavage Samples are similar to each other but different**  
784 **from those in Feces.**

785 **A and C)** Shannon diversity and richness estimates across mucosal aspirates (yellow), mucosal  
786 brushes (orange), lavage aliquots (purple), and fecal samples (brown). The first sample set was  
787 sequenced using 16S sequencing (**A**), while the second sample set was sequenced using shotgun  
788 sequencing (**C**). **B and D)** Non-metric multidimensional scaling of Bray-Curtis dissimilarities in  
789 the first (**B**) and second (**D**) sample sets. Each point corresponds to a single sample with multiple  
790 samples per individual. The individual of origin is denoted numerically within each point. The  
791 number of samples per sample type and subject category are annotated parenthetically. Significant  
792 comparisons ( $p < 0.05$ ) are denoted by an asterisk (\*).

793 **Figure 3: The Microbiomes of Polyps and Opposite Wall Healthy Tissue are similar within**  
794 **Individuals.**

795 **A)** An illustration of the sampling strategy used to characterize the hyperlocal differences in the  
796 microbial community of polyps (red) and opposite wall healthy tissue (green). Brush samples were  
797 sequenced as part of the first sample set using 16S sequencing. **B)** Shannon diversity and richness  
798 estimates of mucosal brushes from polyp and opposite wall healthy tissue. **C)** Non-metric  
799 multidimensional scaling of Bray-Curtis dissimilarities of polyp and opposite wall healthy tissue  
800 brushes. The individual of origin is denoted numerically within each point. The shape of each point  
801 denotes the right (proximal) and left (distal) side of the colon. **D)** The relative abundance of the  
802 top ten microbial genera across all samples. Samples are grouped by each individual and labeled  
803 by polyp type, where tubular adenoma = TA, hyperplastic polyp = HPP, and sessile serrated polyp  
804 = SSP.



805 **Figure 4: Tubular Adenoma-bearing, Serrated Polyp-bearing, and Healthy Individuals have**  
806 **distinct Microbiomes.**

807 **A)** The top seven most abundant microbial families across all samples from the second sample set.  
808 The number of samples per sampling method and subject type is annotated parenthetically. **B-D)**  
809 Non-metric multi-dimensional scaling of random forest proximity scores per sample using only  
810 mucosal aspirates from the second sample set. Central points are colored by the known subject  
811 type. The outer circles represent predicted subject type as determined by the Random Forest. The  
812 out-of-box accuracy percentage for each Random Forest classification is embedded within each  
813 graph. **E-F)** The relative abundance of the top five variables of importance in second sample set  
814 mucosal aspirates for healthy vs. TA (**E**) and healthy vs. serrated (**F**) Random Forest comparisons.  
815 Significant comparisons ( $p$ -adjusted  $< 0.05$ ) are denoted by an asterisk (\*). **G-H)** The top ten most  
816 significantly correlated microbes for *C. scindens* (**G**) and *E. lenta* (**H**) as determined by sparCC  
817 correlation across all second sample set samples (pseudo- $p_1 < 0.05$ ).

818 **Figure 5: Microbiome Functional Potential is distinct across Sampling Methods and Subject**  
819 **Types.**

820 **A)** Principal coordinate analysis of gene Bray-Curtis dissimilarities across second sample set  
821 mucosal aspirates, lavage aliquots, and fecal samples. **B-D)** The abundance of DESeq2 normalized  
822 reads across each subject type in second sample set mucosal aspirates for the genes *sdaA* (**B**),  
823 *GH31* (**C**), and *tonB* (**D**). The number of samples per sampling method and subject type are  
824 annotated parenthetically. Significant comparisons (p-adjusted < 0.05) are denoted by an asterisk  
825 (\*).

826

827 **Main figures:**

828 **Figure 1: Study design**

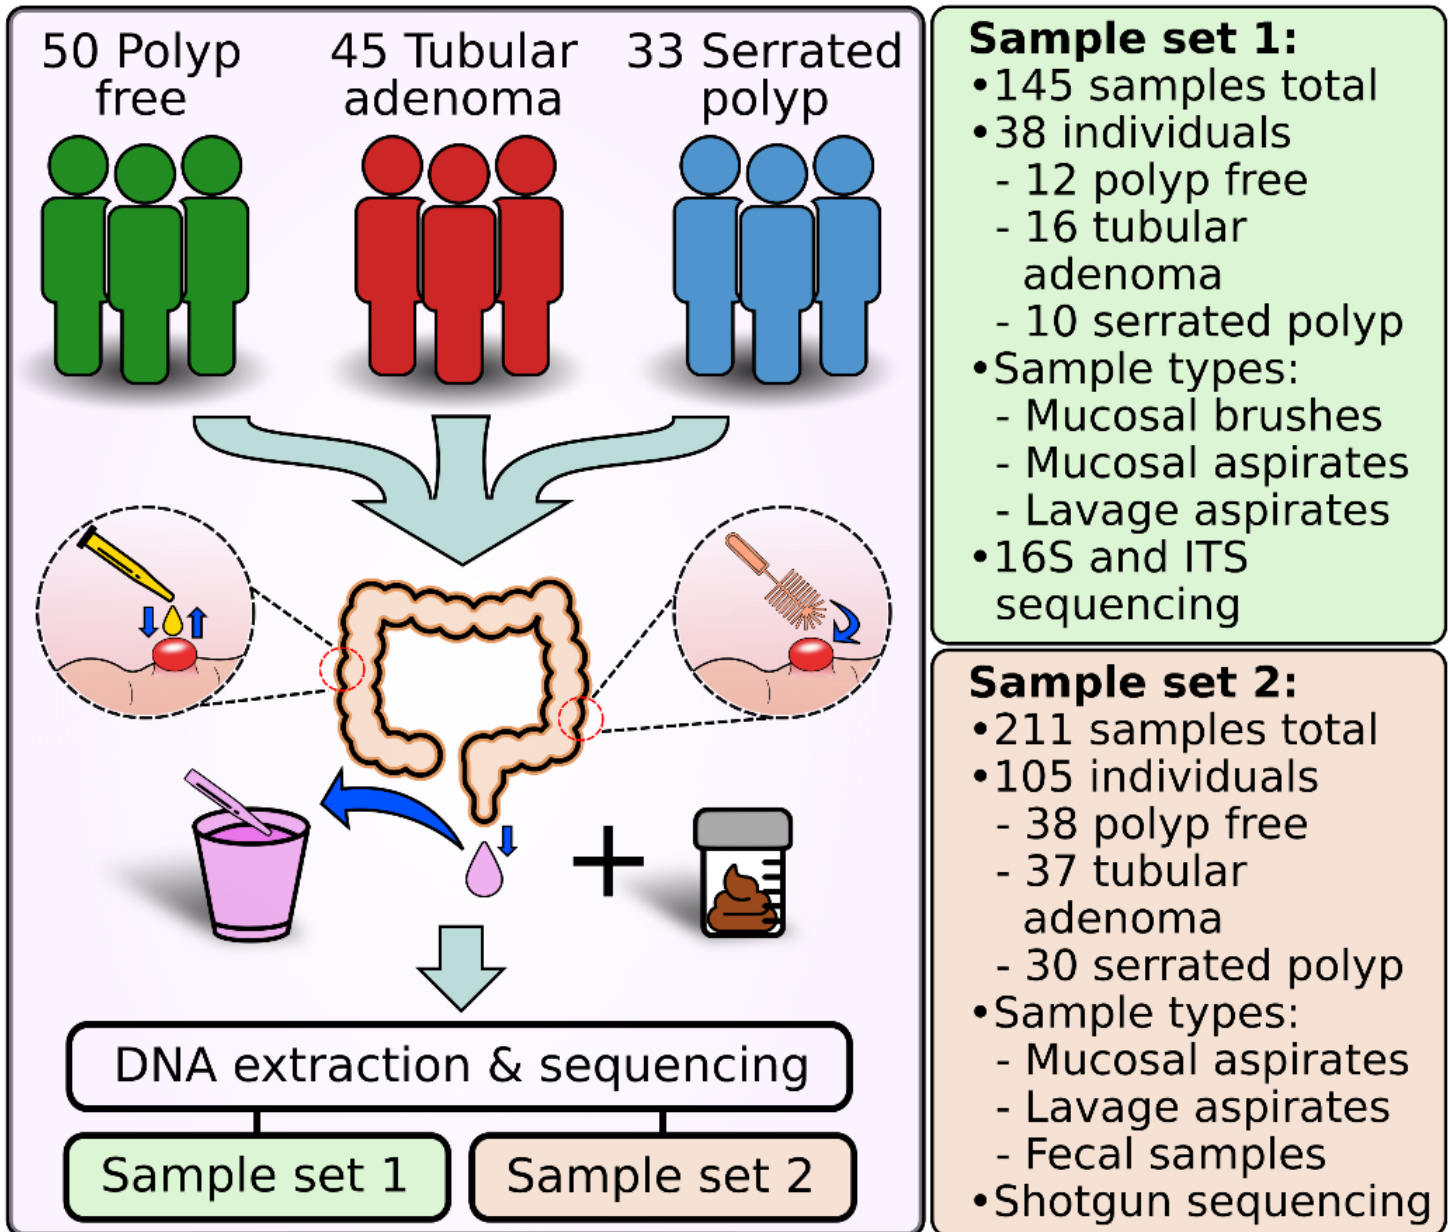

830 **Figure 2: Microbiomes of Mucosal and Lavage Samples are similar to each other but different**  
 831 **from those in Feces.**

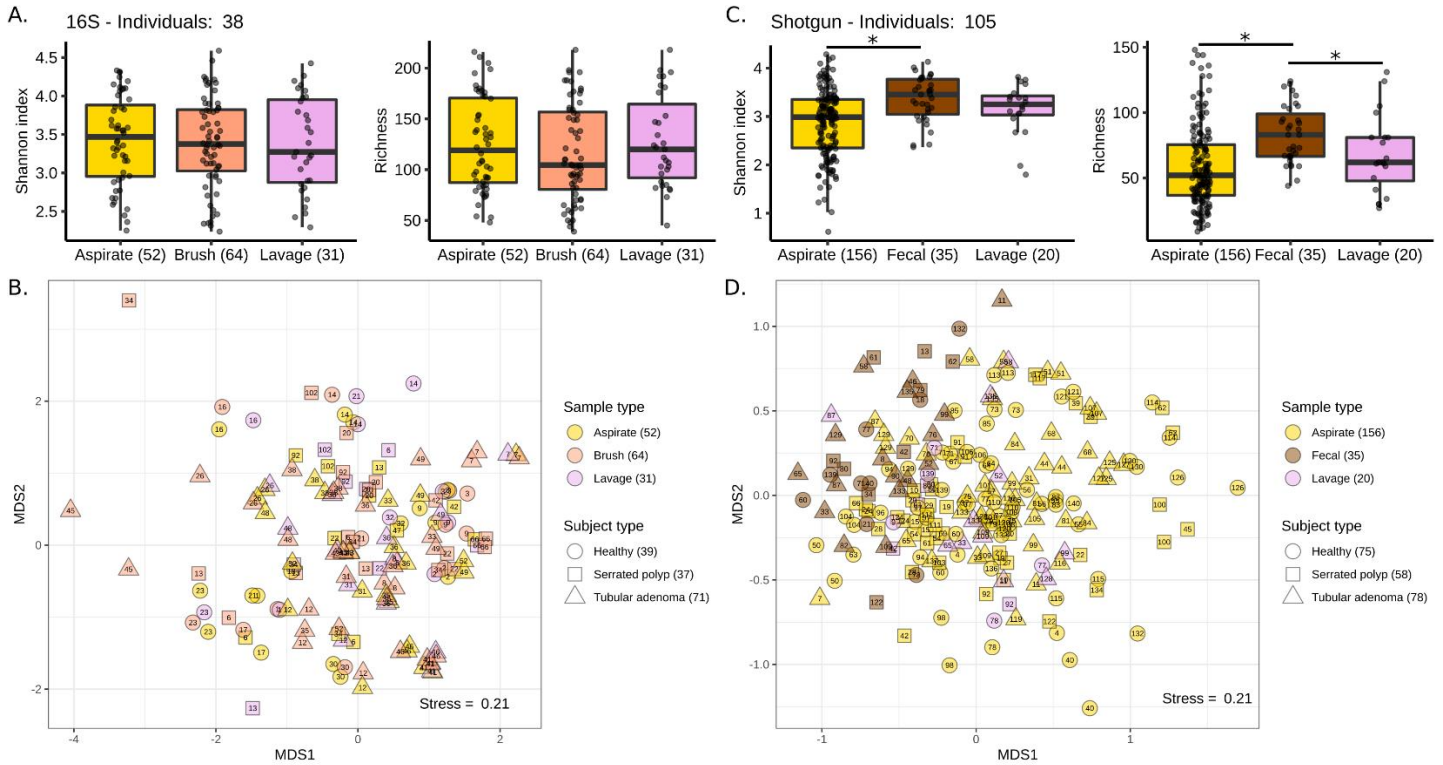

833

834 **Figure 3: The Microbiomes of Polyps and Opposite Wall Healthy Tissue are similar within**  
 835 **Individuals.**

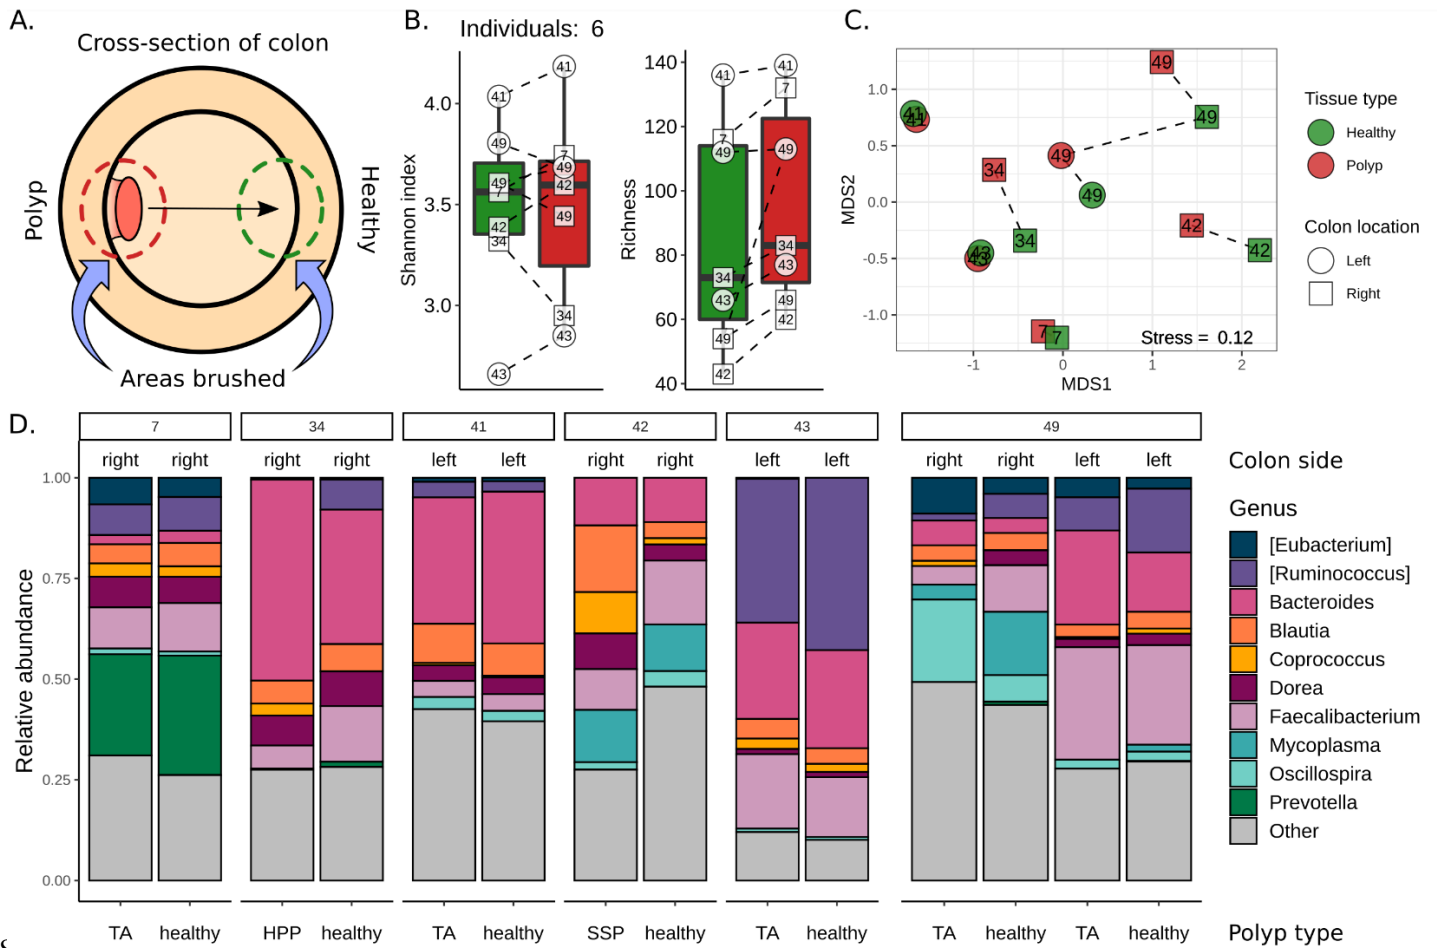

837 ***Figure 4: Tubular Adenoma-bearing, Serrated Polyp-bearing, and Healthy Individuals have***  
838 ***distinct Microbiomes.***

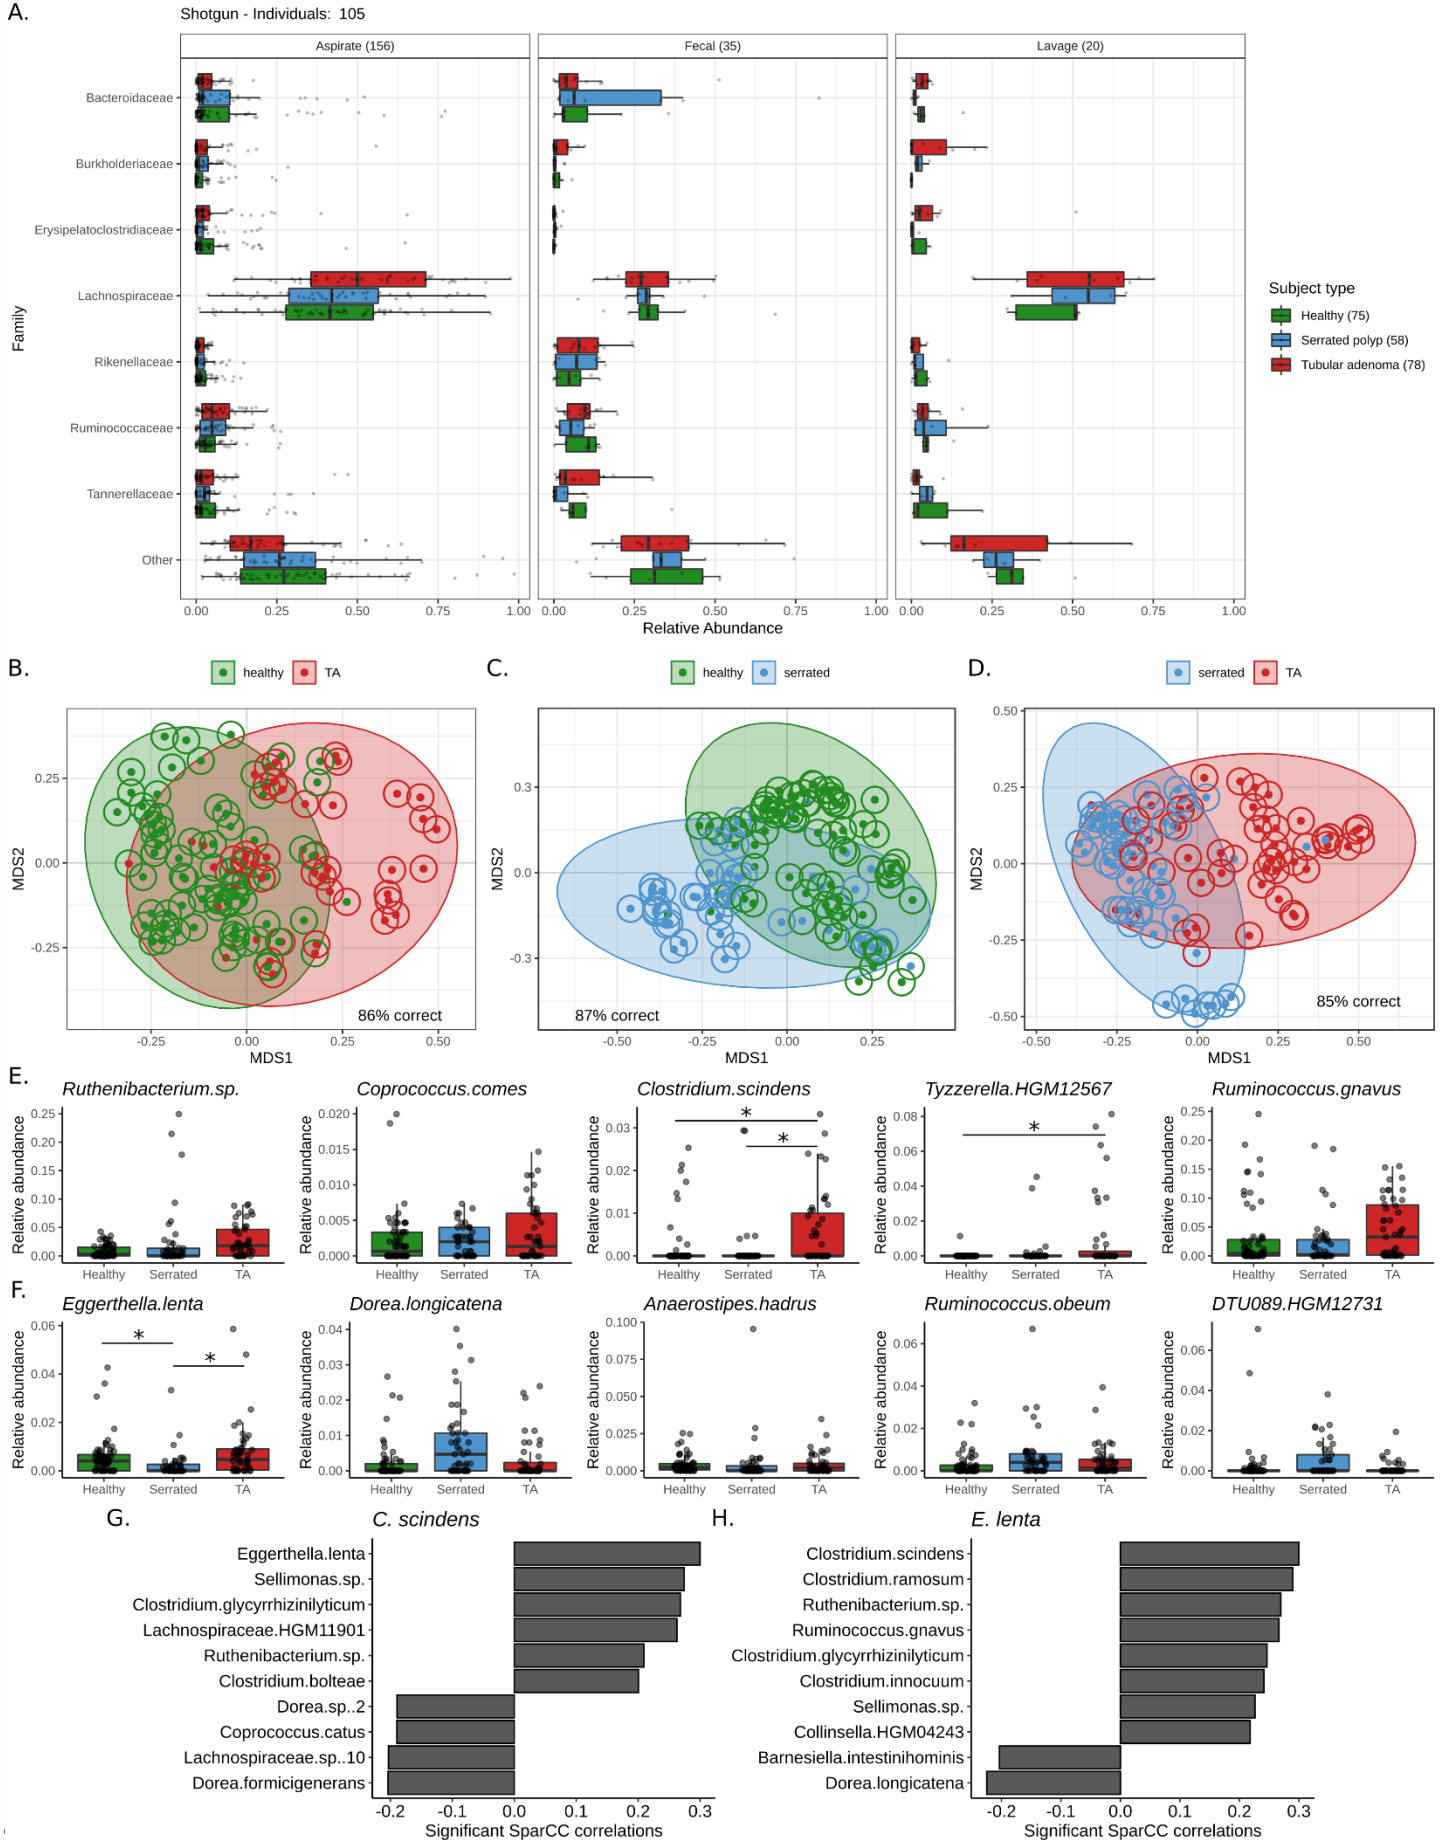

840 **Figure 5: Microbiome Functional Potential is distinct across Sampling Methods and Subject**  
841 **Types.**

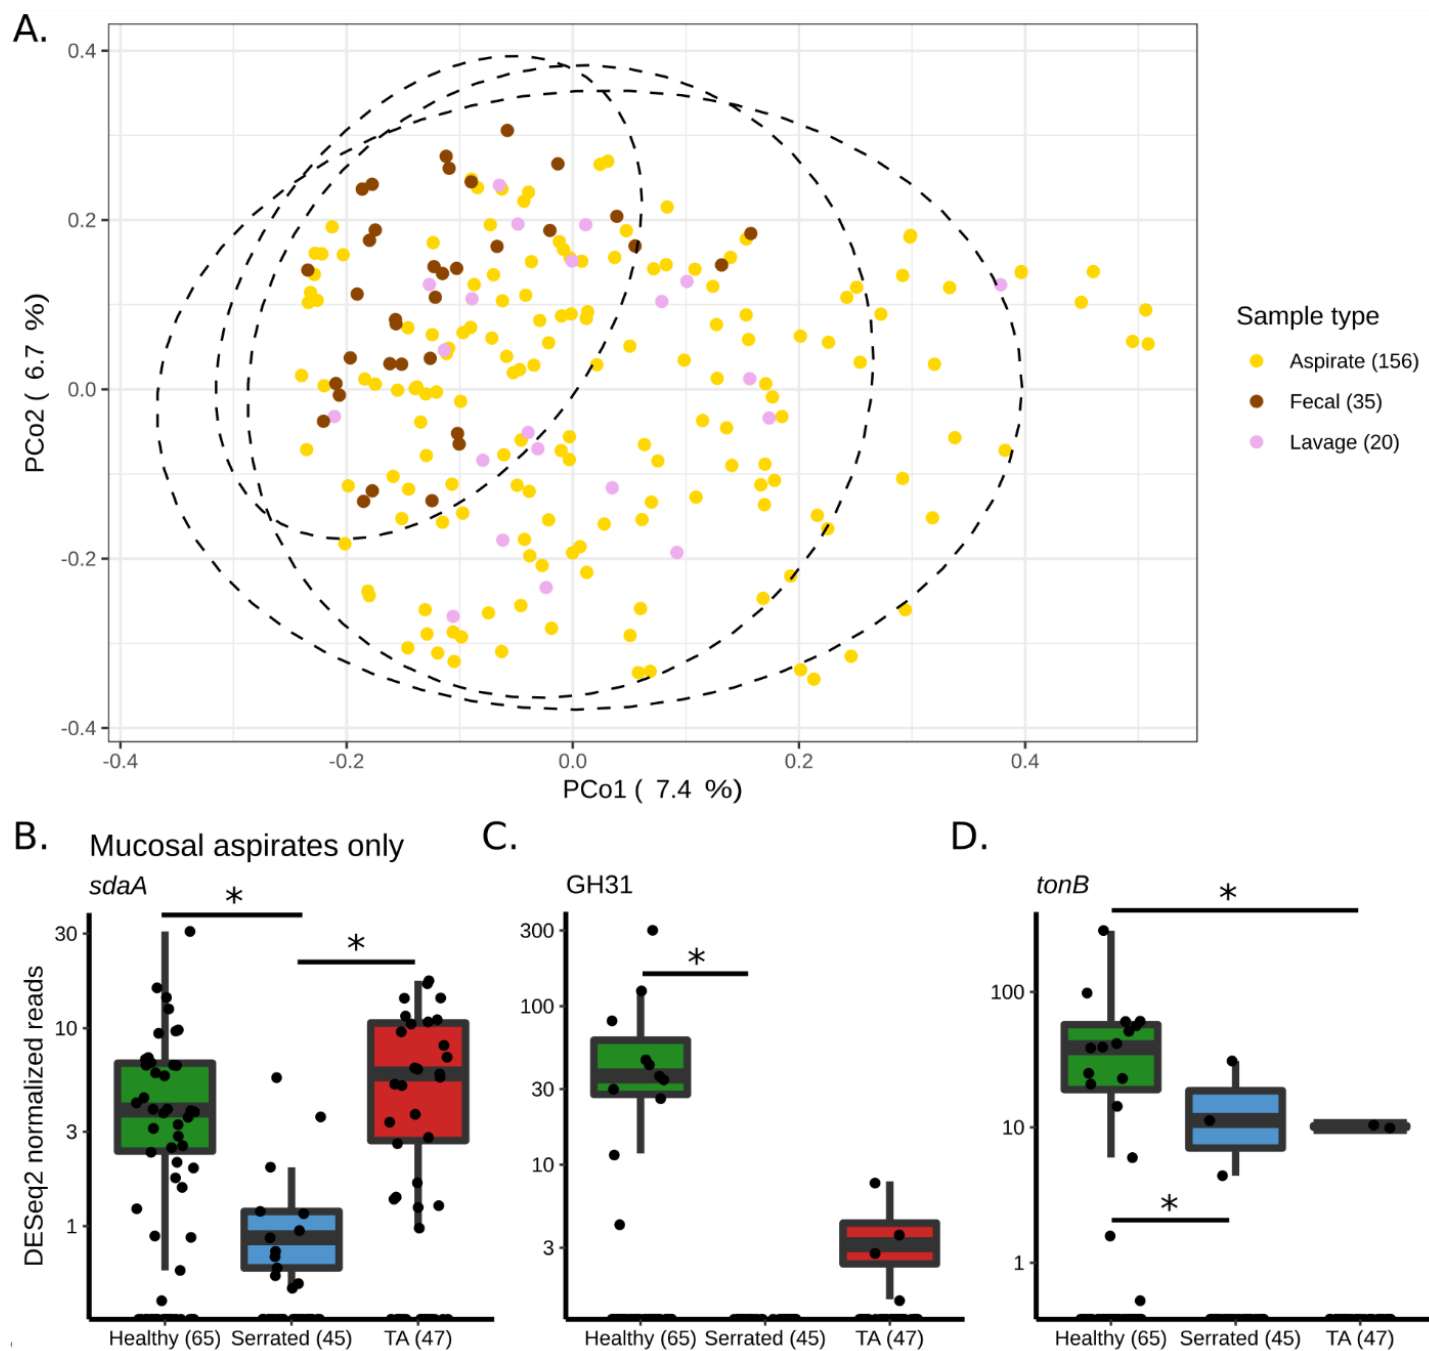

Source: http://biorxiv.org/content/10.1101/2021.07.20.453135v1.full.pdf
