1 **Title: Distinct Colon Mucosa Microbiomes associated with Tubular Adenomas and**  
2 **Serrated Polyps**

3

4 **Authors:** Julio Avelar-Barragan\*, Lauren DeDecker\*\*, Zachary Lu\*\*, Bretton Coppedge\*,  
5 William E. Karnes\*\*, Katrine L. Whiteson\*

6

7 \* School of Biological Sciences, University of California, Irvine

8 \*\* School of Medicine, University of California, Irvine.

9

10 **Corresponding author:**

11 Julio Avelar-Barragan

12 [javelarb@uci.edu](mailto:javelarb@uci.edu)

13 3315 McGaugh Hall

14 Department of Molecular Biology and Biochemistry

15 Irvine, CA 92697

16 **Keywords:** Colorectal cancer, polyps, human, gut, microbiome, serrated, tubular, adenoma

17

18 **Abbreviations:**

|     |                              |
|-----|------------------------------|
| CRC | Colorectal cancer            |
| APC | Adenomatous polyposis coli   |
| HPP | Hyperplastic polyp           |
| TSA | Traditional serrated adenoma |
| SSP | Sessile serrated polyp       |
| SP  | Serrated polyp               |
| TA  | Tubular adenoma              |
| OTU | Operational taxonomic unit   |
| ASV | Amplicon sequence variant    |
| ORF | Open reading frame           |
| LME | Linear mixed effects model   |
| RF  | Random Forest                |

19

20 **Abstract:**

21

22 **Background:** Colorectal cancer is the second most deadly and third most common cancer in the  
23 world. Its development is heterogenous, with multiple mechanisms of carcinogenesis. Two  
24 distinct mechanisms include the adenoma-carcinoma sequence and the serrated pathway. The gut  
25 microbiome has been identified as a key player in the adenoma-carcinoma sequence, but its role  
26 in serrated carcinogenesis is less clear. In this study, we characterized the gut microbiome of 140  
27 polyp-free and polyp-bearing individuals using colon mucosa and fecal samples to determine if  
28 microbiome composition was associated with each of the two key pathways.

29 **Results:** We discovered significant differences between the microbiomes of colon mucosa and  
30 fecal samples, with sample type explaining 14% of the variation observed in the microbiome.  
31 Multiple mucosal samples were collected from each individual to investigate whether the gut  
32 microbiome differed between polyp and healthy intestinal tissue, but no differences were found.  
33 Colon mucosa sampling revealed that the microbiomes of individuals with tubular adenomas and  
34 serrated polyps were significantly different from each other and polyp-free individuals,  
35 explaining 2-10% of the variance in the microbiome. Further analysis revealed differential  
36 abundances of 6 microbes and 1,143 microbial genes across tubular adenoma, serrated polyp,  
37 and polyp-free cases.

38 **Conclusion:** By directly sampling the colon mucosa and distinguishing between the different  
39 developmental pathways of colorectal cancer, this study helps characterize potential mechanistic  
40 targets for serrated carcinogenesis. This research also provides insight into multiple microbiome  
41 sampling strategies by assessing each method's practicality and effect on microbial community  
42 composition.

43 **Introduction:**

44 Colorectal cancer (CRC) is the second most deadly and third most common cancer  
45 globally, accounting for over 900,000 deaths in 2020.<sup>1</sup> The etiologies of CRC are multifactorial,  
46 with only 5-10% of cases being attributable to hereditary germline mutations.<sup>2</sup> Significant risk  
47 factors include diets high in red meat and low in fiber, obesity, physical inactivity, drug and  
48 alcohol usage, and chronic bowel inflammation.<sup>3-6</sup> Each of these factors is associated with  
49 compositional and functional changes in the collective community of bacteria, fungi, archaea,  
50 and viruses that inhabit the colon.<sup>7-10</sup> Commonly referred to as the gut microbiome, this  
51 community of microorganisms has been identified as a potential regulator of CRC initiation and  
52 progression.

53 Colorectal polyp formation precedes cancer development and is influenced by various  
54 environmental factors and host genetics. Polyps most commonly progress into malignancy  
55 through the adenoma-carcinoma sequence.<sup>11</sup> This pathway is characterized by chromosomal  
56 instability and mutations in the adenomatous polyposis coli (APC) gene, KRAS oncogene, and  
57 TP53 tumor suppressor gene.<sup>12</sup> Alternatively, 15 to 30% of CRCs develop through the serrated  
58 pathway.<sup>13</sup> This pathway is characterized by the epigenetic hypermethylation of gene promoters  
59 to produce a CpG island methylator phenotype.<sup>13</sup> In addition to the epigenetic inactivation of  
60 tumor suppressor genes, BRAF or KRAS mutations are also common.<sup>13</sup> The serrated pathway  
61 often results in the production of hyperplastic polyps (HPPs), traditional serrated adenomas  
62 (TSAs), and sessile serrated polyps (SSPs).<sup>14</sup> Premalignant polyps from both pathways can be  
63 screened for and removed during colonoscopy to prevent CRC formation, but incomplete polyp  
64 resection or escaped detection can result in the development of interval cancers. Compared to  
65 other colorectal polyps, SSPs are disproportionately responsible for interval cancers, as their flat

66 morphology makes them difficult to detect.<sup>15</sup> Additional detection methods, such as SSP-specific  
67 biomarkers, would assist with CRC prevention.

68         One potential avenue for polyp-specific biomarker discovery is the gut microbiota. SSPs  
69 often overexpress mucin forming genes, like MUC6, MUC5aC, MUC17, and MUC2, producing  
70 a mucus cap, which may harbor unique, mucin-degrading microbes.<sup>16</sup> Finding microbiome  
71 alterations in patients consistent with the presence of SSPs would enable gastroenterologists to  
72 personalize their technique and screening frequency for these higher risk patients. Additionally,  
73 elucidating the microbiome alterations specific to the adenoma-carcinoma sequence or the  
74 serrated pathway would help better understand the mechanisms of how particular microbes, their  
75 metabolites, and dysbiosis may contribute to colorectal carcinogenesis.

76         Studies comparing the microbiomes of these two pathways with healthy controls have yet  
77 to discover differences between healthy individuals and those with serrated polyps.<sup>17-19</sup> One  
78 reason for this may be the dominant use of stool for characterizing the microbiome, which does  
79 not accurately represent microbes adherent to the intestinal epithelium.<sup>20,21</sup> In this regard, we  
80 hypothesized that colon mucosa samples would more accurately reflect the composition of  
81 microbes intimately associated with colorectal polyps. To investigate this, and the role of the  
82 microbiome in the adenoma-carcinoma and serrated pathways, we used multiple sampling  
83 techniques to obtain microbiome samples from colorectal polyps. Samples were collected during  
84 and after colonoscopy from healthy individuals or those with tubular adenomas (TAs), HPPs, or  
85 SSPs. When possible, samples from the same individual were collected from polyps and the  
86 healthy colon epithelium opposite from these polyps. Stool samples were also collected 4-6  
87 weeks after colonoscopy. We used a combination of amplicon (16S and ITS) and shotgun  
88 sequencing to characterize the microbial communities of samples. The purpose of our work was

89 to 1) develop and compare microbiome sampling methods during colonoscopy; 2) determine  
90 whether microbiomes differ between polyp and healthy tissue samples within the same  
91 individual; and 3) identify microbiome members or genes specific to CRC precursors in the  
92 adenoma-carcinoma sequence versus the serrated pathway. Our key hypothesis was that there  
93 would be distinct differences between the microbiomes of individuals with tubular adenomas  
94 versus serrated polyps.

## 95 **Methods and Materials:**

### 96 *Subject Recruitment and Criteria:*

97 Individuals who presented for colonoscopy with indications of screening for, or a prior history  
98 of, colorectal polyps were asked to participate in the study. Written and informed consent was  
99 obtained from each subject and was required for participation. Subjects who were pregnant, had  
100 taken antibiotics within 6 weeks of colonoscopy, or with known inflammatory bowel diseases,  
101 were excluded. In total, 140 individuals were recruited for this study. Of the 140 individuals, 50  
102 were found to be polyp-free, 45 had one or more TAs, 33 had polyps originating from the  
103 serrated pathway (HPPs and SSPs), and 12 had unknown or other pathologies (Figure 1).

### 104 *Colonoscopy Preparation, Procedure, and Sample Collection:*

105 Before colonoscopy, subjects were asked to adhere to a clear liquid diet for 24 hours. Bowel  
106 cleansing was done using Miralax, or polyethylene glycol with electrolytes administered as a  
107 split dose, 12 and 5 hours before the procedure. Sample collection focused on two direct and two  
108 indirect microbiome sampling methods (Figure 1). The first direct sampling method involved  
109 brushing the mucosa of colon tissue during colonoscopy (Method #1 in Figure 1). Since mucosal  
110 brushes can potentially damage or agitate the intestine, we also employed a novel method of  
111 direct microbiome sampling in which colonoscopy washing fluid was sprayed directly on to the

112 target mucosa and immediately re-suctioned into a storage vial (Method #2 in Figure 1).  
113 Participants with suspected polyps had additional mucosal washing aspirates taken near the  
114 polyp, as well as brushings of the polyp and opposite wall of the polyp to study the microbial  
115 microenvironment. When more than one polyp was found, the largest polyp was targeted for  
116 mucosal brushing and aspirate sampling. The first indirect sampling method involved collecting  
117 an aliquot of the post-colonoscopy lavage fluid (Method #3 in Figure 1). This lavage fluid was  
118 produced from rinsing the wall of the colon throughout the procedure and was collected in a  
119 catch can outside the subject. All samples were collected in sterile cryogenic tubes and placed on  
120 ice until the colonoscopy procedure was finished. Afterwards, the samples were stored at -80°C.  
121 Additional information collected included indication for procedure, age, sex, ethnicity, BMI,  
122 family history, and findings, including the size, shape, location, and pathology of all polyps  
123 sampled.

#### 124 *Patient-directed Collection of Fecal Samples:*

125 For the second indirect microbiome sampling method, subjects were encouraged to send follow-  
126 up fecal samples four to six weeks post-colonoscopy (Method #4 in Figure 1). Subjects were  
127 provided with a fecal collection kit, which contained collection equipment, prepaid shipping  
128 labels, and Zymo DNA/RNA shield preservation buffer (R1101). Subjects who complied were  
129 compensated \$20 USD. Samples were returned via the United States Postal Service. After  
130 arrival, samples were stored at -80°C. Thirty-eight fecal samples were returned, bringing our  
131 total number of samples collected to 1,883. A summary of the sample types can be found in  
132 Supplemental Table 1.

#### 133 *Polyp and Subject Type Classification:*

134 Polyp biopsies collected during colonoscopy were sent to a pathologist for classification. This  
135 information was then recorded for the corresponding mucosal brush aspirate samples. Pathology  
136 reports were also used to broadly categorize all samples collected from an individual by their  
137 polyp pathology. We referred to this as the ‘subject type’ and the three categories were polyp-  
138 free subjects, TA-bearing subjects, and serrated polyp-bearing (SP-bearing) subjects, which  
139 included both HPPs and SSPs. For example, if a sample was taken from healthy intestinal tissue  
140 of an individual who was found to have a TA, that sample and all others from the same  
141 individual would be included in the TA-bearing subject type. Three individuals had both a TA  
142 and an SSP and were classified as SP-bearing subjects.

#### 143 ***DNA Extraction:***

144 Two separate DNA extractions were performed in this study, yielding two different sample sets  
145 (Table 1). Sample set 1 DNA extractions included mucosal brushes, mucosal aspirates, and  
146 lavage aspirates only. Sample set 2 DNA extractions occurred later and included mucosal  
147 aspirates, lavage aspirates, and fecal samples. All samples were thawed on ice for DNA  
148 extraction. For mucosal aspirates and lavage aliquot samples, 250 uL of fluid were taken from  
149 each sample and then DNA was extracted using ZymoBiomics DNA Miniprep Kit (D4300)  
150 according to the manufacturer’s protocol. For mucosal brushes, 750 uL of ZymoBIOMICS Lysis  
151 Solution was mixed with the brushes in their original sterile cryogenic tube and vortexed for 5  
152 minutes to suspend the contents of the brush into solution. The solution was then transferred and  
153 extracted according to the manufacturer’s protocol. Fecal samples stored in Zymo DNA/RNA  
154 shield were thawed, mixed by vortexing, and 750 uL of the fecal plus buffer mix was extracted  
155 according to the manufacturer’s protocol.

#### 156 ***16S Amplicon Library Preparation and Sequencing:***



157 Samples from the first set underwent 16S and ITS amplicon sequencing. We targeted the V4  
158 region of the bacterial 16S rRNA gene using the 515F and 926R primers. For each sample, the  
159 V4 region was amplified using 25 uL polymerase chain reaction (PCR) volumes with the  
160 following reagents: 12.5 uL of 1x AccustartII PCR tough mix (QuantaBio 95142), 9.5 uL of PCR  
161 grade water, 1 uL of 10 mg/mL BSA, 0.5 ng of extracted genomic DNA, and 0.5 uL of 0.2 uM  
162 515F and 926R primers each. The 515F primer contained the Illumina adapter sequence and  
163 barcode. Each sample was amplified using a thermocycler for 30 cycles (94°C for 3 min; 94°C  
164 for 45 sec, 55°C for 30 sec, 72°C for 20 sec; repeat steps 2-4 30 times; 72°C for 10 min). The  
165 resultant amplicons were quantified using the Qubit dsDNA HS Assay Kit (Life technologies  
166 Q32851) according to the manufacturer's protocol and pooled at equimolar concentrations. The  
167 pooled amplicon library was cleaned and concentrated using Agencourt AMPure XP beads  
168 (Beckman-Coulter A63880) according to the manufacturer's protocol. Equimolar PhiX was  
169 added at 10% final volume to the amplicon library and sequenced on the Illumina MiSeq  
170 platform, yielding 300bp paired-end sequences. An average of 41,578 +/- 35,920 ( $\sigma$ ) reads per  
171 sample were obtained for 16S amplicons.

#### 172 ***ITS Amplicon Library Preparation and Sequencing:***

173 Fungi from the first sample set were characterized by targeting the ITS2 region of the 18S rRNA  
174 gene for amplification. We used the ITS9f and ITS4r primers, as described by Looby et al.<sup>22</sup>  
175 PCR was performed in 25 uL volumes, consisting of: 12.5 uL of 1x AccustartII PCR tough mix,  
176 9.5 uL of PCR grade water, 1 uL of 10 mg/mL BSA, 0.5 ng of extracted genomic DNA, and 0.5  
177 uL of 0.3 uM ITS9f and barcoded ITS4r primers each. Amplification was performed with the  
178 following thermocycler settings: 94°C for 5 min, 35 cycles of 95°C for 45 sec, 50°C for 1 min,  
179 72°C for 90 sec, and a final extension step of 72°C for 10 min. Afterwards, we quantified,

180 pooled, and cleaned our ITS2 amplicons using the same methods as our 16S amplicons. Our  
181 ITS2 library was combined with our 16S library and sequenced simultaneously in the reverse  
182 complementary orientation. This yielded an average of 22,252 +/- 17,000 ( $\sigma$ ) ITS reads per  
183 sample.

#### 184 ***Shotgun Library Preparation and Sequencing:***

185 The second sample set was sequenced using shotgun sequencing. Libraries were prepared using  
186 the Illumina DNA prep kit (20018705), using our low-volume protocol.<sup>23</sup> Briefly, a maximum of  
187 5 uL or 50 ng (whichever was reached first) of DNA from each sample was tagmented with 2 uL  
188 of tagmentation master mix for 15 min at 55°C. Afterwards, 1 uL of tagmentation stop buffer  
189 was added to each sample and incubated at 37°C for 15 min. The samples were washed with the  
190 provided buffer according to the manufacturer's protocol, then PCR was performed with 12.5 uL  
191 reaction volumes with the following reagents: 6.25 uL of KAPA HiFi HotStart ReadyMix  
192 (Roche Life Science KK2602), 2.75 uL of PCR grade water, 1.25 uL of 1 uM i5 and i7 index  
193 adaptors each, and 0.5 uL of 10 uM forward and reverse KAPA HiFi polymerase primers each.  
194 PCR amplification was done with the settings: 72°C for 3 min, 98°C for 3 min, 12 cycles of  
195 98°C for 45 sec, 62°C for 30 sec, 72°C for 2 min, and a final extension step of 72°C for 1 min.  
196 Samples were pooled and size selection was performed per the manufacturer's protocol.  
197 Libraries were packaged on dry ice and shipped overnight to Novogene Corporation Inc.  
198 (Sacramento, CA) to be sequenced using Illumina's Hiseq 4000 for 150 bp paired-end  
199 sequencing. An average of 1,267,359 +/- 690,384 ( $\sigma$ ) reads per sample were obtained.

#### 200 ***Taxonomic Assignment of Sequencing Data:***

201 For first sample set, 16S and ITS amplicon sequences were processed using Qiime2-2019.1.<sup>24</sup>  
202 Demultiplexing was performed using the 'q2-demux' function with the 'emp-paired' preset.

203 Sequencing reads were quality filtered, had chimeric sequences, PhiX, and singletons removed,  
204 and were clustered into amplicon sequence variants (ASVs) using the ‘q2-dada2’ function with  
205 the default parameters plus `trunc_len_f = 280`, `trunc_len_r = 220`, `trim_left_f = 5`, and `trim_left_r`  
206 `= 5`.<sup>25</sup> This yielded 147 samples with an average of 30,051 +/- 24,768 ( $\sigma$ ) high quality reads per  
207 sample for 16S amplicons (Supplemental Table 2), and 104 samples with an average of 3,517 +/-  
208 9,154 ( $\sigma$ ) high quality reads for ITS amplicons (Supplemental Table 3). Taxonomic assignment  
209 of 16S and ITS reads was done using the ‘classify-sklearn’ function with default parameters. The  
210 databases used for classification were the Greengenes database (Version 13.8) for 16S data, and  
211 the UNITE database (Version 8.0) for ITS data.<sup>26,27</sup>

212 For second sample set shotgun data, we first removed sequencing adapters using the ‘bbduk.sh’  
213 script from BBDuk v38.79 with the default parameters.<sup>28</sup> Next, we demultiplexed our samples  
214 using ‘demuxbyname.sh’ script from BBDuk using the default parameters. After demultiplexing,  
215 sequences were quality filtered using PRINSEQ++ v1.2 with the parameters `trim_left = 5`,  
216 `trim_right = 5`, `min_len = 100`, `trim_qual_right = 28`, and `min_qual_mean = 25`.<sup>29</sup> This yielded an  
217 average of 1,209,001 +/- 643,544 ( $\sigma$ ) high quality reads. Removal of human-derived reads was  
218 performed with Bowtie2 v2.3.5.1 on default settings by removing reads which aligned to the  
219 reference human genome, hg38.<sup>30</sup> This final number of samples was 238, with an average of  
220 1,102,247 +/- 643,325 ( $\sigma$ ) high quality, non-human reads per sample (Supplemental Table 4).  
221 Lastly, we used IGGSearch v1.0 on the ‘lenient’ preset (`--min-reads-gene=1 --min-perc-`  
222 `genes=15 --min-sp-quality=25`) to characterize the taxonomy of our quality-filtered sequences.<sup>31</sup>

### 223 ***Taxonomic Analysis:***

224 Data analysis was performed using R v3.6.3. For all sequencing runs, a synthetic microbial  
225 community DNA standard (ZymoBIOMICS D6305) was included as a control. When necessary,

226 the first step in our compositional analysis was filtering taxa, from all samples, that contaminated  
227 the community standard control. Next, unassigned and mitochondrial reads were removed from  
228 our samples. 16S and ITS read counts were permutationally rarefied to 3,000 and 1,000 reads,  
229 respectively, for normalization purposes using the 'rrarefy.perm' function from the EcolUtils  
230 package v0.1. Shotgun data remained unrarefied. The alpha diversities for both amplicon and  
231 shotgun data were obtained using the 'diversity' and 'specnumber' functions from the Vegan  
232 v2.5-6 package, using the default parameters. Linear-mixed effect models (LME) were used for  
233 significance testing among alpha diversities to account for random effects, such as plate batching  
234 effects, and multiple measurements per individual using the nlme package, v3.1-148.  
235 For all datasets, beta diversities were obtained using the 'adonis' function in Vegan to generate  
236 Bray-Curtis distance matrices and perform PERMANOVA significance testing from  
237 compositional data. PERMANOVA design and results can be found in Supplemental Tables 5-7  
238 and Supplemental Tables 10-13. Significance was determined at  $p < 0.05$  for both  
239 PERMANOVA and LME. Beta diversity was visualized using non-metric multidimensional  
240 scaling (NMDS) ordination obtained from the 'metaMDS' function in Vegan.

#### 241 ***Differential Abundance Testing:***

242 Our primary focus with the first sample set was to compare the microbial compositions of  
243 different sample types within the same individual. Therefore, we used ANCOM v2.1 in R to test  
244 for differentially abundant microbes since it can account for multiple variables and random  
245 effects.<sup>32</sup> We used ANCOM with 'sample type' as our variable of interest (mucosal brushes vs.  
246 mucosal aspirates vs. colonoscopy lavage aspirates) and the individual of origin as a random  
247 effect. Other parameters included 'p\_adjust = FDR' to control for the false discovery rate, and  
248 significance was determined at  $< 0.05$ .

249 For shotgun data, our primary focus was to compare the microbial composition of different  
250 subject types (Polyp-free vs. TA-bearing vs. SP-bearing). We used a univariate Kruskal-Wallis  
251 test with independent hypotheses weighting (IHW). IHW increases power while controlling the  
252 false discovery weight by utilizing covariate data that are independent of the null hypothesis.<sup>33</sup>  
253 Before testing, we excluded samples with ‘Unknown/Other’ subject types, and filtered taxa that  
254 were not present in at least 20% of samples. We also eliminated repeated measurements by  
255 averaging the microbial relative abundances of left and right mucosal aspirates from the same  
256 individual. Kruskal-Wallis tests were performed for each taxon with the subject type as the  
257 variable. The IHW v1.14.0 package was used to correct p-values for the false discovery rate,  
258 using the sum of read counts per taxon across all samples as our covariate. FDR-adjusted p-  
259 values < 0.05 were considered significant. When visualizing relative abundances using a log<sub>10</sub>  
260 scale, a pseudo-count of 0.0001 was added to prevent the removal of samples containing zeroes.

#### 261 ***Random Forests:***

262 Random Forests (RF) were performed on shotgun-sequenced mucosal aspirates to determine if  
263 the subject type of a sample could be predicted based on microbial composition. To do this, we  
264 used the rfPermute v1.9.3 package in R. We began by filtering taxa which were not present in at  
265 least 20% of mucosal aspirate samples. Two-thirds of the 156 shotgun mucosal aspirates were  
266 used for training the RF classifiers, while the remaining one-third was used for testing our RF  
267 models. RfPermute parameters were set to importance = TRUE, nrep = 100, ntree = 501, and  
268 mtry = 8. Afterwards, we generated receiver-operator curves (ROC) using the ‘roc’ function with  
269 default settings (pROC v1.18.0 package). Variables of importance were visualized with the  
270 ‘VarImpPlot’ function in the rfPermute package.

#### 271 ***Pathway Enrichment Analysis:***

272 Pathway enrichment analysis was done using unassembled shotgun reads with HUMAnN  
273 v3.0.1.<sup>34</sup> The program was ran using the default parameters and the ChocoPhlAn v296 and  
274 UniRef90 v201901b databases were used for alignment. The ‘humann\_renorm\_table’ and  
275 ‘humann\_join\_tables’ functions were used to create a pathway abundance matrix of normalized  
276 counts in copies per million. Significantly enriched pathways between subject types were  
277 determined with a Kruskal-Wallis test using IHW. The false discovery rate was corrected for  
278 using the total sum of normalized counts per pathway as our covariate. Significance was  
279 determined at FDR < 0.05.

### 280 ***Functional Metagenomic Analysis:***

281 Analysis of individual microbial genes was performed by cross-assembling reads into contiguous  
282 sequences using MEGAHIT v1.1.1.<sup>35</sup> Contigs smaller than 2,500 bp were discarded and the  
283 remainder had open reading frames (ORFs) identified by Prodigal v2.6.3.<sup>36</sup> The resulting ORFs  
284 were functionally annotated using eggNOG mapper v2.0, using the eggNOG v5.0 database.<sup>37</sup>  
285 Individual samples were aligned to annotated ORFs using Bowtie2 v2.3 to obtain per-sample  
286 ORF abundances. Per sample ORF abundances were compiled into a single ORF abundance  
287 table using the ‘pileup.sh’ script from BBMap. ORF counts were normalized to reads per  
288 kilobase per genome equivalent using MicrobeCensus v1.1.1 on default settings.<sup>38</sup> Principal  
289 coordinate analysis was performed using the ‘cmdscale’ function from Vegan to visualize the  
290 functional metagenome composition among sample and subject types. PERMANOVA and  
291 differential abundance testing were performed in the same manner as with taxonomy.

### 292 **Results:**

293 ***Microbiomes of Mucosal and Lavage Samples are similar to each other but different from***  
294 ***those in Feces:***

295 To determine whether microbiome composition varied between sample types, we  
296 sequenced DNA from mucosal brushes, mucosal aspirates, and lavage aspirates from a subset of  
297 38 individuals using 16S amplicon sequencing (Supplemental Table 2). We observed no  
298 significant differences in Shannon diversity or richness across mucosal brushes, mucosal  
299 aspirates, and lavage aliquots (Linear mixed effects model (LME):  $p > 0.05$ , Figure 2A).  
300 PERMANOVA analysis of Bray-Curtis dissimilarities revealed that the individual explained the  
301 greatest amount of variation in microbiome composition ( $R^2 = 0.56$ ,  $p = 0.001$ ; Supplemental  
302 Table 5). This analysis found no significant differences in the microbiomes associated with  
303 mucosal brushes, mucosal aspirates, and lavage aliquots from within the same individual ( $R^2 =$   
304  $0.12$ ,  $p = 0.49$ ; Supplemental Table 5). The lack of significance was consistent with no  
305 discernable clusters based on sample type (Figure 2B). The abundances of only three ASV's  
306 significantly differed across the three sampling methods – one from the *Gemellaceae* family and  
307 two *Streptococcus spp.* Abundances of these ASVs were higher in mucosal aspirates compared  
308 to mucosal brushes (ANCOM2: FDR  $< 0.05$ ; Supplemental Figure 1).

309 ITS2 sequencing was also performed on the same subset of samples to investigate the  
310 effect of sampling method on the fungal microbiome (Supplemental Table 3). We observed no  
311 differences in Shannon diversity or richness across mucosal brushes, mucosal aspirates, and  
312 lavage aliquots (LME:  $p > 0.05$ , Figure 2C). Beta-diversity ordination by sample type  
313 demonstrated no discernable clustering (Figure 2D). Like 16S amplicon data, PERMANOVA  
314 analysis of Bray-Curtis dissimilarities showed that the individual explained the greatest amount  
315 of variation in fungal community composition ( $R^2 = 0.28$ ,  $p < 0.001$ ), with no significant  
316 associations between fungal community composition and our three sampling methods ( $R^2 = 0.38$ ,  
317  $p = 0.123$ ; Supplemental Table 6).

318           Following the collection of fecal samples, we performed shotgun sequencing on a second  
319 subset of samples, representing 117 individuals (Supplemental Table 4). Mucosal brushes were  
320 excluded from the second sample set because a pilot shotgun sequencing run revealed these  
321 samples contained a large percentage of human-derived reads (Supplemental Figure 2). Based on  
322 estimates of Shannon diversity and species richness, the microbiomes in fecal samples were  
323 significantly more diverse than those in the mucosal aspirates (LME:  $p = 0.007$  and  $p = 0.002$ ,  
324 respectively) and marginally more diverse than those in lavage aliquots (LME:  $p = 0.053$  and  $p =$   
325  $0.047$ , respectively; Figure 2E). Visualization of sample beta-diversities revealed a cluster of  
326 fecal samples that partially overlapped with mucosal and lavage aspirates (Figure 2F).  
327 PERMANOVA showed that the individual explained the greatest amount of variation in  
328 microbiome composition ( $R^2 = 0.75$ ,  $p < 0.001$ ; Supplemental Table 7). In comparison, sampling  
329 method explained 14% of variation in the microbiome (PERMANOVA:  $p = 0.001$ ). Fecal  
330 samples had a mean relative abundance of 63% for Firmicutes, 27% for Bacteroides, 3.5% for  
331 Actinobacteria, and 4.5% for Proteobacteria. Mucosal aspirates and lavage aliquots were more  
332 similar and had a mean relative abundance of 73% and 75% for Firmicutes, 15% and 11% for  
333 Bacteroides, 4.7% and 5.2% for Actinobacteria, and 4.0% and 6.6% for Proteobacteria,  
334 respectively (Supplemental Figure 3). Differential abundance analysis revealed 44 OTUs whose  
335 abundances significantly differed between fecal samples and mucosal aspirates (ANCOM2: FDR  
336  $< 0.05$ ; Supplemental Table 8). Six OTUs were differentially abundant between fecal samples  
337 and lavage aliquots (Supplemental Table 9), and no OTUs were significantly different between  
338 mucosal aspirates and lavage aliquots (ANCOM2; FDR  $> 0.05$ ).

339 ***The Microbiomes of Polyps and Opposite Wall Healthy Tissue are similar within Individuals:***



340 To identify potential polyp-specific microbial biomarkers, 14 mucosal brush samples  
341 from 6 individuals were collected from polyps and opposite wall healthy tissue and sequenced as  
342 part of the first sample set (Figure 3A). Based on 16S sequencing, we observed no significant  
343 differences in Shannon diversity or richness between polyp and opposite wall healthy tissue from  
344 within the same individual (Figure 3B). Similarly, there were no significant differences in beta-  
345 diversity across polyp and opposite wall healthy tissue pairs (PERMANOVA:  $R^2 = 0.19$ ,  $p =$   
346  $0.53$ ; Figure 3C; Supplemental Table 10). We were unable to identify any differentially abundant  
347 microbes between polyp and opposite wall tissue brushes. Microbiomes were mostly  
348 individualistic, with subject origin explaining 52% of the variance in microbiome composition  
349 (PERMANOVA:  $p = 0.004$ ; Figure 3D; Supplemental Table 10). We detected significant  
350 associations between microbiome composition and colon side (right/proximal versus left/distal),  
351 representing 16% of the observed variance (PERMANOVA:  $p = 0.005$ ; Supplemental Table 10).  
352 Significant associations within the microbiome were observed when both polyp and opposite  
353 wall tissue pairs were categorized by subject type, explaining approximately 10% of variance  
354 (PERMANOVA:  $p = 0.03$ ; Supplemental Table 10).

355 ***Tubular Adenoma-bearing, Serrated Polyp-bearing, and Healthy Individuals have distinct***  
356 ***Microbiomes:***

357 We next reanalyzed all samples from the first and second sample sets to examine whether  
358 the subject type of a sample (polyp-free, TA-bearing, or SP-bearing) was significantly associated  
359 with microbial diversity and composition. In both 16S and shotgun data, we observed no  
360 significant differences between subject types based on Shannon diversity or richness estimates  
361 (LME:  $p > 0.05$ ; Supplemental Figure 4). In ITS data, we observed significantly increased  
362 Shannon diversity, but not richness, in samples from polyp-free individuals when compared to

363 those from TA-bearing individuals (LME:  $p = 0.03$ ; Supplemental Figure 4). Beta diversity  
364 analysis of 16S and ITS data from the first sample set demonstrated that subject type explained  
365 5% and 2% of the variance associated with the microbiome, respectively (16S PERMANOVA:  $p$   
366  $= 0.001$ ; Supplemental Table 5 and ITS PERMANOVA:  $p = 0.11$ ; Supplemental Table 6). A  
367 similar result was observed in the second sample set. We found significant associations between  
368 the microbiome and subject type, explaining 2% of the variance observed (PERMANOVA:  $p =$   
369  $0.001$ ; Supplemental Table 7). This association between microbiome composition and subject  
370 type was not observed when testing lavage aliquots (PERMANOVA:  $p = 0.47$ ; Supplemental  
371 Table 11) or fecal samples (PERMANOVA:  $p = 0.10$ ; Supplement table 12) alone. Taxonomic  
372 visualization suggested that TA-bearing mucosal aspirates were distinct compared to polyp-free  
373 and SP-bearing mucosal aspirates (Figure 4A).

374 We next performed an in-depth investigation of each subject type's microbiome using  
375 second sample set mucosal aspirates, due to their larger comparable sample size. Differential  
376 abundance analysis demonstrated that six microbes were significantly different in at least one  
377 subject type comparison (Figure 4B). *Eggerthella lenta* was the most significantly different  
378 taxon, and it was depleted in SP-bearing samples when compared to polyp-free ( $FDR = 3 \times 10^{-3}$ )  
379 and TA-bearing ( $FDR = 9 \times 10^{-3}$ ) samples. *Bifidobacterium* sp. was also depleted in SP-bearing  
380 samples but the difference was only significant when compared to TA-bearing samples ( $FDR =$   
381  $0.01$ ). Conversely, two species of *Lachnospiraceae* were enriched in SP-bearing samples when  
382 compared to polyp-free (*Lachnospiraceae* sp.  $FDR = 0.04$ ) and TA-bearing samples  
383 (*Lachnospiraceae* HGM12344  $FDR = 0.02$ ). *Clostridium scindens* and *Sellimonas* sp. were both  
384 enriched in TA-bearing mucosal aspirates when compared SP-bearing aspirates ( $FDR = 8 \times 10^{-3}$

385 for *C. scindens*, FDR =  $4 \times 10^{-3}$  for *Sellimonas* sp.). Supplemental Figure 5 suggest that *E. lenta*  
386 was also depleted in 16S mucosal aspirates, but the result was not statistically significant.

387 We next examined whether microbial composition could predict the subject type of  
388 mucosal aspirates. Random forest (RF) was able to accurately classify mucosal aspirates from  
389 each pairwise subject type comparison, producing area under curve (AUC) values of at least 85%  
390 for each comparison (Figure 4C). The microbes most important for determining the classification  
391 of polyp-free versus TA-bearing mucosal aspirates were *Ruthenibacterium* sp., *Ruminococcus*  
392 *gnavus*, *Ruminococcus obeum*, and the previously observed *Bifidobacterium* sp. and *C. scindens*  
393 (Figure 4D). For the polyp-free versus SP-bearing RF classification, *Dorea longicatena*, *Blautia*  
394 sp., *Eubacterium* sp., and *Bacteroides fragilis* were the most important variables (Figure 4E).  
395 Lastly, *Lachnospiraceae* HGM12344, *Bifidobacterium* sp., *Lachnospiraceae* sp., and *E. lenta*  
396 were the top microbes of importance for the SP-bearing versus TA-bearing RF classification  
397 (Figure 4F). Supplemental Figure 6 displays the relative abundances of the top variables of  
398 importance for all RF comparisons. These data suggest each subject type has a distinct microbial  
399 composition which can be used to predict the origin of mucosal aspirates.

#### 400 ***Microbiome Functional Potential is distinct across Sampling Methods and Subject Types:***

401 The functional characteristics of our shotgun metagenomes were next explored. Pathway  
402 analysis was performed, which resulted in the discovery of 507 metabolic pathways  
403 (Supplemental Figure 7). Of those pathways, only the 1,5-anhydrofructose degradation pathway  
404 was significantly more abundant in TA-bearing mucosal aspirates when compared to polyp-free  
405 ones. (FDR = 0.03, Figure 5A). Subsequently, we analyzed individually annotated microbial  
406 genes. Principal coordinate analysis produced a result similar to our taxonomic ordination, with  
407 fecal samples clustering together and no obvious subject type clustering (Figure 5B). This was

408 supported by PERMANOVA, which confirmed an association between functional metagenome  
409 and sampling method, explaining 10.9% of the observed variance (PERMANOVA:  $p = 0.001$ ;  
410 Supplemental Table 13). By comparison, the individual of origin explained approximately 75%  
411 of the observed variance in the functional microbiome (PERMANOVA:  $p = 0.001$ ; Supplemental  
412 Table 13) and subject type explained 1.6% of the observed variance (PERMANOVA:  $p = 0.001$ ;  
413 Supplemental Table 13).

414 We concluded our analysis by examining the differentially abundant genes among subject  
415 types using mucosal aspirates. There were 282 differentially abundant genes between polyp-free  
416 and TA-bearing mucosal aspirates (Figure 5C). Of those genes, 126 had a positive  $\log_2$  fold  
417 change (more abundant in TA-bearing), and 156 had a negative  $\log_2$  fold change (more abundant  
418 in polyp-free). Figure 5F displays the most resolved taxonomic level for the top ten taxa with the  
419 most differentially abundant genes. For polyp-free and TA-bearing samples, the *Bacteroidaceae*  
420 family contained 64 of the 282 differentially abundant genes. Comparatively, 478 differentially  
421 abundant genes were present between polyp-free and SP-bearing mucosal aspirates (Figure 5D).  
422 These genes were mostly more abundant in polyp-free samples, with 330 genes having a  
423 negative  $\log_2$  fold change and 148 having positive  $\log_2$  fold change. *Coriobacteriia*, the class to  
424 which *E. lenta* belongs, was responsible for 188 of the 478 differentially abundant genes (Figure  
425 5G). A similar result was observed when comparing SP-bearing to TA-bearing samples, as of the  
426 754 differentially abundant genes, 226 belonged to *Coriobacteriia* (Figure 5E and 5H). A  
427 complete list of all the differentially abundant genes, their functions, and taxonomy can be found  
428 in the supplement (Supplemental File 1).

## 429 **Discussion:**

### 430 *Sampling Method and Microbiome Characterization:*

431 In this study we used direct and indirect methods to sample the colon and characterize the  
432 microbiomes of polyp-free and colorectal polyp-bearing individuals. Using amplicon  
433 sequencing, we found that microbiomes of mucosal brushes and mucosal aspirates did not  
434 significantly differ in diversity or composition. In contrast, the microbiomes of fecal samples  
435 were significantly more diverse and compositionally distinct when compared to those from  
436 mucosal aspirates.

437 Due to their ease of collection, fecal samples are frequently used to study the human  
438 microbiome in the context of CRC. However, fecal samples poorly represent the microbiota  
439 adherent to the colon mucosa, and instead capture those found in the intestinal lumen.<sup>20,21</sup> Their  
440 increased diversity and paucity of mucosa-associated microbes suggests that fecal samples are  
441 not ideal for discovering novel CRC biomarkers. This is especially true for premalignant polyps,  
442 which have less pronounced signatures of microbial dysbiosis when compared to carcinomas.  
443 This is supported by Peters *et al.*, who found more pronounced compositional changes in the  
444 microbiomes of fecal samples from advanced conventional adenomas when compared to those  
445 from non-advanced adenomas.<sup>17</sup> The decreased sensitivity of fecal samples to detect CRC-  
446 associated microbes is also highlighted by their results demonstrating significant associations  
447 between the gut microbiome and distal conventional adenoma cases, but not proximal.<sup>17</sup> This is  
448 also likely why Peters *et al.* did not observe substantial differences in the microbial compositions  
449 of HPP, SSP, and healthy samples, as serrated polyps predominantly develop in the proximal  
450 colon.

451 In this study, we reported significant associations between the gut microbiome and  
452 mucosal aspirates obtained from both the proximal and distal colon. We also observed significant  
453 differences when comparing the microbiomes of polyp-free samples to SP-bearing ones using

454 mucosal aspirates. No such differences were seen in fecal samples, but this may be a result of  
455 smaller sample size. Nevertheless, these data suggest that mucosal samples are sensitive enough  
456 to study the microbiome of colorectal polyps found within the proximal colon. These results  
457 contradict a study published by Yoon *et al.*, who did not find significant compositional  
458 differences the in mucosa-associated gut microbiota among polyp-free, TA, SSP, and CRC  
459 bearing individuals.<sup>18</sup> The authors did note, however, that this result was likely driven by the  
460 small sample size of the study, with only 6 samples per group, and 24 samples total.

461         Compared to mucosal brushes, mucosal aspirates had a lower risk of damaging the host  
462 epithelium, provided larger collection volumes for downstream sample processing, and resulted  
463 in a lower proportion of human derived reads during shotgun sequencing. Because of these  
464 advantages, we recommend using mucosal aspirates rather than mucosal brushing for  
465 characterizing the microbiomes of colorectal polyps.

#### 466 ***Hyperlocal Microbiome Comparisons:***

467         Direct sampling of polyp mucosa with brushes revealed no differences in the hyperlocal  
468 microbiome of polyp tissue versus opposite colon wall tissue. One factor which could have  
469 disrupted the potential hyperlocal differences in the gut microbiota is the colonoscopy  
470 preparation and lavage. As part of the preparation, individuals were advised to adhere to a low  
471 fiber, clear liquid diet 24 hours prior to colonoscopy. Dietary fiber is important in maintaining  
472 the longitudinal and lateral organization of the gut microbiota within the colon, as mice on a low  
473 fiber diet show disrupted microbial organization.<sup>20</sup> Changes in diet can rapidly shift the  
474 composition of the gut microbiome, often within 24 hours, in both humans and mice.<sup>7,39,40</sup> A  
475 laxative-based cleansing and colonoscopy rinse was also performed, potentially obscuring the  
476 hyperlocal organization further. Nevertheless, significant compositional differences between the

477 microbiomes of samples taken from the proximal and distal colon were observed, suggesting that  
478 broad microbial organization remained present in the gut after colonoscopy preparation and  
479 lavage. It is important to note that these claims are based on data from 14 samples from 6  
480 individuals, therefore, additional studies with more samples are needed to validate the  
481 reproducibility of our findings.

#### 482 ***Microbiome Signatures of the CRC Carcinogenesis Pathways:***

483 Compositional differences were observed in the gut microbiome across TA-bearing, SP-  
484 bearing, and polyp-free individuals using mucosal sampling. Notably, we demonstrated that the  
485 microbial composition of each subject type was distinct enough to accurately predict the origin  
486 of mucosal aspirates using RF. This is further evidenced by the discovery of 6 and 1,143  
487 differentially abundant taxa and genes among subject types, respectively. These findings suggest  
488 that the gut microbiome functions differently between the adenoma-carcinoma sequence and the  
489 serrated pathway.

490 In the adenoma-carcinoma sequence, the gut microbiome exists in, and potentially  
491 contributes to, an inflammatory environment to promote colorectal carcinogenesis. Data obtained  
492 from mucosal aspirates also support this theory. RF classification identified *Ruminococcus*  
493 *gnavus* and *Bacteroides fragilis* as top variables of importance, both of which were elevated in  
494 TA-bearing mucosal aspirates. *R. gnavus* has been previously associated with CRC and  
495 inflammatory bowel disease.<sup>41</sup> *B. fragilis* produces a metalloprotease that causes oxidative DNA  
496 damage and cleaves the tumor suppressor protein, E-cadherin.<sup>42-44</sup> *C. scindens* was also  
497 significantly elevated in TA-bearing aspirates, and it can metabolize excess primary bile acids  
498 not absorbed by the small intestine into secondary bile acids.<sup>45,46</sup> We did not observe an  
499 increased abundance of *C. scindens* bile acid metabolism genes directly, but high concentrations

500 of secondary bile acids can cause host oxidative stress, nitrosative stress, DNA damage,  
501 apoptosis, and mutations.<sup>47</sup> Secondary bile acids also act as farnesoid X receptor antagonists,  
502 resulting in enhanced *wnt* signaling in the adenoma-carcinoma sequence.<sup>48</sup> High fructose corn  
503 syrup consumption has also been associated with increased CRC risk.<sup>49,50</sup> Here, we observed that  
504 the TA-associated microbiome of mucosal aspirates had an increased abundance of genes that  
505 encode the pathway for degrading 1,5-anhydrofructose, which can be produced from fructose,  
506 glucose, or starch.<sup>51</sup> This pathway was elevated in TA-bearing samples, but 1,5-anhydrofructose  
507 has been shown to promote the growth of the beneficial microbe, *Faecalibacterium prausnitzii*,  
508 and reduce inflammation by inactivating NF- $\kappa$ B.<sup>52,53</sup> *Sellimonas*, which has been found to  
509 negatively correlate with clinical tumor markers, was more also abundant in TA-bearing mucosal  
510 aspirates.<sup>54</sup>

511 Unlike the adenoma-carcinoma sequence, the microbiome in the serrated pathway  
512 remains understudied. *Fusobacterium nucleatum*, which has been implicated in the adenoma-  
513 carcinoma sequence because of its ability to activate *wnt* signaling, has also been described as  
514 having a role in serrated CRC development.<sup>55</sup> *F. nucleatum* abundance is associated with  
515 serrated pathway lesions and features, such as mismatch repair deficiency, MLH1 methylation,  
516 CpG island methylator phenotype, and high microsatellite instability.<sup>14</sup> Here, we did not find  
517 differences in *F. nucleatum* abundances across HPPs, SSPs, TAs, or polyp-free controls. Instead,  
518 we most prominently found that *E. lenta* was depleted in mucosal aspirates from SP-bearing  
519 individuals, a result that spanned 16S and shotgun data.

520 *E. lenta* metabolizes inert plant lignans in the gut into bioactive enterolignans, such as  
521 enterolactone and enterodiol.<sup>56</sup> These enterolignans have anti-proliferative and anti-inflammatory  
522 effects, and help modulate estrogen signaling, lipid metabolism, and bile acid regulation.<sup>57</sup> They



523 have also been associated with reduced cancer risk.<sup>58</sup> Diets rich in plant fiber have been  
524 associated with decreased CRC risk.<sup>6,59</sup> Fiber is fermented by the intestinal microbiota to  
525 produce short chain fatty acids, including acetate, butyrate, and propionate. Butyrate is the  
526 primary energy source for colonocytes and has anti-inflammatory and anti-tumor properties.<sup>60-62</sup>  
527 Butyrate also is involved in the epigenetic expression of genes as a histone deacetylase  
528 inhibitor.<sup>63</sup> In the serrated pathway, the gene SLC5A8, which mediates short chain fatty acid  
529 uptake into colonic epithelial cells, is frequently inhibited via promoter methylation, suggesting  
530 that dietary fiber may be required for proper cellular epigenetic regulation.<sup>64</sup>

531 More evidence of dietary fiber playing a role in the SP-associated microbiome is the  
532 depletion of many carbohydrate active enzymes in our functional metagenomic data. This  
533 includes a 4-amino-4-deoxy-L-arabinose transferase and a glycosyltransferase family 2 from *E.*  
534 *lenta*, *axeA* from *Bifidobacterium*, and *uidA*, *sacC*, and a glycoside hydrolase family 31 from the  
535 *Bacteroidaceae*. Therefore, we hypothesize that low dietary fiber consumption facilitates  
536 aberrant epigenetic modifications within colonocytes to promote serrated polyp development.  
537 Studies which utilize both mucosal sampling methods and dietary information are needed to test  
538 this hypothesis.

### 539 **Conclusion:**

540 The complex and individualistic nature of the human gut microbiome has made it  
541 difficult to mechanistically link the microbiome with colorectal carcinogenesis. By describing  
542 the association between the gut microbiota and serrated polyps, our study provides novel insight  
543 into potential mechanisms for the epigenetic-based serrated pathway of CRC. In addition, our  
544 data underscores the importance of distinguishing between different pathways of colorectal  
545 carcinogenesis when investigating the gut microbiome. Finally, transitioning future microbiome

546 studies to mucosal sampling methods will enable the discovery of previously unassociated  
547 microbes as demonstrated here.

548 **Declarations:**

549 ***Author contributions:***

550 Katrine L. Whiteson and William E. Karnes devised the study design with support from Lauren  
551 DeDecker. Subject recruitment was performed by William E. Karnes and Zachary Lu. Sample  
552 collection was performed by William E. Karnes, Lauren DeDecker, and Zachary Lu with  
553 guidance from Katrine L. Whiteson. Julio Avelar-Barragan, Bretton Coppedge, and Zachary Lu  
554 processed samples for data acquisition. Julio Avelar-Barragan performed the data analysis and  
555 wrote the manuscript with guidance from Katrine L. Whiteson.

556 ***Ethics approval:***

557 This study was approved by the Institutional Review Board (IRB) of the University of  
558 California, Irvine (HS# 2017-3869).

559 ***Funding details:***

560 This study was funded by institutional research grant #IRG-16-187-13 from the American  
561 Cancer Society.

562 ***Disclosure of interest:***

563 The authors declare no competing or conflicts of interest.

564 ***Data availability statement:***

565 All code for data processing and analysis is available on GitHub at:  
566 [https://github.com/Javelarb/ACS\\_polyp\\_study](https://github.com/Javelarb/ACS_polyp_study). Additional data and materials are available upon  
567 reasonable request.

568 ***Data deposition:***

569 Sequencing data is available on the Sequence Read Archive under the BioProject ID,  
570 PRJNA745329.

571 ***Acknowledgements:***

572 We would like to thank Claudia Weihe and Jennifer B.H Martiny for allowing us to borrow  
573 laboratory equipment and giving insightful feedback, Andrew Oliver and Jason A. Rothman for  
574 their bioinformatic expertise, Clark Hendrickson for his assistance with sample preparation, and  
575 Heather Maughan for her helpful edits and suggestions.

576 **Figure and table legends:**

577 ***Figure 1: Study design.***

578 A total of 140 individuals were recruited for this study, including 50 polyp-free individuals, 45  
579 with tubular adenomas, and 33 with serrated polyps (HPP, TSA, or SSP). For the remaining 12  
580 individuals, 11 had unknown pathology and one had an adenocarcinoma. Multiple samples were  
581 taken from each subject during colonoscopy. This included mucosal brushes (Method #1,  
582 orange), mucosal aspirates (Method #2, yellow), and lavage aliquots (Method #3, purple). Fecal  
583 samples (Method #4, brown) were collected from participants four to six weeks post-  
584 colonoscopy. DNA extraction and sequencing produced two sample sets. The first sample set  
585 was produced by sequencing mucosal brushes, mucosal aspirates, and lavage aspirates using 16S  
586 and ITS sequencing. The second sample set was produced by sequencing mucosal aspirates,  
587 lavage aspirates, and fecal samples using whole-genome shotgun sequencing.

588 **Table 1: Study cohort information.** A table describing the sample sizes, sample types, median  
 589 age, median BMI, ethnicity compositions, and sex ratios of each sample set. The first sample set  
 590 was sequenced twice, once using 16S sequencing and once using ITS sequencing.

|                                      | <b>Sample set 1 (16S)</b>                                                  | <b>Sample set 1 (ITS)</b>                                                   | <b>Sample set 2 (Shotgun)</b>                                                |
|--------------------------------------|----------------------------------------------------------------------------|-----------------------------------------------------------------------------|------------------------------------------------------------------------------|
| <b>Number of samples</b>             | 147                                                                        | 104                                                                         | 238                                                                          |
| <b>Sample types</b>                  | Mucosal brushes<br>Mucosal aspirates<br>Lavage aspirates                   | Mucosal brushes<br>Mucosal aspirates<br>Lavage aspirates                    | Mucosal aspirates<br>Lavage aspirates<br>Fecal samples                       |
| <b>Median Age (Years)</b>            | 60                                                                         | 61                                                                          | 65                                                                           |
| <b>Median BMI (kg/m<sup>2</sup>)</b> | 25                                                                         | 24                                                                          | 26                                                                           |
| <b>Ethnicity</b>                     | White: 60%<br>Black: 7%<br>Asian: 21%<br>Hispanic: 8%<br>Other/Unknown: 4% | White: 72%<br>Black: 3%<br>Asian: 12%<br>Hispanic: 11%<br>Other/Unknown: 2% | White: 58%<br>Black: 1%<br>Asian: 16%<br>Hispanic: 11%<br>Other/Unknown: 14% |
| <b>Sex</b>                           | Male: 57%<br>Female: 43%<br>Other/Unknown: 0%                              | Male: 63%<br>Female: 37%<br>Other/Unknown: 0%                               | Male: 48%<br>Female: 39%<br>Other/Unknown: 13%                               |

591

592 **Figure 2: Microbiomes of Mucosal and Lavage Samples are similar to each other but different**  
593 **from those in Feces.**

594 **A, C, and E)** Box plots showing Shannon diversity and richness estimates across mucosal  
595 aspirates (yellow), mucosal brushes (orange), lavage aliquots (purple), and fecal samples  
596 (brown). The first sample set was sequenced using 16S (**A**), and ITS (**C**) sequencing. The second  
597 sample set was sequenced using shotgun sequencing (**E**). The center line within each box defines  
598 the median, boxes define the upper and lower quartiles, and whiskers define 1.5x the  
599 interquartile range. **B, D, and F)** Non-metric multidimensional scaling of Bray-Curtis  
600 dissimilarities produced from 16S (**B**), ITS (**D**), and shotgun (**F**) compositional data. Each point  
601 corresponds to one sample, with multiple samples per individual. The individual of origin is  
602 denoted numerically within each point. The number of samples per sample type and subject  
603 category are annotated parenthetically. Significant comparisons ( $p < 0.05$ ) are denoted by an  
604 asterisk (\*).

605 **Figure 3: The Microbiomes of Polyps and Opposite Wall Healthy Tissue are similar within**  
606 **Individuals.**

607 **A)** An illustration of the sampling strategy used to characterize the microbial community of 16S  
608 mucosal brushes from polyps (red) and opposite wall tissue (green). **B)** Box plots of Shannon  
609 diversity and richness estimates from polyp and opposite wall brushes. The center line within  
610 each box defines the median, boxes define the upper and lower quartiles, and whiskers define  
611 1.5x the interquartile range. **C)** Non-metric multidimensional scaling of Bray-Curtis  
612 dissimilarities of polyp and opposite wall tissue brushes. Each point is one sample, with multiple  
613 samples per individual. The individual of origin is denoted numerically within each point. The  
614 shape of each point denotes the right (proximal) and left (distal) side of the colon. **D)** The  
615 relative abundance of the top ten microbial genera across all samples. Samples are grouped by  
616 each individual and labeled by polyp type, where tubular adenoma = TA, hyperplastic polyp =  
617 HPP, and sessile serrated polyp = SSP.



618 **Figure 4: Tubular Adenoma-bearing, Serrated Polyp-bearing, and Healthy Individuals have**  
619 **distinct Microbiomes.**

620 **A)** Box plots of the top seven most abundant microbial families across all samples from the  
621 second sample set. The number of samples per sampling method and subject type are denoted  
622 parenthetically, with multiple samples per individual. **B)** Box plots showing the relative  
623 abundances of microbes determined to be differentially abundant between each subject type  
624 using shotgun-sequenced mucosal aspirates. Each point refers to a single individual. Significant  
625 comparisons ( $p < 0.05$ ) are denoted by an asterisk (\*). The center line within each box defines  
626 the median, boxes define the upper and lower quartiles, and whiskers define 1.5x the  
627 interquartile range. **C)** A receiver operating characteristic (ROC) curve illustrating the true  
628 positive rate (Sensitivity, y-axis) versus the false positive rate (Specificity, x-axis) produced by  
629 Random Forest classification. The area under the curve (AUC) value for each Random Forest is  
630 displayed with the 90% confidence interval. **D)** The top ten variables of importance for each  
631 pairwise random forest classification. Variables are sorted by their mean decrease in accuracy,  
632 with larger means contributing greater to random forest performance.

633 **Figure 5: Microbiome Functional Potential is distinct across Subject Types.**

634 **A)** A box plot displaying the abundance in reads-per-million of the 1,5-anhydrofructose  
635 degradation pathway in mucosal aspirates. Each point represents a single individual and  
636 significant comparisons are denoted with an asterisk (\*). The center line within each box defines  
637 the median, boxes define the upper and lower quartiles, and whiskers define 1.5x the  
638 interquartile range. **B)** Principal coordinate analysis of per-gene Bray-Curtis dissimilarities  
639 across second sample set mucosal aspirates, lavage aliquots, and fecal samples. Ellipses are  
640 drawn to represent the 95% confidence interval of each sample type's distribution. Points  
641 represent a single sample, with multiple samples per individual. The number of samples per  
642 sampling method and subject type are annotated parenthetically. **C, D, and E)** Volcano plots  
643 illustrating the differential abundances of microbial genes in mucosal aspirate samples. The  
644 horizontal and vertical lines denote the significance threshold of  $p = 0.05$ , and a log2fold change  
645 of zero, respectively. Points are colored to denote the subject type in which the gene was more  
646 abundant, with green referring to genes more abundant in polyp-free samples, red for tubular  
647 adenomas, and blue for serrated polyps. The number of total, negative fold-change, and positive-  
648 fold change genes are displayed within each graph. **F, G, and H)** The number of differentially  
649 abundant genes per taxon for each subject type comparison. Only the top ten taxa with the most  
650 differentially abundant genes are shown.

651 **REFERENCES:**

- 652 1. Sung, Hyuna, Jacques Ferlay, Rebecca L. Siegel, Mathieu Laversanne, Isabelle  
653 Soerjomataram, Ahmedin Jemal, and Freddie Bray. “Global Cancer Statistics 2020:  
654 GLOBOCAN Estimates of Incidence and Mortality Worldwide for 36 Cancers in 185  
655 Countries.” *CA: A Cancer Journal for Clinicians* 71, no. 3 (May 2021): 209–49.  
656 <https://doi.org/10.3322/caac.21660>.
- 657 2. Stoffel, Elena M., Pamela B. Mangu, Stephen B. Gruber, Stanley R. Hamilton, Matthew F.  
658 Kalady, Michelle Wan Yee Lau, Karen H. Lu, Nancy Roach, and Paul J. Limburg.  
659 “Hereditary Colorectal Cancer Syndromes: American Society of Clinical Oncology Clinical  
660 Practice Guideline Endorsement of the Familial Risk–Colorectal Cancer: European Society  
661 for Medical Oncology Clinical Practice Guidelines.” *Journal of Clinical Oncology* 33, no. 2  
662 (January 10, 2015): 209–17. <https://doi.org/10.1200/JCO.2014.58.1322>.
- 663 3. Collins, S.M., E. Denou, E.F. Verdu, and P. Bercik. “The Putative Role of the Intestinal  
664 Microbiota in the Irritable Bowel Syndrome.” *Digestive and Liver Disease* 41, no. 12  
665 (December 2009): 850–53. <https://doi.org/10.1016/j.dld.2009.07.023>.
- 666 4. Verdam, Froukje J., Susana Fuentes, Charlotte de Jonge, Erwin G. Zoetendal, Runi Erbil, Jan  
667 Willem Greve, Wim A. Buurman, Willem M. de Vos, and Sander S. Rensen. “Human  
668 Intestinal Microbiota Composition Is Associated with Local and Systemic Inflammation in  
669 Obesity: Obese Gut Microbiota and Inflammation.” *Obesity* 21, no. 12 (December 2013):  
670 E607–15. <https://doi.org/10.1002/oby.20466>.
- 671 5. Song, Mingyang, Wendy S. Garrett, and Andrew T. Chan. “Nutrients, Foods, and Colorectal  
672 Cancer Prevention.” *Gastroenterology* 148, no. 6 (May 2015): 1244-1260.e16.  
673 <https://doi.org/10.1053/j.gastro.2014.12.035>.

- 674 6. “Diet, Nutrition, Physical Activity, and Colorectal Cancer.” World Cancer Research  
675 Fund/American Institute for Cancer Research. Continuous Update Project Expert Report,  
676 2018. [dietandcancerreport.org](https://www.dietandcancerreport.org).
- 677 7. David, Lawrence A., Corinne F. Maurice, Rachel N. Carmody, David B. Gootenberg, Julie  
678 E. Button, Benjamin E. Wolfe, Alisha V. Ling, et al. “Diet Rapidly and Reproducibly Alters  
679 the Human Gut Microbiome.” *Nature* 505, no. 7484 (January 2014): 559–63.  
680 <https://doi.org/10.1038/nature12820>.
- 681 8. Engen, Phillip A., Stefan J. Green, Robin M. Voigt, Christopher B. Forsyth, and Ali  
682 Keshavarzian. “The Gastrointestinal Microbiome: Alcohol Effects on the Composition of  
683 Intestinal Microbiota.” *Alcohol Research: Current Reviews* 37, no. 2 (2015): 223–36.
- 684 9. Ley, Ruth E. “Obesity and the Human Microbiome:” *Current Opinion in Gastroenterology*  
685 26, no. 1 (January 2010): 5–11. <https://doi.org/10.1097/MOG.0b013e328333d751>.
- 686 10. Mailing, Lucy J., Jacob M. Allen, Thomas W. Buford, Christopher J. Fields, and Jeffrey A.  
687 Woods. “Exercise and the Gut Microbiome: A Review of the Evidence, Potential  
688 Mechanisms, and Implications for Human Health.” *Exercise and Sport Sciences Reviews* 47,  
689 no. 2 (April 2019): 75–85. <https://doi.org/10.1249/JES.000000000000183>.
- 690 11. Nakanishi, Yuki, Maria T. Diaz-Meco, and Jorge Moscat. “Serrated Colorectal Cancer: The  
691 Road Less Travelled?” *Trends in Cancer* 5, no. 11 (November 2019): 742–54.  
692 <https://doi.org/10.1016/j.trecan.2019.09.004>.
- 693 12. Pino, Maria S., and Daniel C. Chung. “The Chromosomal Instability Pathway in Colon  
694 Cancer.” *Gastroenterology* 138, no. 6 (May 2010): 2059–72.  
695 <https://doi.org/10.1053/j.gastro.2009.12.065>.

- 696 13. De Palma, Fatima, Valeria D'Argenio, Jonathan Pol, Guido Kroemer, Maria Maiuri, and  
697 Francesco Salvatore. "The Molecular Hallmarks of the Serrated Pathway in Colorectal  
698 Cancer." *Cancers* 11, no. 7 (July 20, 2019): 1017. <https://doi.org/10.3390/cancers11071017>.
- 699 14. DeDecker, Lauren, Bretton Coppedge, Julio Avelar-Barragan, William Karnes, and Katrine  
700 Whiteson. "Microbiome Distinctions between the CRC Carcinogenic Pathways." *Gut*  
701 *Microbes*, January 15, 2021, 1–12. <https://doi.org/10.1080/19490976.2020.1854641>.
- 702 15. Kahi, Charles J. "Screening Relevance of Sessile Serrated Polyps." *Clinical Endoscopy* 52,  
703 no. 3 (May 31, 2019): 235–38. <https://doi.org/10.5946/ce.2018.112>.
- 704 16. Delker, Don A., Brett M. McGettigan, Priyanka Kanth, Stelian Pop, Deborah W. Neklason,  
705 Mary P. Bronner, Randall W. Burt, and Curt H. Hagedorn. "RNA Sequencing of Sessile  
706 Serrated Colon Polyps Identifies Differentially Expressed Genes and Immunohistochemical  
707 Markers." Edited by Frank T. Kolligs. *PLoS ONE* 9, no. 2 (February 12, 2014): e88367.  
708 <https://doi.org/10.1371/journal.pone.0088367>.
- 709 17. Peters, Brandilyn A., Christine Dominianni, Jean A. Shapiro, Timothy R. Church, Jing Wu,  
710 George Miller, Elizabeth Yuen, et al. "The Gut Microbiota in Conventional and Serrated  
711 Precursors of Colorectal Cancer." *Microbiome* 4, no. 1 (December 2016): 69.  
712 <https://doi.org/10.1186/s40168-016-0218-6>.
- 713 18. Yoon, Hyuk, Nayoung Kim, Ji Hyun Park, Yong Sung Kim, Jongchan Lee, Hyoung Woo  
714 Kim, Yoon Jin Choi, et al. "Comparisons of Gut Microbiota Among Healthy Control,  
715 Patients With Conventional Adenoma, Sessile Serrated Adenoma, and Colorectal Cancer."  
716 *Journal of Cancer Prevention* 22, no. 2 (June 30, 2017): 108–14.  
717 <https://doi.org/10.15430/JCP.2017.22.2.108>.

- 718 19. Rezasoltani, Sama, Hamid Asadzadeh Aghdaei, Hossein Dabiri, Abbas Akhavan Sepahi,  
719 Mohammad Hossein Modarressi, and Ehsan Nazemalhosseini Mojarad. “The Association  
720 between Fecal Microbiota and Different Types of Colorectal Polyp as Precursors of  
721 Colorectal Cancer.” *Microbial Pathogenesis* 124 (November 2018): 244–49.  
722 <https://doi.org/10.1016/j.micpath.2018.08.035>.
- 723 20. Riva, Alessandra, Orest Kuzyk, Erica Forsberg, Gary Siuzdak, Carina Pfann, Craig Herbold,  
724 Holger Daims, Alexander Loy, Benedikt Warth, and David Berry. “A Fiber-Deprived Diet  
725 Disturbs the Fine-Scale Spatial Architecture of the Murine Colon Microbiome.” *Nature*  
726 *Communications* 10, no. 1 (December 2019): 4366. [https://doi.org/10.1038/s41467-019-](https://doi.org/10.1038/s41467-019-12413-0)  
727 [12413-0](https://doi.org/10.1038/s41467-019-12413-0).
- 728 21. Chen, Weiguang, Fanlong Liu, Zongxin Ling, Xiaojuan Tong, and Charlie Xiang. “Human  
729 Intestinal Lumen and Mucosa-Associated Microbiota in Patients with Colorectal Cancer.”  
730 Edited by Antonio Moschetta. *PLoS ONE* 7, no. 6 (June 28, 2012): e39743.  
731 <https://doi.org/10.1371/journal.pone.0039743>.
- 732 22. Looby, Caitlin I., Mia R. Maltz, and Kathleen K. Treseder. “Belowground Responses to  
733 Elevation in a Changing Cloud Forest.” *Ecology and Evolution* 6, no. 7 (April 2016): 1996–  
734 2009. <https://doi.org/10.1002/ece3.2025>.
- 735 23. Weihe, Claudia, and Avelar-Barragan, Julio. “Next Generation Shotgun Library Preparation  
736 for Illumina Sequencing - Low Volume V1.” Accessed January 3, 2022.  
737 <https://doi.org/10.17504/protocols.io.bvv8n69w>.
- 738 24. Bolyen, Evan, Jai Ram Rideout, Matthew R. Dillon, Nicholas A. Bokulich, Christian C.  
739 Abnet, Gabriel A. Al-Ghalith, Harriet Alexander, et al. “Reproducible, Interactive, Scalable

- 740 and Extensible Microbiome Data Science Using QIIME 2.” *Nature Biotechnology* 37, no. 8  
741 (August 2019): 852–57. <https://doi.org/10.1038/s41587-019-0209-9>.
- 742 25. Callahan, Benjamin J, Paul J McMurdie, Michael J Rosen, Andrew W Han, Amy Jo A  
743 Johnson, and Susan P Holmes. “DADA2: High-Resolution Sample Inference from Illumina  
744 Amplicon Data.” *Nature Methods* 13, no. 7 (July 2016): 581–83.  
745 <https://doi.org/10.1038/nmeth.3869>.
- 746 26. McDonald, Daniel, Morgan N Price, Julia Goodrich, Eric P Nawrocki, Todd Z DeSantis,  
747 Alexander Probst, Gary L Andersen, Rob Knight, and Philip Hugenholtz. “An Improved  
748 Greengenes Taxonomy with Explicit Ranks for Ecological and Evolutionary Analyses of  
749 Bacteria and Archaea.” *The ISME Journal* 6, no. 3 (March 2012): 610–18.  
750 <https://doi.org/10.1038/ismej.2011.139>.
- 751 27. Nilsson, Rolf Henrik, Karl-Henrik Larsson, Andy F S Taylor, Johan Bengtsson-Palme,  
752 Thomas S Jeppesen, Dmitry Schigel, Peter Kennedy, et al. “The UNITE Database for  
753 Molecular Identification of Fungi: Handling Dark Taxa and Parallel Taxonomic  
754 Classifications.” *Nucleic Acids Research* 47, no. D1 (January 8, 2019): D259–64.  
755 <https://doi.org/10.1093/nar/gky1022>.
- 756 28. Bushnell, Brian. “BBMap: A Fast, Accurate, Splice-Aware Aligner.” Lawrence Berkeley  
757 National Lab.(LBNL), 2014.
- 758 29. Cantu, Vito Adrian, Jeffrey Sadural, and Robert Edwards. “PRINSEQ++, a Multi-Threaded  
759 Tool for Fast and Efficient Quality Control and Preprocessing of Sequencing Datasets.”  
760 Preprint. PeerJ Preprints, February 27, 2019. <https://doi.org/10.7287/peerj.preprints.27553v1>.
- 761 30. Langmead, Ben, and Steven L Salzberg. “Fast Gapped-Read Alignment with Bowtie 2.”  
762 *Nature Methods* 9, no. 4 (April 2012): 357–59. <https://doi.org/10.1038/nmeth.1923>.

- 763 31. Nayfach, Stephen, Zhou Jason Shi, Rekha Seshadri, Katherine S. Pollard, and Nikos C.  
764 Kyrpides. “New Insights from Uncultivated Genomes of the Global Human Gut  
765 Microbiome.” *Nature* 568, no. 7753 (April 2019): 505–10. [https://doi.org/10.1038/s41586-](https://doi.org/10.1038/s41586-019-1058-x)  
766 [019-1058-x](https://doi.org/10.1038/s41586-019-1058-x).
- 767 32. Mandal, Siddhartha, Will Van Treuren, Richard A. White, Merete Eggesbø, Rob Knight, and  
768 Shyamal D. Peddada. “Analysis of Composition of Microbiomes: A Novel Method for  
769 Studying Microbial Composition.” *Microbial Ecology in Health & Disease* 26, no. 0 (May  
770 29, 2015). <https://doi.org/10.3402/mehd.v26.27663>.
- 771 33. Ignatiadis, Nikolaos, Bernd Klaus, Judith B Zaugg, and Wolfgang Huber. “Data-Driven  
772 Hypothesis Weighting Increases Detection Power in Genome-Scale Multiple Testing.”  
773 *Nature Methods* 13, no. 7 (July 2016): 577–80. <https://doi.org/10.1038/nmeth.3885>.
- 774 34. Beghini, Francesco, Lauren J McIver, Aitor Blanco-Míguez, Leonard Dubois, Francesco  
775 Asnicar, Sagun Maharjan, Ana Mailyan, et al. “Integrating Taxonomic, Functional, and  
776 Strain-Level Profiling of Diverse Microbial Communities with BioBakery 3.” *ELife* 10 (May  
777 4, 2021): e65088. <https://doi.org/10.7554/eLife.65088>.
- 778 35. Li, Dinghua, Ruibang Luo, Chi-Man Liu, Chi-Ming Leung, Hing-Fung Ting, Kunihiro  
779 Sadakane, Hiroshi Yamashita, and Tak-Wah Lam. “MEGAHIT v1.0: A Fast and Scalable  
780 Metagenome Assembler Driven by Advanced Methodologies and Community Practices.”  
781 *Methods* 102 (June 2016): 3–11. <https://doi.org/10.1016/j.ymeth.2016.02.020>.
- 782 36. Hyatt, Doug, Gwo-Liang Chen, Philip F LoCascio, Miriam L Land, Frank W Larimer, and  
783 Loren J Hauser. “Prodigal: Prokaryotic Gene Recognition and Translation Initiation Site  
784 Identification.” *BMC Bioinformatics* 11, no. 1 (December 2010): 119.  
785 <https://doi.org/10.1186/1471-2105-11-119>.



- 786 37. Huerta-Cepas, Jaime, Damian Szklarczyk, Davide Heller, Ana Hernández-Plaza, Sofia K  
787 Forslund, Helen Cook, Daniel R Mende, et al. “EggNOG 5.0: A Hierarchical, Functionally  
788 and Phylogenetically Annotated Orthology Resource Based on 5090 Organisms and 2502  
789 Viruses.” *Nucleic Acids Research* 47, no. D1 (January 8, 2019): D309–14.  
790 <https://doi.org/10.1093/nar/gky1085>.
- 791 38. Nayfach, Stephen, and Katherine S Pollard. “Average Genome Size Estimation Improves  
792 Comparative Metagenomics and Sheds Light on the Functional Ecology of the Human  
793 Microbiome.” *Genome Biology* 16, no. 1 (December 2015): 51.  
794 <https://doi.org/10.1186/s13059-015-0611-7>.
- 795 39. Wu, G. D., J. Chen, C. Hoffmann, K. Bittinger, Y.-Y. Chen, S. A. Keilbaugh, M. Bewtra, et  
796 al. “Linking Long-Term Dietary Patterns with Gut Microbial Enterotypes.” *Science* 334, no.  
797 6052 (October 7, 2011): 105–8. <https://doi.org/10.1126/science.1208344>.
- 798 40. Turnbaugh, P. J., V. K. Ridaura, J. J. Faith, F. E. Rey, R. Knight, and J. I. Gordon. “The  
799 Effect of Diet on the Human Gut Microbiome: A Metagenomic Analysis in Humanized  
800 Gnotobiotic Mice.” *Science Translational Medicine* 1, no. 6 (November 11, 2009): 6ra14-  
801 6ra14. <https://doi.org/10.1126/scitranslmed.3000322>.
- 802 41. Hall, Andrew Brantley, Moran Yassour, Jenny Sauk, Ashley Garner, Xiaofang Jiang,  
803 Timothy Arthur, Georgia K. Lagoudas, et al. “A Novel Ruminococcus Gnavus Clade  
804 Enriched in Inflammatory Bowel Disease Patients.” *Genome Medicine* 9, no. 1 (November  
805 28, 2017): 103. <https://doi.org/10.1186/s13073-017-0490-5>.
- 806 42. Haghi, Fakhri, Elshan Goli, Bahman Mirzaei, and Habib Zeighami. “The Association  
807 between Fecal Enterotoxigenic *B. Fragilis* with Colorectal Cancer.” *BMC Cancer* 19, no. 1  
808 (December 2019): 879. <https://doi.org/10.1186/s12885-019-6115-1>.

- 809 43. Ulger Toprak, N., A. Yagci, B.M. Gulluoglu, M.L. Akin, P. Demirkalem, T. Celenk, and G.  
810 Soyletir. “A Possible Role of Bacteroides Fragilis Enterotoxin in the Aetiology of Colorectal  
811 Cancer.” *Clinical Microbiology and Infection* 12, no. 8 (August 2006): 782–86.  
812 <https://doi.org/10.1111/j.1469-0691.2006.01494.x>.
- 813 44. Cheng, Wai Teng, Haresh Kumar Kantilal, and Fabian Davamani. “The Mechanism of  
814 Bacteroides Fragilis Toxin Contributes to Colon Cancer Formation.” *The Malaysian Journal*  
815 *of Medical Sciences: MJMS* 27, no. 4 (July 2020): 9–21.  
816 <https://doi.org/10.21315/mjms2020.27.4.2>.
- 817 45. Ridlon, Jason M., and Phillip B. Hylemon. “Identification and Characterization of Two Bile  
818 Acid Coenzyme A Transferases from Clostridium Scindens, a Bile Acid 7 $\alpha$ -Dehydroxylating  
819 Intestinal Bacterium.” *Journal of Lipid Research* 53, no. 1 (January 2012): 66–76.  
820 <https://doi.org/10.1194/jlr.M020313>.
- 821 46. Marion, Solenne, Nicolas Studer, Lyne Desharnais, Laure Menin, Stéphane Escrig, Anders  
822 Meibom, Siegfried Hapfelmeier, and Rizlan Bernier-Latmani. “In Vitro and in Vivo  
823 Characterization of Clostridium Scindens Bile Acid Transformations.” *Gut Microbes* 10, no.  
824 4 (July 4, 2019): 481–503. <https://doi.org/10.1080/19490976.2018.1549420>.
- 825 47. Ajouz, Hana, Deborah Mukherji, and Ali Shamseddine. “Secondary Bile Acids: An  
826 Underrecognized Cause of Colon Cancer.” *World Journal of Surgical Oncology* 12, no. 1  
827 (2014): 164. <https://doi.org/10.1186/1477-7819-12-164>.
- 828 48. Ocvirk, Soeren, and Stephen J.D. O’Keefe. “Dietary Fat, Bile Acid Metabolism and  
829 Colorectal Cancer.” *Seminars in Cancer Biology*, October 2020, S1044579X2030208X.  
830 <https://doi.org/10.1016/j.semcancer.2020.10.003>.

- 831 49. Goncalves, Marcus D., Changyuan Lu, Jordan Tutnauer, Travis E. Hartman, Seo-Kyoung  
832 Hwang, Charles J Murphy, Chantal Pauli, et al. “High-Fructose Corn Syrup Enhances  
833 Intestinal Tumor Growth in Mice.” *Science* 363, no. 6433 (March 22, 2019): 1345–49.  
834 <https://doi.org/10.1126/science.aat8515>.
- 835 50. Michaud, Dominique S., Charles S. Fuchs, Simin Liu, Walter C. Willett, Graham A. Colditz,  
836 and Edward Giovannucci. “Dietary Glycemic Load, Carbohydrate, Sugar, and Colorectal  
837 Cancer Risk in Men and Women.” *Cancer Epidemiology, Biomarkers & Prevention: A  
838 Publication of the American Association for Cancer Research, Cosponsored by the American  
839 Society of Preventive Oncology* 14, no. 1 (January 2005): 138–47.
- 840 51. Lundt, Inge, and Shukun Yu. “1,5-Anhydro-d-Fructose: Biocatalytic and Chemical Synthetic  
841 Methods for the Preparation, Transformation and Derivatization.” *Carbohydrate Research*  
842 345, no. 2 (January 2010): 181–90. <https://doi.org/10.1016/j.carres.2009.11.004>.
- 843 52. Ito, Takashi, Takaaki Totoki, Seiya Takada, Shotaro Otsuka, and Ikuro Maruyama. “Potential  
844 Roles of 1,5-Anhydro-d-Fructose in Modulating Gut Microbiome in Mice.” *Scientific  
845 Reports* 11, no. 1 (December 2021): 19648. <https://doi.org/10.1038/s41598-021-99052-y>.
- 846 53. Meng, Xiaojie, Ko-ichi Kawahara, Yuko Nawa, Naoki Miura, Binita Shrestha, Salunya  
847 Tancharoen, Hisayo Sameshima, Teruto Hashiguchi, and Ikuro Maruyama. “1,5-Anhydro-d-  
848 Fructose Attenuates Lipopolysaccharide-Induced Cytokine Release via Suppression of NF-  
849 KB P65 Phosphorylation.” *Biochemical and Biophysical Research Communications* 380, no.  
850 2 (March 2009): 343–48. <https://doi.org/10.1016/j.bbrc.2009.01.084>.
- 851 54. Jin, Ye, Yang Liu, Lei Zhao, Fuya Zhao, Jing Feng, Shengda Li, Huinan Chen, et al. “Gut  
852 Microbiota in Patients after Surgical Treatment for Colorectal Cancer.” *Environmental  
853 Microbiology* 21, no. 2 (February 2019): 772–83. <https://doi.org/10.1111/1462-2920.14498>.

- 854 55. Gholizadeh, Pourya, Hosein Eslami, and Hossein Samadi Kafil. “Carcinogenesis  
855 Mechanisms of *Fusobacterium Nucleatum*.” *Biomedicine & Pharmacotherapy* 89 (May  
856 2017): 918–25. <https://doi.org/10.1016/j.biopha.2017.02.102>.
- 857 56. Bess, Elizabeth N., Jordan E. Bisanz, Fauna Yarza, Annamarie Bustion, Barry E. Rich,  
858 Xingnan Li, Seiya Kitamura, et al. “Genetic Basis for the Cooperative Bioactivation of Plant  
859 Lignans by *Eggerthella Lenta* and Other Human Gut Bacteria.” *Nature Microbiology* 5, no. 1  
860 (January 2020): 56–66. <https://doi.org/10.1038/s41564-019-0596-1>.
- 861 57. Webb, Amy L., and Marjorie L. McCullough. “Dietary Lignans: Potential Role in Cancer  
862 Prevention.” *Nutrition and Cancer* 51, no. 2 (March 2005): 117–31.  
863 [https://doi.org/10.1207/s15327914nc5102\\_1](https://doi.org/10.1207/s15327914nc5102_1).
- 864 58. Adlercreutz, Herman. “Lignans and Human Health.” *Critical Reviews in Clinical Laboratory*  
865 *Sciences* 44, no. 5–6 (January 2007): 483–525. <https://doi.org/10.1080/10408360701612942>.
- 866 59. Aune, D., D. S. M. Chan, R. Lau, R. Vieira, D. C. Greenwood, E. Kampman, and T. Norat.  
867 “Dietary Fibre, Whole Grains, and Risk of Colorectal Cancer: Systematic Review and Dose-  
868 Response Meta-Analysis of Prospective Studies.” *BMJ* 343, no. nov10 1 (November 11,  
869 2011): d6617–d6617. <https://doi.org/10.1136/bmj.d6617>.
- 870 60. Donohoe, Dallas R., Nikhil Garge, Xinxin Zhang, Wei Sun, Thomas M. O’Connell, Maureen  
871 K. Bunger, and Scott J. Bultman. “The Microbiome and Butyrate Regulate Energy  
872 Metabolism and Autophagy in the Mammalian Colon.” *Cell Metabolism* 13, no. 5 (May 4,  
873 2011): 517–26. <https://doi.org/10.1016/j.cmet.2011.02.018>.
- 874 61. Hague, Angela, Douglas J. E. Elder, Diane J. Hicks, and Christos Paraskeva. “Apoptosis in  
875 Colorectal Tumour Cells: Induction by the Short Chain Fatty Acids Butyrate, Propionate and

- 876 Acetate and by the Bile Salt Deoxycholate.” *International Journal of Cancer* 60, no. 3  
877 (January 27, 1995): 400–406. <https://doi.org/10.1002/ijc.2910600322>.
- 878 62. Hamer, H. M., D. Jonkers, K. Venema, S. Vanhoutvin, F. J. Troost, and R.-J. Brummer.  
879 “Review Article: The Role of Butyrate on Colonic Function.” *Alimentary Pharmacology &*  
880 *Therapeutics* 27, no. 2 (October 26, 2007): 104–19. [https://doi.org/10.1111/j.1365-](https://doi.org/10.1111/j.1365-2036.2007.03562.x)  
881 [2036.2007.03562.x](https://doi.org/10.1111/j.1365-2036.2007.03562.x).
- 882 63. Davie, James R. “Inhibition of Histone Deacetylase Activity by Butyrate.” *The Journal of*  
883 *Nutrition* 133, no. 7 (July 1, 2003): 2485S–2493S. <https://doi.org/10.1093/jn/133.7.2485S>.
- 884 64. Goldstein, Neal S. “Serrated Pathway and APC (Conventional)-Type Colorectal Polyps:  
885 Molecular-Morphologic Correlations, Genetic Pathways, and Implications for  
886 Classification.” *American Journal of Clinical Pathology* 125, no. 1 (January 2006): 146–53.  
887 <https://doi.org/10.1309/87BD0C6UCGUG236J>.

**Main figures:**

**Figure 1: Study design**

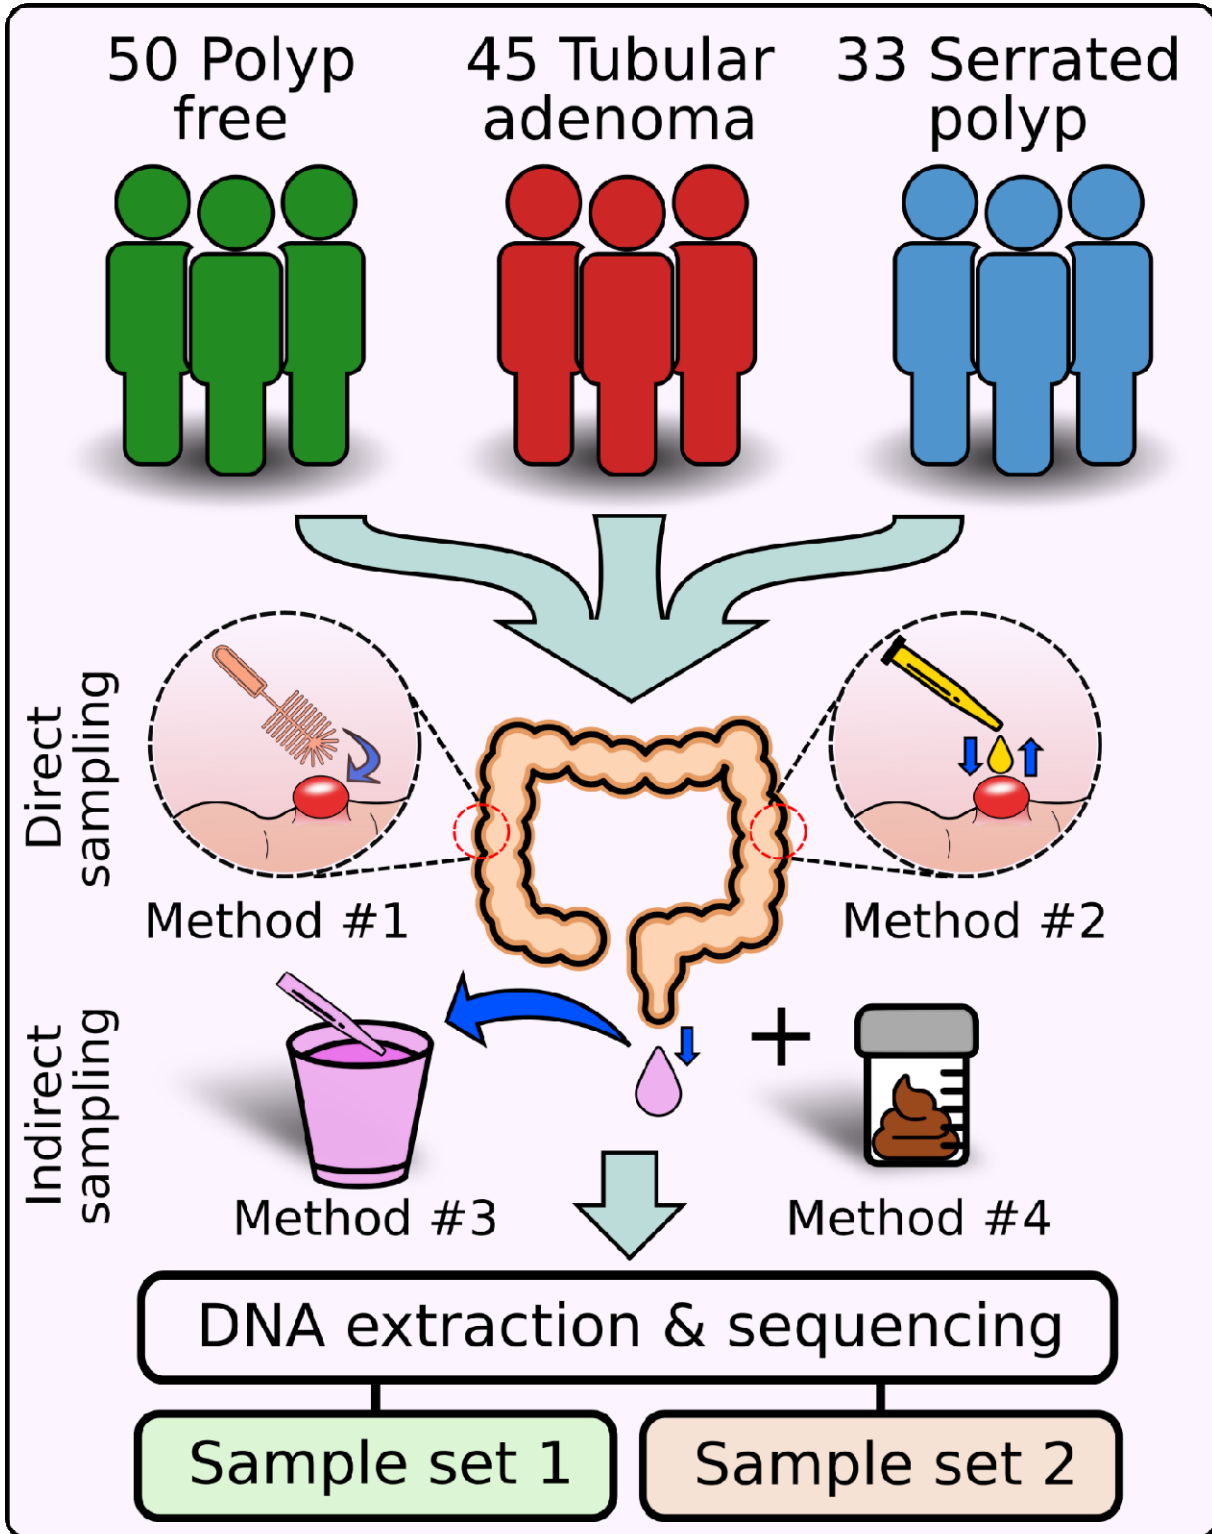

***Figure 2: Microbiomes of Mucosal and Lavage Samples are similar to each other but different from those in Feces.***

**A. 16S - Individuals: 38**

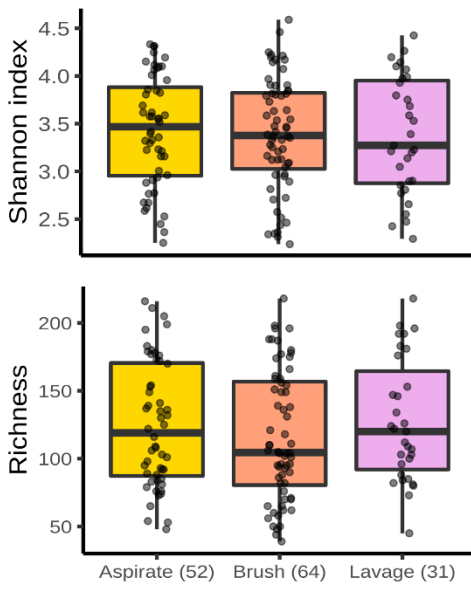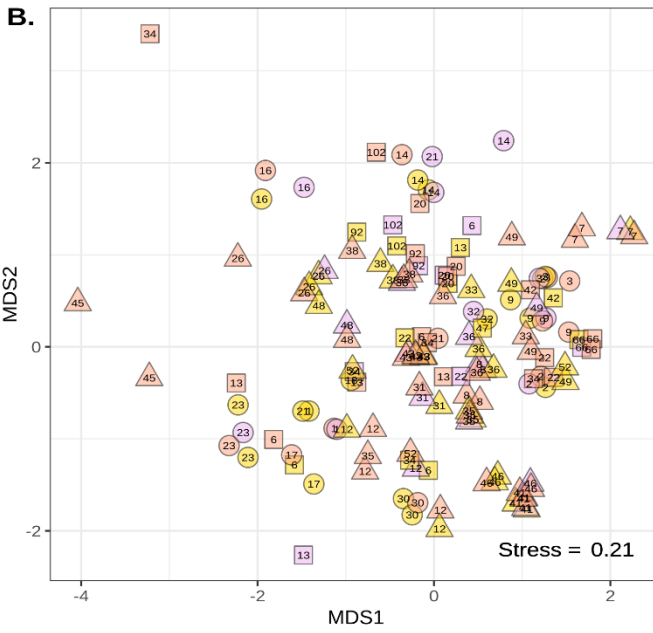

**C. ITS - Individuals: 35**

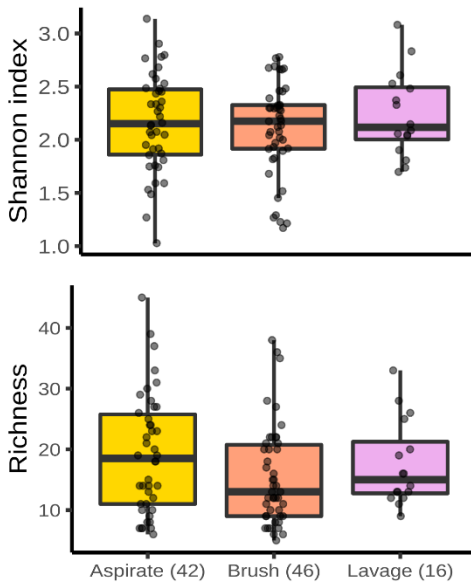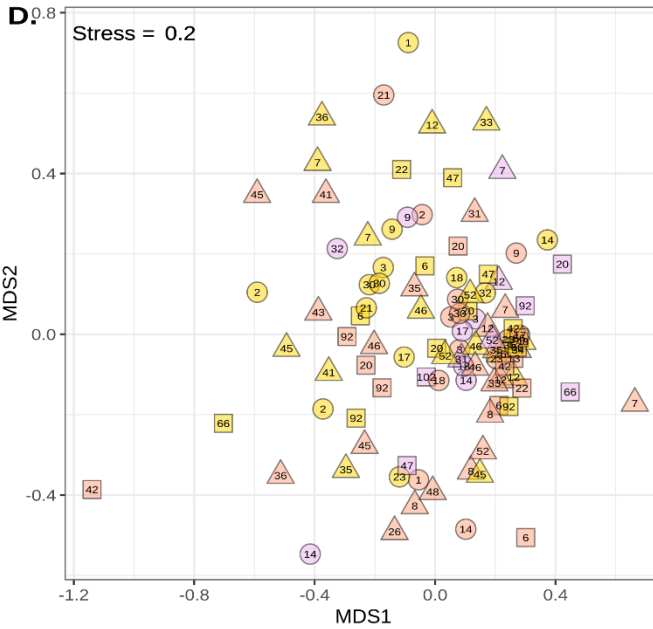

**E. Shotgun - Individuals: 105**

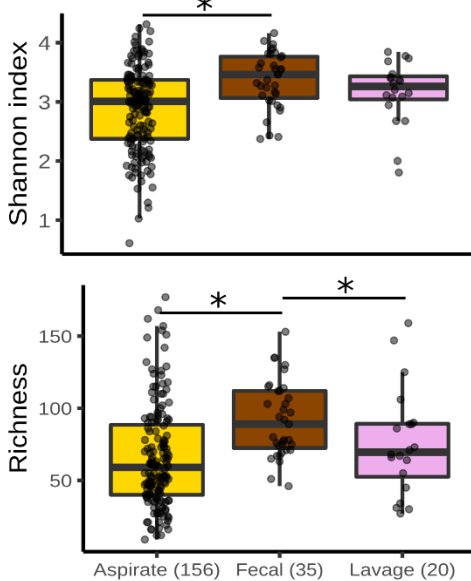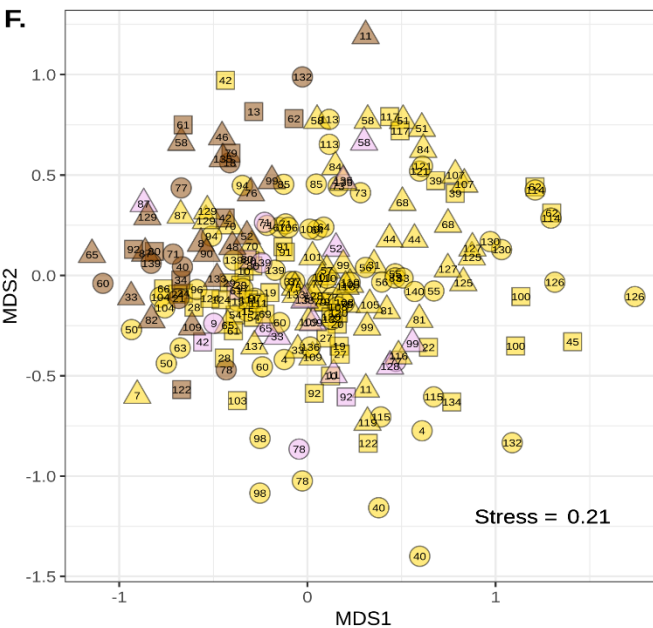



**Figure 3: The Microbiomes of Polyps and Opposite Wall Healthy Tissue are similar within Individuals.**

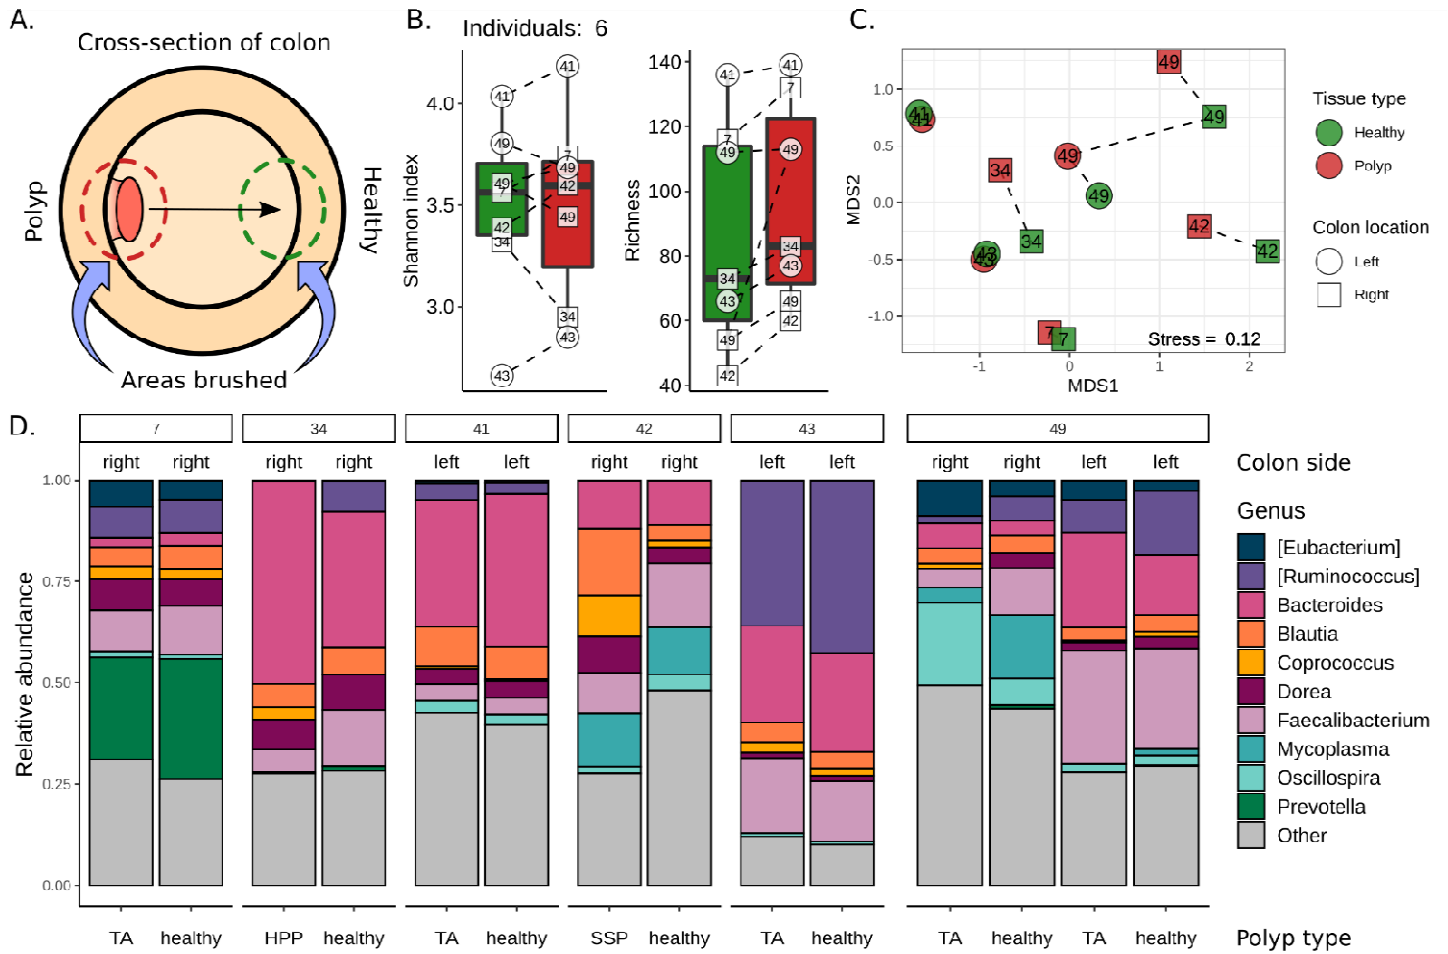

**Figure 4: Tubular Adenoma-bearing, Serrated Polyp-bearing, and Healthy Individuals have distinct Microbiomes.**

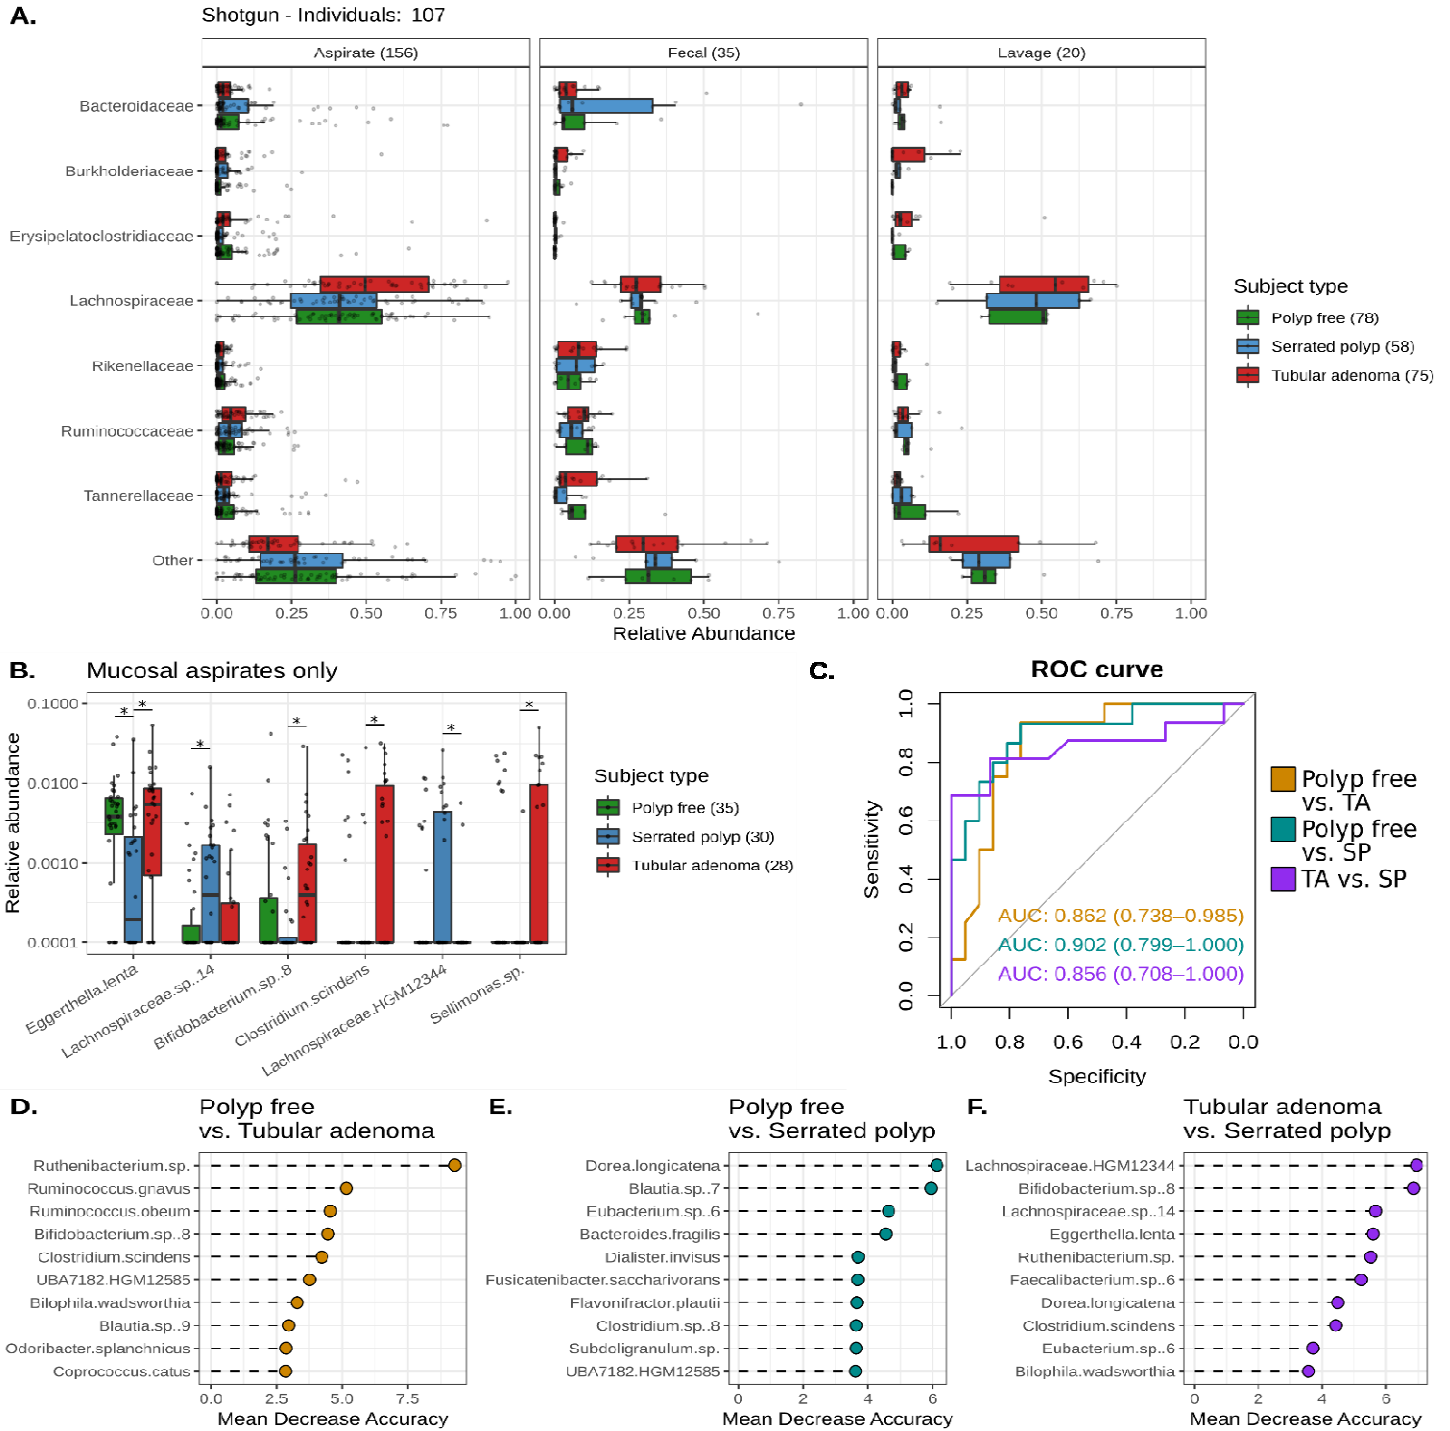

**Figure 5: Microbiome Functional Potential is distinct across Subject Types.**

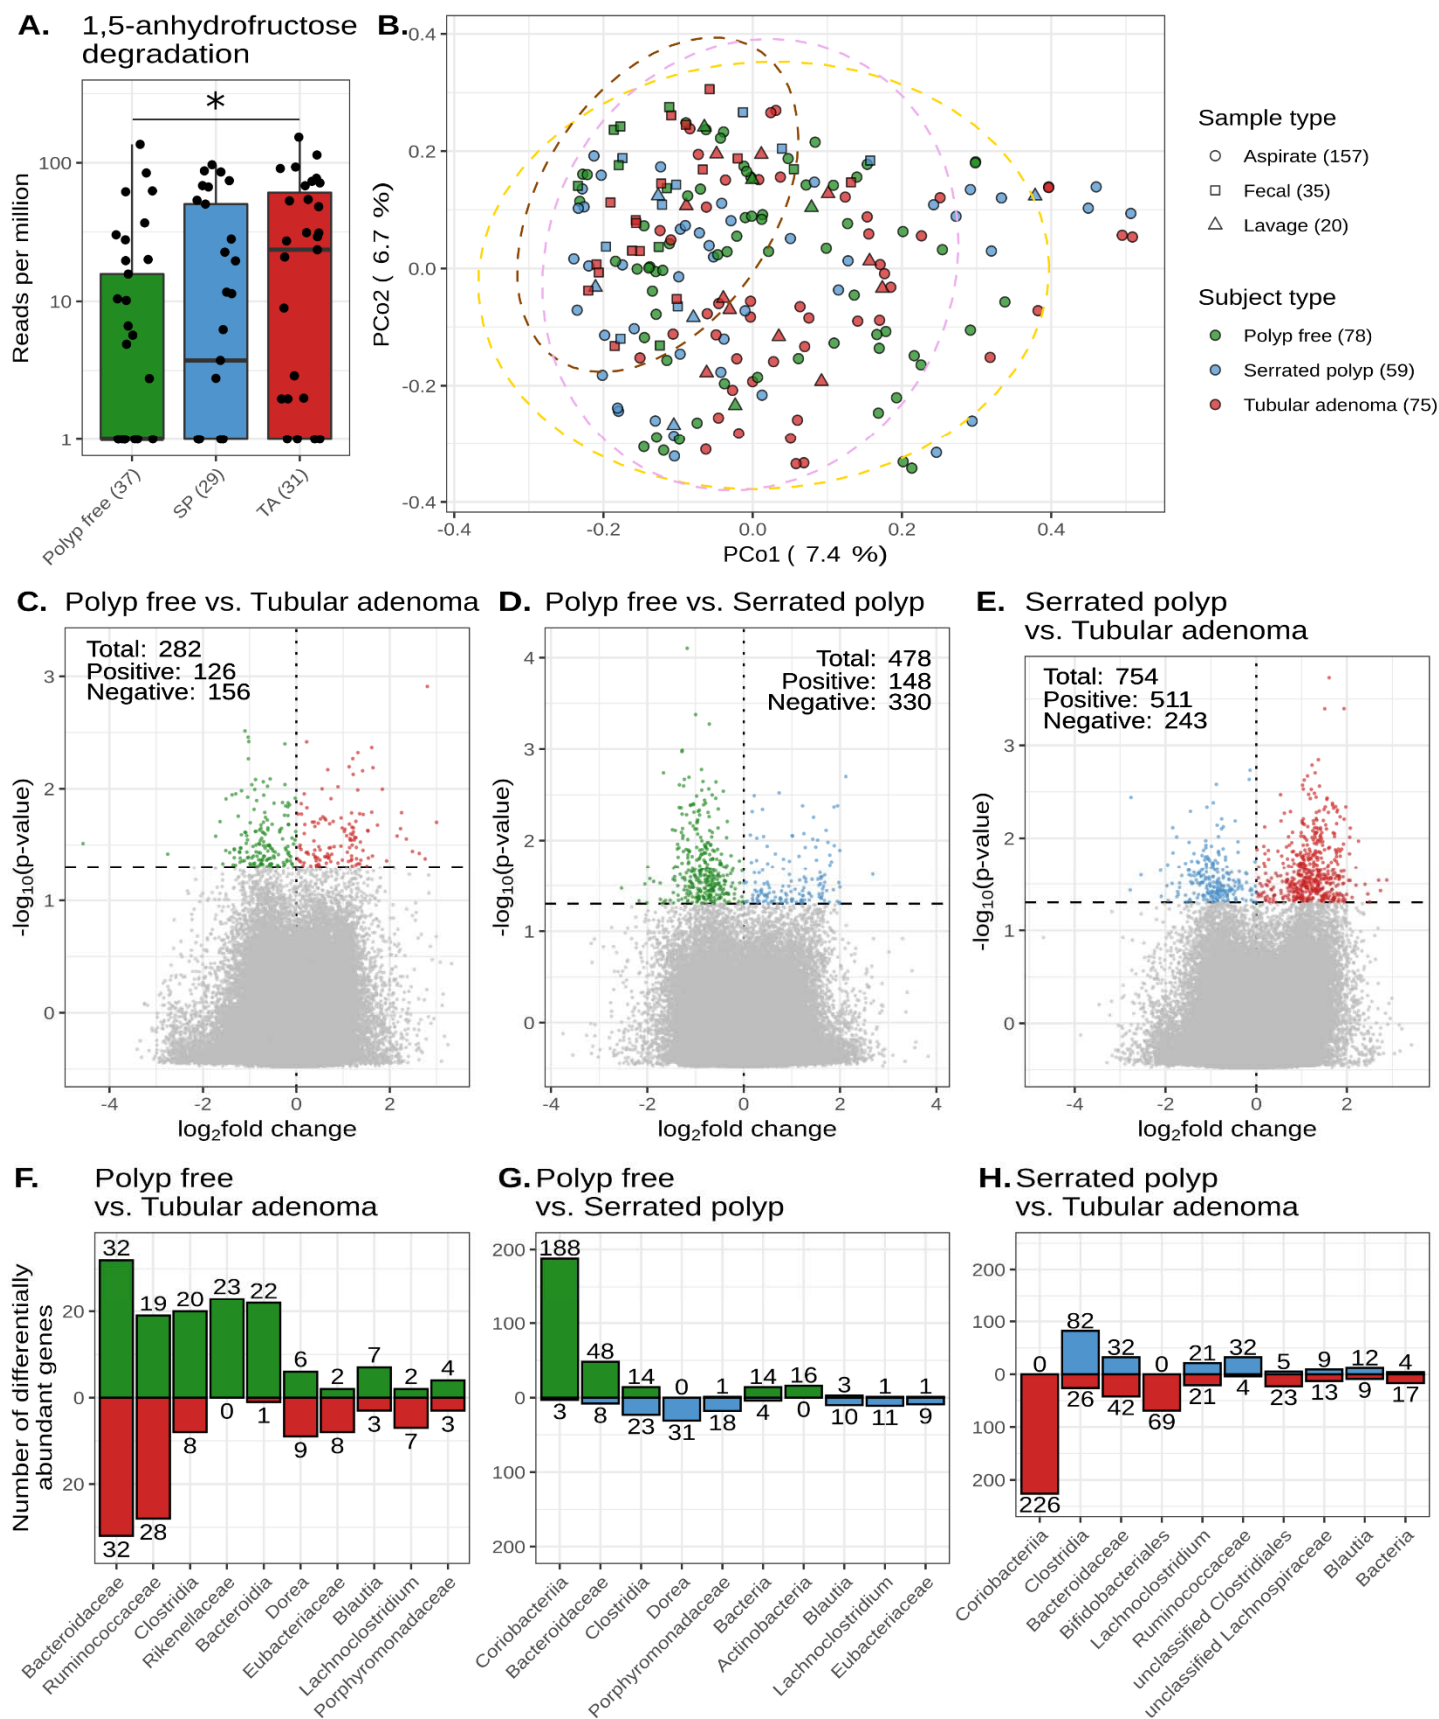

Source: https://www.biorxiv.org/content/10.1101/2021.07.20.453135v2.full.pdf
